1 **Title**

2 Local adaptation insights from genomics and ecophysiology of a neotropical mangrove

3 **Short title**

4 Local adaptation of a neotropical mangrove

5 **Authors**

6 Mariana Vargas Cruz<sup>1</sup>, Gustavo Maruyama Mori<sup>2</sup>, Caroline Signori Müller<sup>1</sup>, Carla Cristina da  
7 Silva<sup>1</sup>, Dong-Ha Oh<sup>3</sup>, Maheshi Dassanayake<sup>3</sup>, Maria Imaculada Zucchi<sup>4</sup>, Rafael Silva  
8 Oliveira<sup>1</sup> and Anete Pereira de Souza<sup>1</sup>†

9

10 <sup>1</sup> Department of Plant Biology, Institute of Biology, University of Campinas, Campinas, São  
11 Paulo, Brazil

12 <sup>2</sup>Institute of Biosciences, São Paulo State University (Unesp), São Vicente, São Paulo, Brazil

13 <sup>3</sup>Department of Biological Sciences, Louisiana State University, Louisiana, United States

14 <sup>4</sup>São Paulo Agency for Agribusiness Technology, Piracicaba, São Paulo, Brazil

15 †Corresponding author Email: [anete@unicamp.br](mailto:anete@unicamp.br)

16 **Abstract**

17 Integrating genomic and ecological data is instrumental for understanding the mechanisms of  
18 adaptive processes in natural ecosystems. In non-model species, such studies can be  
19 particularly challenging but often yield results with implications for conservation. Here, we  
20 integrate molecular and ecophysiological approaches to assess the role of selection in the  
21 north-south organisation of genetic variation in the mangrove species *Avicennia schaueriana*,  
22 a new-world tree found in tropical to temperate coastal forests along the Atlantic coast of the  
23 Americas. We found substantial divergences between populations occurring north and south  
24 of the north-eastern extremity of South America, possibly reflecting the roles of contrasting  
25 environmental forces in shaping the genetic structure of the species. In a common garden  
26 experiment, individuals from equatorial and subtropical forests were found to be divergent in  
27 traits involved in water balance and carbon acquisition, suggesting a genetic basis of the  
28 observed differences. RNA-sequencing highlighted the molecular effects of different light,  
29 temperature and air humidity regimes on individuals under field conditions at contrasting  
30 latitudes. Additionally, genome-wide polymorphisms in trees sampled along most of the  
31 species' range showed signatures of selection in sequences associated with the biogenesis of  
32 the photosynthetic apparatus, anthocyanin biosynthesis and osmotic and hypoxia stress  
33 responses. The observed functional divergence might differentially affect sensitivities of  
34 populations to our changing climate. We emphasize the necessity of independent conservation  
35 management for the long-term persistence of the species' diversity. Moreover, we  
36 demonstrate the power of using a multidisciplinary approach in adaptation studies of non-  
37 model species.

38 **Keywords**

39 Adaptation genomics, comparative transcriptomics, plant ecophysiology, Avicenniaceae

## 40 **Introduction**

41           Adaptation to contrasting environments is an ubiquitous consequence of divergent  
42 selective forces acting on intraspecific phenotypic diversity (Hereford, 2009; Kawecki &  
43 Ebert, 2004). Phenotypic variation can be achieved through plasticity during acclimation to  
44 environmental changes or through genetic variation shaped by adaptive processes (Albert,  
45 Grassein, Schurr, Vieilledent, & Violle, 2011). Though the occurrence of intraspecific  
46 divergence in adaptive traits is well recognised, its molecular basis is not yet fully understood  
47 (Savolainen, Lascoux, & Merilä, 2013). The integration of multiple independent approaches  
48 to understand the bases of adaptive variation is desirable to minimise the potential for  
49 incorrect conclusions (Barrett & Hoekstra, 2011).

50           In addition to being of fundamental relevance in the field of evolutionary biology,  
51 research on the molecular mechanisms underlying adaptive variation may provide valuable  
52 information for safeguarding the persistence of populations under environmental challenges.  
53 Especially, accelerated rates of contemporary climate change call for studies on functional  
54 variation and its consequences for species responses to future climate (Moran, Hartig, & Bell,  
55 2016). Climate change forecasts include a rise in atmospheric CO<sub>2</sub> concentrations up to 550-  
56 1000 ppm, leading to a 0.3-4.8 °C increase in mean air temperature, a 0.26-0.82 m sea-level  
57 rise and great changes in precipitation regimes by 2100 (Pachauri & Meyer, 2014). These  
58 changes are projected to especially affect certain ecosystems, such as mangrove forests  
59 (Loarie et al., 2009), since they are distributed in narrow intertidal environments in tropical  
60 and subtropical zones and are naturally limited by annual minimum temperatures and average  
61 rainfall (Osland et al., 2017). Recent changes have already promoted shifts in the distribution  
62 of mangroves and in the density of individuals in populations (Cavanaugh et al., 2014; Duke  
63 et al., 2017; Lovelock et al., 2015; Shearman, Bryan, & Walsh, 2013). Negative impacts are

64 predicted mainly in regions in which aridity is expected to increase and where adjacent areas  
65 for expansion are unavailable or do not exist (Alongi, 2015). However, in some regions,  
66 mangroves might persist through their ability to adjust soil elevation (Lovelock et al., 2015;  
67 McKee, Cahoon, & Feller, 2007) and to rapidly shift their distributions to new suitable areas  
68 (Alongi, 2015; López-Medellín et al., 2011; Lovelock et al., 2015).

69 Yet, these predictions do not account for extant intraspecific variability across the  
70 geographical distribution of a given species. For instance, the genetic diversity of all  
71 mangrove species studied to date is structured into two populations occurring north and south  
72 of the northeast extremity of South America (NEESA) (Francisco, Mori, Alves, Tambarussi,  
73 & Souza, 2018; Mori, Zucchi, & Souza, 2015). In the NEESA region, the "South Equatorial  
74 Current" bifurcates into "Guiana Current" and "Brazil Current", dispersing mangrove  
75 propagules in opposite directions, likely reducing the gene flow between populations  
76 (Francisco et al., 2018; Mori et al., 2015; Takayama, Tateishi, Murata, & Kajita, 2008) (Fig.  
77 1). As limited gene flow is a key process determining the magnitude of local adaptation, one  
78 could expect these populations to adapt differently to their environments (Kawecki & Ebert,  
79 2004; Savolainen, Pyhäjärvi, & Knürr, 2007). However, the neutral nature of the molecular  
80 markers used in previous works precludes inferences regarding environment-driven genetic  
81 divergence.

82 Advances in DNA sequencing now permit the identification of neutral and putatively  
83 adaptive genetic variation even in non-model organisms, such as mangrove trees (Andrews,  
84 Good, Miller, Luikart, & Hohenlohe, 2016). Here, we used these tools to investigate the non-  
85 neutral divergence between previously identified populations of the new-world mangrove tree  
86 *Avicennia schaueriana* Stapf & Leechman ex Moldenke. We further explored the potential  
87 role of environmental forces underlying such divergence along the Atlantic coast of South

88 America. *Avicennia schaueriana* is the most widely distributed mangrove species for which  
89 genetic diversity information is available over its geographic range. The species is found in  
90 the Lesser Antilles (~16 °N) and from Venezuela to the southernmost mangrove forests in the  
91 Atlantic (~28 °S) (Soares, Estrada, Fernandez, & Tognella, 2012). To avoid generating  
92 incorrect conclusions about the targets of selection (Barrett & Hoekstra, 2011), we integrated  
93 three independent but complementary molecular and ecological approaches: (1) comparative  
94 physiology of equatorial and subtropical samples grown in a common garden experiment; (2)  
95 comparative transcriptomics of trees from equatorial and subtropical localities, sampled in  
96 their native environments (Table 1, Supplemental Fig. 1); and (3) genome scans for signatures  
97 of selection using high-throughput genome-wide genotyping of individuals, sampled along  
98 almost the entire distribution of the species (Fig. 1). We discuss the implications of our results  
99 in the context of rapidly changing climate and suggest strategies for mangrove conservation  
100 along the Atlantic coast of South America.

## 101 **Materials and Methods**

### 102 ***Propagule sampling***

103 Mature propagules were collected from ten *A. schaueriana* mother trees, at least 100  
104 m apart from each other, from each of two natural populations described in a previous work  
105 (Mori et al., 2015): (1) the southernmost range limit of American mangroves, in the  
106 subtropical region, and (2) one equatorial site in one of the world's largest macrotidal  
107 mangrove forests (Kjerfve et al., 2002; Souza-Filho et al., 2006), near the northernmost limit  
108 of the species range (Fig. 1). We refer to samples collected in the former site as 'Subtropical'  
109 and in the latter as 'Equatorial' throughout this work. A detailed characterisation of each site

110 can be found in Table 1 and in the Supplemental Information file (Supplemental methods S1,  
111 Supplemental Fig. 1).

112

### 113 ***Comparative ecophysiology in a common garden experiment***

114 Propagules of *A. schaueriana* sampled from the Equatorial and Subtropical sites were  
115 germinated as described for *Avicennia germinans* (Reef et al., 2014). After two months, 44  
116 similar-sized seedlings from each sampling site—with an average height of 18 cm, most with  
117 three leaf pairs and senesced cotyledons—were transplanted to 6 L pots filled with topsoil and  
118 sand (1:1). Seedlings were cultivated for seven months under homogenous conditions in a  
119 glasshouse at the University of Campinas, São Paulo, Brazil (22°49' S 47°04' W), where  
120 automatic sensors coupled with a data logger (Onset Computer Corp.) measured the  
121 atmospheric humidity and temperature every 15 minutes. Seedlings were automatically  
122 irrigated (daily at 10 a.m. and 5 p.m.) with a 3-minute fresh water spray. Twice a week,  
123 nutrients were added to the soil using 600 mL of 0.4X Hoagland solution with 15.0 g L<sup>-1</sup>  
124 NaCl per pot. Pots were rotated weekly to reduce the effects of environmental heterogeneity.  
125 Because the environmental conditions in the glasshouse differed markedly from those at each  
126 sampling site (Supplemental Fig. 2), none of the individuals benefitted from conditions that  
127 corresponded to those of their origins.

128 The light reflectance of stems was measured in ten plants from each sampling site  
129 using a USB4000 spectrophotometer (OceanOptics, Inc.) coupled to a deuterium-halogen  
130 light source (DH-2000; OceanOptics), using a light emission range from 200-900 nm.  
131 Photosynthesis, stomatal conductance and transpiration rates were measured every 2.0-2.5  
132 hours in five six-month-old individuals from each sampling site on two different days using a  
133 Li-Cor 6400 XT (Li-Cor Corp.).

134           After harvest, three plants without flowers or flower buds from each sampling site  
135 were split into leaves, stems and roots, washed with distilled water, dried for 7 days at 70 °C  
136 and weighed. The individual leaf area, total leaf area and leaf lamina angle per plant were  
137 measured through photographic analyses using ImageJ (Schneider, Rasband, & Eliceiri,  
138 2012). The specific leaf area (SLA, cm<sup>2</sup> leaf area kg<sup>-1</sup> leaf dry biomass) was also calculated  
139 for these samples. Stems were fixed in FAA (Formaldehyde Alcohol Acetic acid), stored in  
140 70% alcohol for wood anatomy analysis and cut into 30 µm thick transverse sections.  
141 Sections were stained with a mixture of 1% Astra Blue and 50% alcohol (1:1) followed by  
142 1% Safranin O. Micrographs were taken from slides using an Olympus BX51 microscope  
143 coupled to an Olympus DP71 camera (Olympus Corp.). The following wood traits were  
144 quantified using ImageJ and R v.4.0.0: vessel lumen area (A), vessel density in xylem  
145 (number of vessels/xylem area), proportion of solitary vessels (number of solitary  
146 vessels/total number of vessels), vessel grouping index (mean number of vessels per vessel  
147 grouping), vessel lumen area ratio in xylem (vessel lumen area/xylem area) and vessel lumen  
148 area in sapwood (vessel lumen area/sapwood area). The vessel arithmetic diameter (D), vessel  
149 hydraulic conductivity (K<sub>H</sub>) and lumen resistivity (R<sub>L</sub>) were estimated according to Scholz et  
150 al. (Scholz, Klepsch, Karimi, & Jansen, 2013).

151           Statistical comparisons between Equatorial and Subtropical samples were performed  
152 in R 4.0.0 using the Mann-Whitney-Wilcoxon unpaired test for non-parametric distributions  
153 and unpaired Student's t-test for parametric distributions with 5% significance level.  
154 Multiple-group comparisons were conducted using one-way analysis of variance (ANOVA)  
155 with post hoc Tukey honest significant difference (HSD) tests.

156

157 ***Plant material for RNA extraction and RNA-sequencing***



158 Plant material used for RNA-sequencing (RNA-Seq) was collected in the sites  
159 described in the “Propagule sampling” section. Leaves, stems and flowers from three adult  
160 trees at least 100 m apart were collected in each site from July-August of 2014, corresponding  
161 to the end of winter at the Subtropical site and the beginning of the dry season at the  
162 Equatorial site. A detailed description of environmental conditions at the time of sampling is  
163 available in Supplemental Table 1. Sampling occurred from 11:00 am to 4:00 pm during the  
164 low tide at different altitudes in the intertidal zone. Plant material was washed with sodium  
165 hypochlorite solution (0.2%) and immediately stored in RNAlater (Ambion Inc.).

166 We extracted RNA according to Oliveira et al. (Oliveira, Viana, Reátegui, &  
167 Vincentz, 2015) and evaluated its integrity and purity using agarose gel electrophoresis and a  
168 NanoVue spectrophotometer (GE Healthcare Life Sciences). Illumina TruSeq RNA Sample  
169 Preparation kits (Illumina Inc.) were used to construct libraries. cDNA quality was assessed  
170 using the Agilent 2100 Bioanalyzer (Agilent Technologies) and concentrations were  
171 quantified by qPCR using the Sequencing Library qPCR Quantification kit (Illumina Inc.)  
172 followed by sequencing using two 36-cycle TruSeq SBS Paired End kits (Illumina Inc.) and a  
173 Genome Analyzer IIx sequencer (Illumina Inc.).

174

#### 175 ***Assembly and characterisation of the transcriptome of A. schaueriana***

176 Adapter sequences were trimmed, and 72 bp paired-end reads were filtered by quality  
177 (Phred score  $\geq 20$  for at least 70% of read length) using the NGS QC Toolkit v.2.3 (Patel &  
178 Jain, 2012). High-quality reads were used for subsequent transcriptome assembly in the CLC  
179 Genomics Workbench (<https://www.qiagenbioinformatics.com/>). We used the default  
180 settings, except for the distance between read pairs (300-500 bp) and k-mer size (45 bp).

181 Reads were mapped to the assembled transcripts using bowtie1 (Langmead, Trapnell,  
182 Pop, & Salzberg, 2009) in the single-read mode using the default parameters. Transcripts  
183 without read-mapping support were removed. Functional annotation was performed using  
184 blastx v.2.2.31 (Camacho et al., 2009) with an e-value  $< 1^{-10}$ . The NCBI RefSeq (O’Leary et  
185 al., 2016), The Arabidopsis Information Resource (TAIR) (Berardini et al., 2015) and the  
186 NCBI non-redundant (nr) databases were used as references. To minimize contaminants, we  
187 excluded all transcripts that were exclusively similar to non-plant sequences. Protein family  
188 domains were identified using HMMER3 (Finn et al., 2014), which iteratively searched all  
189 assembled sequences against the Pfam database. To assign Gene Ontology (GO) terms to  
190 transcripts, we used the *Arabidopsis thaliana* gene association file from the Gene Ontology  
191 Consortium (Blake et al., 2015) and retrieved the information for transcripts with similar  
192 coding sequences in the genome of *A. thaliana*. Redundant transcripts were clustered using  
193 CD-HIT-EST v.4.6.1 (Li & Godzik, 2006) using the local alignment mode with 95% identity  
194 and 70% coverage of the shortest sequence thresholds. Open reading frames (ORF) in  
195 putative protein-coding transcripts were identified using Transdecoder  
196 (<http://transdecoder.sf.net>). We reduced the redundancy of transcripts in the final assembly by  
197 retaining for each CD-HIT-EST cluster either the sequence with the longest ORF or, in the  
198 absence of sequences containing ORF, the longest sequence.

199 The completeness of the final transcriptome was assessed using BUSCO (Simão,  
200 Waterhouse, Ioannidis, Kriventseva, & Zdobnov, 2015). Additionally, a reciprocal blastn  
201 alignment (Camacho et al., 2009) using an e-value threshold of  $10^{-10}$  and a minimum  
202 alignment length of 100 nucleotides with at least 70% identity was used to compare the *A.*  
203 *schaueriana* transcriptome with other publicly available transcriptomes of congeneric species.  
204

205 ***Comparative transcriptomics using RNA-sequencing***

206 Tissue-specific count data were obtained from the number of reads uniquely mapped  
207 to each transcript of the non-redundant transcriptome using bowtie1 (Langmead et al., 2009)  
208 and normalised using edgeR (Robinson, McCarthy, & Smyth, 2010). Differentially expressed  
209 transcripts (DETs) between tissue-specific samples of trees at the Equatorial and Subtropical  
210 sites were detected using the exact test for negative binomial distributions with an adjusted P-  
211 value < 0.05. GO term enrichment analyses of the DETs were performed using GSeq  
212 (Young, Wakefield, Smyth, & Oshlack, 2010) with the Wallenius approximation method and  
213 P-value < 0.05. Differential expression results were verified using reverse transcription real-  
214 time PCR (qRT-PCR) (Supplemental methods S2).

215

216 ***Detection of candidate adaptive loci in A. schaueriana***

217 We sampled leaves from 79 adult plants at ten locations, spanning most of the  
218 geographic range of *A. schaueriana* (Fig. 1, Supplemental Table 2). We isolated DNA using  
219 the DNeasy Plant Mini Kit (QIAGEN) and NucleoSpin Plant II (Macherey Nagel) following  
220 the manufacturers' instructions. DNA quality and quantity were assessed using 1% agarose  
221 electrophoresis and the QuantiFluor dsDNA System with the Quantus fluorometer (Promega).  
222 Nextera-tagmented reductively-amplified DNA (nextRAD) libraries (Russello, Waterhouse,  
223 Etter, & Johnson, 2015) were prepared and sequenced by SNPsaurus (SNPsaurus) in a HiSeq  
224 2500 (Illumina, Inc.) with 100 bp single-end chemistry. Briefly, genomic DNA fragmentation  
225 and short adapter ligation were performed with Nextera reagent (Illumina) followed by  
226 amplification with one of the primers matching the adapter and extending nine arbitrary  
227 nucleotides into the genomic DNA. Thus, the resulting amplicons were fixed at the selective  
228 end, and their lengths were dependent on the initial Nextera fragmentation, leading to

229 consistent genotyping of the amplified loci. Assembly, mapping and single nucleotide  
230 polymorphic loci (SNP) identification were performed using proprietary custom scripts  
231 (SNPsaurus), which created a reference catalogue of abundant reads across the combined  
232 sample set and mapped reads to this reference, allowing two mismatches and retaining  
233 biallelic loci present in at least 10% of the samples. We further filtered markers by allowing  
234 no more than 65% of missing data, Phred score > 30, 8x minimum coverage, only one SNP  
235 per locus and a minor allele frequency  $\geq 0.05$  using vcftools v.0.1.12b (Danecek et al., 2011).  
236 To reduce paralogy or low-quality genotype calls, we used a maximum read coverage of 56  
237 (the average read depth times 1.5 standard deviation).

238 After excluding plants morphologically identified as *A. schaueriana* with genomic  
239 signs of hybridisation with *A. germinans* (data not published), we assessed the genetic  
240 structure in *A. schaueriana*, considering all SNPs, using discriminant analysis of principal  
241 components (DAPC) (Jombart, Devillard, & Balloux, 2010) and ADMIXTURE v.1.3.0  
242 (Alexander, Novembre, & Lange, 2009). For DAPC analyses, we considered the number of  
243 groups varying from 1 to 50 and the Bayesian information criteria for inferring the number of  
244 groups (K). Additionally, we used the optim.a.score function to avoid over-fitting during the  
245 discrimination steps. For the ADMIXTURE analyses, we performed three separate runs for K  
246 varying between 1 and 15, using the block-relaxation method for point estimation; computing  
247 was terminated when estimates increased by < 0.0001, and the most likely K-value was  
248 determined by cross-validation.

249 We used methods implemented with two programs to minimise false-positive signs of  
250 natural selection: LOSITAN (Antao, Lopes, Lopes, Beja-Pereira, & Luikart, 2008), assuming  
251 an infinite allele model of mutation, using a confidence interval of 0.99, a false-discovery rate  
252 (FDR) of 0.1, the neutral mean FST and forcing the mean FST options; and pcadapt 3.0.4

253 (Luu, Bazin, & Blum, 2016), which simultaneously identifies the population structure and the  
254 loci excessively related to this structure, using  $FDR < 0.1$ .

255 The sequences presenting SNP with putative evidence of selection were identified  
256 simultaneously by pcadapt and five independent runs of LOSITAN and were searched within  
257 expressed regions of the reference transcriptome. A reciprocal alignment between the short  
258 sequences obtained through nextRAD (75 bp) and the longer expressed sequences assembled  
259 from RNA-Seq data ( $\approx 300$ -11600 bp) was performed. The alignment was conducted using  
260 blastn v.2.2.31 (Camacho et al., 2009), with a threshold of at least 50 aligned nucleotides, a  
261 maximum of one mismatch and no gaps.

## 262 **Results**

### 263 *Comparative physiology in a common garden experiment*

264 To identify functional divergence between individuals from Equatorial and  
265 Subtropical sites, we conducted a common garden experiment in a glasshouse under a  
266 homogeneous, non-climate-controlled environment. We observed differences in key  
267 morphophysiological traits between seedlings from contrasting latitudes (Fig. 2 and 3).  
268 Subtropical plants showed higher transpiration rates and stomatal conductance than did  
269 Equatorial plants (Supplemental Fig. 3). Additionally, the inclination angle of the leaf lamina  
270 was smaller and the average size of individual leaves was smaller in Equatorial than in  
271 Subtropical plants, but the total leaf area and specific leaf area did not significantly differ  
272 between the groups (Fig. 2, Supplemental Table 3, Supplemental Fig. 4). Subtropical plants  
273 accumulated more biomass in all vegetative organs (leaves, stems and roots) than did  
274 Equatorial plants. However, the stem dry mass ratio (stem dry biomass/plant dry biomass)  
275 was greater in Equatorial plants, whereas the leaf dry mass ratio (leaf dry biomass/plant dry

276 biomass) was greater in Subtropical plants. The root dry mass ratio (root dry biomass/plant  
277 dry biomass) was indistinguishable between groups (Supplemental Table 3). Unexpectedly,  
278 63% of the Equatorial plants flowered after six months of growth (Supplemental Fig. 4g).  
279 Since this was not observed in any Subtropical plant, flowering plants were not used in the  
280 biomass allocation analysis.

281 Stems from Subtropical samples showed wider vessel diameter than did those from  
282 Equatorial samples, but vessel density was not significantly different between the groups (Fig.  
283 2, Supplemental Fig. 4h-i). The sapwood space dedicated to vessel lumen area was greater in  
284 Subtropical than in Equatorial plants. Vessels of Subtropical plants showed higher  
285 conductivity, at a detriment of hydraulic safety, than did those of Equatorial plants (Fig. 2).  
286 The total conductivity of the stems was not significantly different between sample groups.  
287 Plants from the contrasting origins exhibited different stem epidermis pigmentation, with  
288 Equatorial seedlings reflecting more red light of long wavelengths (635-700 nm) and less  
289 green light of medium wavelengths (520-560 nm) than did Subtropical seedlings (Fig. 3).

290

### 291 ***Characterisation of the first transcriptome of A. schaueriana***

292 In the absence of a reference genome, we used RNA-Seq (Z. Wang, Gerstein, &  
293 Snyder, 2009) to obtain a *de novo* assembled transcriptome for *A. schaueriana* from leaves,  
294 stems and flowers of six adult individuals from Equatorial and Subtropical sites  
295 (Supplemental Fig. 5). Over 209 million paired-end 72 bp reads showing high quality were  
296 assembled into a reference, non-redundant transcriptome containing 49,490 sequences, of  
297 which 30,227 (61%) were putative protein-coding sequences. Over 91.9% of these reads were  
298 mapped to a single transcript, indicating minimum redundancy and a wide representation of  
299 sequenced data (Supplemental Table 4). Moreover, searching for universal plant orthologous

300 genes revealed that 91.8% of the conserved sequences in plants were present in the reference  
301 transcriptome (Supplemental Table 4). Sequences with complete ORF represented  
302 approximately 42% (12,796) of all putative protein-coding transcripts, with an average length  
303 of 1,324 nucleotides (Supplemental Table 5, Supplemental Fig. 6). Most of these putative  
304 protein-coding sequences (94.33%) showed significant similarity to proteins in the Plant  
305 RefSeq and TAIR databases (Supplemental Fig. 6c). More than 80% of these protein-coding  
306 sequences matched proteins from *Sesamum indicum* or *Erythranthe guttata*, which, as does *A.*  
307 *schaueriana*, belong to the order Lamiales (Supplemental Fig. 6d). We identified 27,658,  
308 18,325 and 13,273 putative orthologs between the *A. schaueriana* reference transcriptome and  
309 transcriptomes derived from *A. marina* leaves (Huang et al., 2014), *A. officinalis* leaves (Lyu,  
310 Li, Guo, He, & Shi, 2017) and roots (Krishnamurthy et al., 2017), respectively (Supplemental  
311 Table 6).

312

### 313 ***Comparative transcriptomics between trees from the Equatorial and Subtropical sites***

314 To identify environmental forces associated with variations in gene expression  
315 between source sites, we sampled leaves, stems and flowers from trees under uncontrolled  
316 field conditions at the end of winter at the Subtropical site and at the beginning of the dry  
317 season at the Equatorial site (Supplemental Table 1). We observed a consistency in transcript  
318 expression levels from leaves and stems among plants from the same sampling site  
319 (Supplemental Fig. 7a and 7b). However, transcript expression levels in flowers were not  
320 concordant among samples from the same origin (Supplemental Fig. 7c), leading to the  
321 identification of only one DET; thus, we did not include flowers in the subsequent analyses  
322 (Supplemental Fig. 7f). Contrastingly, we identified 1,837 and 904 transcripts showing  
323 significantly different (FDR < 0.05) relative abundance in leaves and stems, respectively,

324 between Equatorial and Subtropical samples (Supplemental Fig. 7d and 7e). Among the total  
325 2,741 DETs, 1,150 (41.91%) were putative protein-coding transcripts.

326 The assignment of transcripts to GO terms was possible for 25,184 (83.31%) of  
327 30,227 putative protein-coding sequences, allowing GO enrichment analyses of the DETs.  
328 GO enrichment analyses were focused on biological processes potentially regulating the  
329 responses of *A. schaueriana* to the contrasting climatic variables in the Equatorial and  
330 Subtropical sites (Table 1, Supplemental Fig. 1). Analyses were conducted separately for  
331 leaves and stems and for each of two sets of DETs: one showed higher expression levels in  
332 Equatorial than in Subtropical samples (which we refer to these as DET-Eq) and the other  
333 showed higher abundance in Subtropical than in Equatorial samples (which are referred as  
334 DET-St). The enriched processes among the sets of DET included photosynthesis; plant  
335 responses to UV, temperature stimulus and water stress; cell wall biosynthesis and cellular  
336 respiration (Supplemental Tables 7-11, Supplemental Fig. 7i-l).

337 *Photosynthesis:* Among the DET-St, we observed various putative genes participating  
338 in the biosynthesis of the photosynthetic apparatus, chlorophyll and photoreceptors; the  
339 function of electron transporters and chloroplast movement coordination. Contrastingly, the  
340 DET-Eq set showed enrichment in transcripts similar to proteins required for disassembling  
341 the light-harvesting complex of photosystem II in thylakoid membranes and for triggering  
342 chlorophyll degradation (Park et al., 2007) (Supplemental Table 11).

343 *Response to UV:* Both the DET-St and DET-Eq sets showed enrichment in functions  
344 related to the response to UV-light, however, the transcript annotations differed between these  
345 sets. The DET-St set included putative UV-B protectants and genes involved in UV-B-  
346 induced antioxidants biosynthesis, such as plastid copper/zinc superoxide dismutases,  
347 photosystem II repair proteins, and L-ascorbic acid. In contrast, the DET-Eq set showed



348 enrichment of transcripts associated with photo-oxidative damage reduction and the positive  
349 regulation of anthocyanin biosynthesis in response to UV. Antioxidants induced by UV  
350 irradiation (Myouga et al., 2008), such as putative iron superoxide dismutases and pyridoxine  
351 biosynthesis genes, were among the DET-Eq (Supplemental Table 11).

352         *Response to temperature:* In the DET-St set, we observed putative genes presenting  
353 critical roles in chloroplast protein translation during cold acclimation and that provide  
354 tolerance to chilling temperatures (Goulas et al., 2006; S. Wang et al., 2016). For instance,  
355 transcripts similar to the *GLYCINE-RICH RNA-BINDING PROTEIN (RZIA)*, which has a  
356 chaperone activity during cold acclimation (Kim, Kim, & Kang, 2005), and to the cold-  
357 inducible ATP-dependent *DNA HELICASE ATSGS1*, required for DNA damage-repair  
358 (Hartung, Suer, & Puchta, 2007). Interestingly, DET-St included a putative *AGAMOUS-LIKE*  
359 *24 (AGL24)* transcription factor, which is involved in vernalisation-induced floral transition  
360 (Michaels et al., 2003). Contrastingly, various transcripts similar to heat shock-inducible  
361 chaperones and to *ADENINE NUCLEOTIDE ALPHA HYDROLASE-LIKE PROTEIN*  
362 *(AT3G53990)*, involved in chaperone-mediated protein folding (Jung et al., 2015), were  
363 among the DET-Eq set, potentially enhancing tolerance to heat in equatorial plants.  
364 Additionally, a transcript similar to the *ETHYLENE-RESPONSIVE ELEMENT BINDING*  
365 *PROTEIN (RAP2.3)*, which confers resistance to heat and hydrogen peroxide (Ogawa et al.,  
366 2005), was observed in this group (Supplemental Table 11).

367         *Response to water stress:* Transcripts associated with the response and tolerance to  
368 water deficits and with cellular ion homeostasis and osmotic adjustment were enriched among  
369 DET-Eq. For instance, a transcript similar to the *ETHYLENE-RESPONSIVE*  
370 *TRANSCRIPTION FACTOR (RAP2.4)*, which regulates the expression of several drought-  
371 responsive genes, including aquaporins (Lin, Park, & Wang, 2008; Rae, Lao, & Kavanagh,

2011), was identified in DET-Eq. Accordingly, a putative aquaporin *PLASMA MEMBRANE*  
*INTRINSIC PROTEIN (PIPI;4)* (Alexandersson et al., 2005) was also found in this set. We  
observed in DET-Eq putative genes participating in the synthesis of raffinose, an  
osmoprotective soluble trisaccharide (Nishizawa, Yabuta, & Shigeoka, 2008), and also  
transcripts similar to osmosensitive ion channels belonging to the *EARLY-RESPONSIVE TO*  
*DEHYDRATION STRESS FAMILY*. Correspondingly, we observed an ion channel protein,  
*SLAC1 HOMOLOGUE 3 (SLAH3)*, required for stomatal closure induced by drought stress  
(A. Zhang et al., 2016), and the putative *NINE-CIS-EPOXYCAROTENOID DIOXYGENASE 3*  
(*NCED3*), which increases plant resistance to water deficit through the accumulation of  
abscisic acid (ABA), leading to stomatal closure. Possibly as a consequence of decreased  
stomatal conductance, a transcript similar to the *ALANINE-GLYOXYLATE*  
*AMINOTRANSFERASE 2 HOMOLOG 3 (AT3G08860)*, which plays a central role in  
photorespiration (Liepman & Olsen, 2003), showed higher expression in Equatorial than in  
Subtropical samples (Supplemental Table 11).

*Cell wall biosynthesis:* Transcripts similar to 33 distinct proteins and transcription  
factors that play central roles in the biosynthesis and deposition of cell wall components, such  
as cellulose, hemicellulose, lignin and pectin, were identified among DET-Eq (Supplemental  
Table 10).

*Cellular respiration:* DET-Eq included one putative enzyme from the tricarboxylic  
acid cycle encoded in the nuclear genome, *ACONITASE 3 (ACO3)*, which converts citrate to  
isocitrate, and several mitochondrial genes encoding subunits of NADH dehydrogenases,  
ATP-synthases and cytochrome C oxidases (Supplemental Table 11).

394 We confirmed the results obtained in the computational analyses of RNA-Seq data by  
395 qRT-PCR of ten DET detected across all leaf samples (Supplemental Fig. 8, Supplemental  
396 Table 12, Supplemental Results).

397

### 398 ***Detection of SNP with signs of selection***

399 To complement the analyses of differential gene expression, which could result from  
400 plasticity and adaptive selection (Wolf, Lindell, & Backstrom, 2010), we searched for gene  
401 sequence variation among trees sampled along the Atlantic coast of South America (Fig. 1,  
402 Supplemental Table 2). After quality filtering of the sequenced data, we selected 77  
403 individuals without evidence of interspecific hybridisation with *A. germinans* for downstream  
404 analyses. We identified a set of 6,170 high-quality unlinked biallelic SNP loci with a minor  
405 allele frequency  $\geq 0.05$  and  $\geq 8x$  coverage. The overall genetic structure corroborated a  
406 previous study based on putatively neutral microsatellite loci (Mori et al., 2015), dividing the  
407 samples into two main groups: north and south of the NEESA (Supplemental Fig. 9).

408 We observed 122 loci showing significant departures from neutral expectations of  
409 interpopulational divergence, as conservatively detected (Ahrens et al., 2018) by both pcadapt  
410 and LOSITAN. Fifteen of these loci with putative signs of selection were aligned to *A.*  
411 *schaueriana* transcripts that were similar to gene models in *A. thaliana* and *S. indicum*  
412 (Supplemental Table 13), enabling screening for their potential functional roles. However,  
413 five of the reference proteins did not have informative functions described for the model  
414 plant, hindering inferences regarding their function. Conversely, among the remaining  
415 annotated candidates, we found five putative genes involved in processes related to the  
416 contrasting equatorial and subtropical environments (Fig. 4). One candidate locus was  
417 detected in the putative transcription factor *RAP2.4*, which is induced in response to water and

418 salt stress and regulates developmental processes mediated by light intensity (Lin et al., 2008)  
419 and the expression of aquaporins (Rae et al., 2011), which plays a role in plant water  
420 homeostasis. Two other candidates showed similarity with the transcription factors *ZINC-*  
421 *FINGER PROTEIN 1 (ZFNI)*, involved in the regulation of the expression of several water  
422 stress genes (Sakamoto, Araki, Meshi, & Iwabuchi, 2000), and *HYPOXIA RESPONSE*  
423 *ATTENUATOR (HRA1)*, strongly induced in response to low oxygen levels (Giuntoli et al.,  
424 2014). A putative *UDP GLUCOSYL TRANSFERASE*, an enzyme that catalyses the final step  
425 of anthocyanin biosynthesis wherein pigmentation is produced (Tohge et al., 2005), also  
426 showed evidence of positive selection. Additionally, one candidate locus was found in a  
427 transcript similar to a *TETRATRICOPEPTIDE REPEAT PROTEIN (AT2G20710, TPR)*,  
428 which might play a role in the biogenesis of the photosynthetic apparatus (Bohne,  
429 Schwenkert, Grimm, & Nickelsen, 2016).

## 430 **Discussion**

431 We used complementary ecological and molecular approaches to study non-neutral  
432 phenotypic and genetic divergences as well as the contribution of contrasting environmental  
433 forces between two populations of the mangrove species *Avicennia schaueriana*. The genetic  
434 structure previously detected with a few microsatellite loci between forests occurring north  
435 and south of the NEESA (Mori et al., 2015) was confirmed using thousands of genome-wide  
436 SNP (Supplemental Fig. 9). Equatorial plants showed morphophysiological and  
437 transcriptomic signals that appear to minimise the effects of drought, high light and heat,  
438 whereas traits observed in Subtropical plants suggest a maximisation of carbon assimilation,  
439 which may be beneficial under low temperature and reduced light regime (Fig. 2-3,  
440 Supplemental Table 11). Additionally, putative signs of selection were identified in

441 transcripts associated with contrasting climate variables between equatorial and subtropical  
442 latitudes (Fig. 4).

443        Traits exhibited by Equatorial plants relative to Subtropical plants in the common  
444 garden experiment, such as reduced leaf size, smaller leaf angle, higher levels of red light-  
445 reflecting pigments, narrower vessels and lower rates of stomatal conductance, limit carbon  
446 acquisition (Reef & Lovelock, 2015) and may have imposed constraints to carbon gain in  
447 Equatorial plants, which also accumulated less biomass (Fig. 2-3, Supplemental Fig. 3-4). In  
448 contrast, such characteristics allow plants to maintain suitable leaf temperature for  
449 photosynthesis while reducing both UV exposure and water loss through the minimisation of  
450 evaporative cooling (Reef & Lovelock, 2015; Steyn, Wand, Holcroft, & Jacobs, 2002). We  
451 argue that the prevalence of these traits among Equatorial samples may be advantageous in  
452 their natural environment, especially during the dry season (from August to December),  
453 which presents high light intensity, frequently combined with high temperature (> 30 °C) and  
454 air humidity below 70% (Table 1, Supplemental Fig. 1). Under high evaporative demand and  
455 saline intertidal soils, water acquisition has an elevated energetic cost, representing strong  
456 pressure in favour of water-saving adaptations (Reef & Lovelock, 2015). Accordingly,  
457 Equatorial plants also showed lower transpiration rates than did Subtropical plants in the  
458 common garden (Supplemental Fig. 4). In addition, 63% of the six-month-old Equatorial  
459 plants started flowering from July-August (Supplemental Fig. 4g), which is consistent with  
460 phenological observations reported for *A. schaueriana* in equatorial sites (Menezes, Berger, &  
461 Mehlig, 2008). However, we found no previous records of six-month-old flowering plants in  
462 the literature. Although a flowering peak is observed in August in southern subtropical forests  
463 (De Alvarenga, Botosso, & Soffiatti, 2017), Subtropical plants did not flower during the  
464 glasshouse experiment. Early flowering is a phenotype with complex genetic components and

465 is rarely studied in non-model organisms; however it is renowned as an adaptive mechanism  
466 for maximising the chance of reproduction under stress (Kazan & Lyons, 2016).

467         Contrastingly, Subtropical plants showed higher stomatal conductance and  
468 transpiration rates, higher levels of green light-reflecting pigments, larger leaf area, wider leaf  
469 lamina angle and larger xylem vessel diameter than did Equatorial plants in the common  
470 garden experiment (Fig. 2-3, Supplemental Fig. 3-4). These characteristics enhance light  
471 energy absorbance and carbon acquisition at the expense of greater water loss and higher  
472 cavitation risk (Carlson, Holsinger, & Prunier, 2011; Stuart, Choat, Martin, Holbrook, & Ball,  
473 2006). These traits may compensate for declines in net primary production in higher-latitude  
474 environments (Saenger & Snedaker, 1993) that result from restrictions in temperature and  
475 solar irradiance (Table 1, Supplemental Fig. 1). We argue that the intensity of cold events in  
476 southern subtropical populations of *A. schaueriana* is likely insufficient to favour the  
477 selection of freezing-tolerant individuals, in contrast to results reported for *A. germinans* at its  
478 northernmost distribution limit on the Atlantic coast of North America (Cavanaugh et al.,  
479 2014). At the southernmost range edge of *A. schaueriana*, the minimum air temperature does  
480 not drop below 0 °C (Table 1, Supplemental Fig. 1), which is higher than the expected  
481 mangrove physiological threshold (Osland et al., 2017). Additionally, the small population  
482 size of *A. schaueriana* at this location (Soares et al., 2012) and the arrival of maladapted  
483 propagules from northerly populations likely reduce the potential strength of selection  
484 favouring cold-adapted individuals.

485         Functional interpopulation divergence at the molecular level was evident under field  
486 conditions. Comparative transcriptomics of trees sampled in their native habitats corroborated  
487 the suggested effects of environmental variation in light availability, temperature and water  
488 stress on the phenotypic divergence observed in the common garden experiment. The

489 transcriptomic profiles obtained at the beginning of the dry season in the Equatorial site and at  
490 the end of winter in the Subtropical site (Supplemental Table 1) showed an enrichment of  
491 DETs involved in photosynthesis, cellular respiration, cell wall biosynthesis and plant  
492 responses to water stress, temperature and UV light (Supplemental Fig. 7i-l). The adaptive  
493 relevance of these biological processes in the field was highlighted through the identification  
494 and functional annotation of SNPs putatively under natural selection from populations along  
495 the *A. schaueriana* geographic distribution (Supplemental Table 13). In the following  
496 subsections, we integrate information derived from three independent approaches explored in  
497 this work.

498

#### 499 ***Water stress as a key selective pressure in equatorial populations of A. schaueriana***

500 The increased levels of transcripts similar to heat-shock proteins, to drought-induced  
501 ion transporters, and genes that enhance heat tolerance and play central roles in stomatal  
502 closure and photorespiration provided multiple lines of evidence of water stress in Equatorial  
503 samples. Additionally, Equatorial plants exhibited higher expression of aquaporins and genes  
504 involved in the accumulation of organic solutes than did Subtropical plants. These  
505 investments improve tolerance to drought (Nishizawa et al., 2008) by lowering cell water  
506 potential and actively transporting water through proteins in the cell membrane rather than  
507 using passive apoplastic transport (Krishnamurthy et al., 2014; Reef & Lovelock, 2015).  
508 Enhanced rigidity of cells reduces risks of damage during dehydration and rehydration,  
509 thereby improving resistance to high extra-cellular osmotic pressure (Gall et al., 2015). Thus,  
510 we argue that the higher expression of several transcripts associated with cell wall  
511 biosynthesis and cell wall thickening in the Equatorial samples may indicate plant responses  
512 to water stress. Further evidences of the relevance of water stress in plants at the Equatorial

513 site were highlighted by the identification of sequence divergence between northerly and  
514 southerly populations in two putative osmotic stress-responsive regulatory transcription  
515 factors (*RAP2.4* and *ZFNI*). These findings corroborate with the divergence in traits involved  
516 in water balance between plants from Equatorial and Subtropical sites, such as vessel  
517 diameter, leaf size, leaf angle and transpiration and stomatal conductance rates (Fig. 2,  
518 Supplemental Fig. 3-4).

519

520 ***Latitudinal variation in light quality and intensity may shape functional diversity in A.***  
521 ***schaueriana***

522         Contrasting seasonal fluctuations in photoperiod and in light quality between low and  
523 high latitudes (Pecot, Horsley, Battaglia, & Mitchell, 2005) (Table 1) likely influence the  
524 differential expression observed in putative UV-inducible antioxidant and photodamage repair  
525 genes. The adaptive relevance of these findings is supported by the sign of natural selection  
526 found in a transcript similar to *UDP-GLUCOSYL TRANSFERASE*, a key enzyme to  
527 anthocyanin biosynthesis, which confers protection to UV-B. Divergent morphological traits  
528 between Equatorial and Subtropical plants grown in the common garden experiment,  
529 including leaf inclination angle and stem light reflectance (Fig. 2 and 3) provide additional  
530 insights into *A. schaueriana* light-related adaptations.

531

532 ***Low water and low light availability presumably affect photosynthesis and cellular***  
533 ***respiration***

534         In response to abiotic stress conditions such as drought, heat and high light, plants  
535 optimise the use of light energy and minimise photooxidative damage by reducing the  
536 photosynthetic activity via the repression of light-harvesting and photosystem-component



537 genes (Bray, 2004; Han et al., 2009; Kimura et al., 2003; Moumeni et al., 2011; D. Wang et  
538 al., 2011; C. Zhang et al., 2015). We argue that the lower expression of photosynthesis genes  
539 in Equatorial than in Subtropical samples likely is further indicative of the role of water stress  
540 in shaping divergent phenotypes in the field, but it may also result in the enhanced absorption  
541 of light energy in Subtropical plants. Accordingly, we identified increased expression of  
542 transcripts associated with chlorophyll biosynthesis among the DET-St set members and with  
543 chlorophyll breakdown and leaf senescence among DET-Eq. Chlorophyll degradation  
544 followed by leaf senescence allows the remobilisation of nutrients and reduces the water loss  
545 through transpiration, contributing to water balance and drought tolerance (Munné-Bosch &  
546 Alegre, 2004). Additionally, we detected a putative signature of selection in a transcript  
547 similar to a *TPR* protein, required for chlorophyll synthesis and for the biogenesis of the  
548 photosynthetic apparatus (Bohne et al., 2016). We suggest that differential seasonality in light  
549 and water availability between subtropical and equatorial latitudes may be involved in the  
550 divergence of non-neutral variability in the species. Corroborating the results obtained from  
551 the genomic approaches, we observed functional trait divergence related to water use and  
552 light energy absorbance in plants from contrasting latitudes cultivated under the same  
553 conditions (Fig. 2-3, Supplemental Fig. 3-4).

554 Mitochondrial activity is strongly connected to photosynthesis and chloroplasts  
555 function since it generates ATP for carbohydrate synthesis, plays a role in protecting  
556 chloroplasts against photoinhibition, participates in dissipating reducing equivalents and  
557 exchanges metabolites with chloroplasts during photorespiration (Millar, Whelan, Soole, &  
558 Day, 2011; Raghavendra & Padmasree, 2003). Cellular respiration also provides ATP and  
559 carbon compounds for secondary metabolism, playing fundamental roles in responses to  
560 abiotic stresses, including drought (Atkin & Macherel, 2009; Millar et al., 2011). We suggest

561 that higher expression levels of cellular respiration genes in Equatorial than in Subtropical  
562 samples may be a consequence of the reduced expression of photosynthesis genes and the  
563 enhanced energetic demand caused by water stress.

564

565 ***Tidal amplitude variation with latitude as a diverging force along the Atlantic coast of***  
566 ***South America***

567 Tidal amplitude is markedly reduced with increasing latitude along the Atlantic coast  
568 of South America, ranging from greater than 4 m at low latitudes to less than 1 m at high  
569 latitudes (Schaeffer-Novelli, Cintrón-Molero, Adaime, & de Camargo, 1990). The wide  
570 variation in tidal amplitude exposes trees to varied durations of hypoxia. The identification of  
571 a candidate SNP locus with a putative sign of selection in a transcription factor induced by  
572 oxygen deprivation (*HRAI*) may indicate that differential tidal variation acts as a diverging  
573 selective force between northerly equatorial and southerly subtropical populations of *A.*  
574 *schaueriana*. The *HRAI* putative homolog also showed 1.75-fold higher expression in  
575 Subtropical leaves relative to that in Equatorial leaves under field conditions. However, we  
576 did not detect evidences at the phenotypic level in the common garden experiment suggesting  
577 the relevance of this environmental variable.

578

579 ***Climate change and conservation implications of the results***

580 The functional divergence described herein might differentially affect the sensitivity  
581 of *A. schaueriana* populations to a rapidly changing climate. Although there is no evidence of  
582 mangrove expansion at its southernmost range limit in the Americas (Soares et al., 2012),  
583 researchers suggest that subtropical populations could expand polewards in the near future as  
584 a result from the increased air and ocean temperatures and CO<sub>2</sub> concentrations (Godoy & De

585 Lacerda, 2015). We expect that the more acquisitive traits, in terms of gene expression in the  
586 field and in morphophysiology in the common garden experiment, exhibited by plants from  
587 the subtropical range edge may indeed favour growth under increased temperatures and  
588 rainfall (Pachauri & Meyer, 2014). However, due to the low tidal variation (< 1 m) observed  
589 at the southernmost mangrove distribution edge along the Atlantic coast of South America, a  
590 greater relocation of forests will be required for species to keep pace with the rising sea level  
591 (Ellison, 2015). In this context, dense human coastal occupations combined with the narrow  
592 intertidal zones, characteristic of this region, make mangroves at higher latitudes more  
593 vulnerable to habitat loss than in the equatorial region of the Atlantic coast of South America.  
594 We expect that in contrast, despite having wider coastal plains potentially available for  
595 expansion, we expect that Equatorial populations of *A. schaueriana* might be threatened by  
596 the increased mean temperatures and decreased precipitation during the El Niño-Southern  
597 Oscillation events (Pachauri & Meyer, 2014). Increased leaf temperature stimulates  
598 respiration (Heskel et al., 2016) and photorespiration (Jordan & Ogren, 1984) and might  
599 offset the benefits in carbon acquisition caused by increased CO<sub>2</sub> concentration (Drake,  
600 González-Meler, & Long, 1997). The critical temperature threshold for photosynthesis is  
601 likely to be overcome more frequently in the near future, possibly reducing carbon  
602 assimilation and productivity (Saenger & Moverly, 1985) and, in extreme cases, causing  
603 biomass loss triggered by cavitation or carbon starvation (Doughty et al., 2015; Rowland et  
604 al., 2015).

605 For the definition of short-term mangrove conservation plans, such as the reforestation  
606 or restoration of degraded areas on the Atlantic coast of South America, we recommend that  
607 populations occurring north and south of the NEESA should warrant attention as distinct  
608 conservation management units (Moritz, 1994).

609

## 610 **Conclusions**

611         Based on the combined analysis of our results, we argue that carbon acquisition in  
612 plants in equatorial region may be limited by the longer exposure to hypoxia, the higher  
613 vapour pressure deficit (VPD) and the higher solar irradiance, especially during the hot and  
614 dry season. Furthermore, we argue that in subtropical regions, limitations in carbon gain may  
615 result from the lower solar irradiance levels, the lower temperature and the shorter  
616 photoperiod during winter (Fig. 4). These environmental differences between equatorial and  
617 subtropical latitudes presumably control gene expression in the field, and remarkably, they  
618 may have shaped both allele frequencies in genes responding to these variables and  
619 morphophysiological traits observed in *A. schaueriana* individuals (Fig. 4). The emergence of  
620 this divergence is facilitated by the limited gene flow identified between populations north  
621 and south of the NEESA, possibly driven by the movements of the major ocean currents that  
622 are active along the Atlantic coast of South America (Fig. 1). Because a similar north-south  
623 structure of neutral diversity is also observed for other mangrove and mangrove-associated  
624 species on the Atlantic coast of South America (Francisco et al., 2018; Mori et al., 2015;  
625 Takayama et al., 2008), it is plausible that the environmental drivers of adaptive divergence in  
626 *A. schaueriana* play roles in the divergence of other species.

627         In addition to revealing that northerly and southerly populations of *A. schaueriana* are  
628 genetically and functionally distinct units (Wee et al., 2018), we have provided an in-depth  
629 empirical evaluation of the intraspecific variation of a long-living, non-model tree. These  
630 results should allow clearer predictions of how *A. schaueriana* and potentially other coastal  
631 plants may respond to current global climate changes by accounting for phenotypically

632 (Moran et al., 2016) and genetically (Ikeda et al., 2017) informed mangrove distribution  
633 modelling.

## 634 **Acknowledgements**

635 We thank Professors Dr. Michel A. G. Vincentz and Dr. Juliana L. S. Mayer for  
636 advising and making available their laboratory for our training and performing of RNA  
637 extraction and slide preparation for the analyses of wood anatomy. We acknowledge Ilmarina  
638 C. de Menezes and Stephanie K. Bajay for assistance in the field. We thank Stephanie K.  
639 Bajay for providing assistance in the germination of the propagules used in the common  
640 garden experiment. And we thank Greg Mellers and Alessandro Alves-Pereira for critically  
641 reading the manuscript. M.V.C and G.M.M. received fellowships from the São Paulo  
642 Research Foundation (FAPESP 2013/26793-7, 2013/08086-1 and 2014/22821-9). M.V.C.  
643 received a fellowship from the Coordination for the Improvement of Higher Education  
644 Personnel (CAPES 8084/2015-07). G.M.M. received a grant from the Brazilian National  
645 Council for Scientific and Technological Development (CNPq 448286/2014-9). A.P.S.  
646 received a research fellowship from CNPq (309661/2014-5).

## 647 **References**

- 648 Ahrens, C. W., Rymer, P. D., Stow, A., Bragg, J., Dillon, S., Umbers, K. D. L., & Dudaniec,  
649 R. Y. (2018). The search for loci under selection: trends, biases and progress. *Molecular*  
650 *Ecology*. doi:doi.org/10.1111/mec.14549
- 651 Albert, C. H., Grassein, F., Schurr, F. M., Vieilledent, G., & Violle, C. (2011). When and how  
652 should intraspecific variability be considered in trait-based plant ecology? *Perspectives*  
653 *in Plant Ecology, Evolution and Systematics*, 13(3), 217–225.  
654 doi:10.1016/j.ppees.2011.04.003
- 655 Alexander, D. H., Novembre, J., & Lange, K. (2009). Fast model-based estimation of ancestry  
656 in unrelated individuals. *Genome Research*, 19(9), 1655–1664.  
657 doi:10.1101/gr.094052.109
- 658 Alexandersson, E., Fraysse, L., Sjövall-Larsen, S., Gustavsson, S., Fellert, M., Karlsson, M.,  
659 ... Kjellbom, P. (2005). Whole gene family expression and drought stress regulation of  
660 aquaporins. *Plant Molecular Biology*, 59(3), 469–484. doi:10.1007/s11103-005-0352-1
- 661 Alongi, D. M. (2015). The Impact of Climate Change on Mangrove Forests. *Curr. Clim.*

- 662 *Change Rep.*, 4, 516. doi:10.1007/s40641-015-0002-x
- 663 Alvares, C. A., Stape, J. L., Sentelhas, P. C., Gonçalves, J. L. de M., & Sparovek, G. (2013).  
664 Köppen's climate classification map for Brazil. *Meteorologische Zeitschrift*, 22(6), 711–  
665 728. doi:10.1127/0941-2948/2013/0507
- 666 Andrews, K. R., Good, J. M., Miller, M. R., Luikart, G., & Hohenlohe, P. A. (2016).  
667 Harnessing the power of RADseq for ecological and evolutionary genomics. *Nature*  
668 *Reviews Genetics*, 17(2), 81–92. doi:10.1038/nrg.2015.28
- 669 Antao, T., Lopes, A., Lopes, R. J., Beja-Pereira, A., & Luikart, G. (2008). LOSITAN: A  
670 workbook to detect molecular adaptation based on a F<sub>st</sub>-outlier method. *BMC*  
671 *Bioinformatics*, 9(1), 1–5. doi:10.1186/1471-2105-9-323
- 672 Atkin, O. K., & Macherel, D. (2009). The crucial role of plant mitochondria in orchestrating  
673 drought tolerance. *Annals of Botany*, 103(4), 581–597. doi:10.1093/aob/mcn094
- 674 Barrett, R. D. H., & Hoekstra, H. E. (2011). Molecular spandrels: tests of adaptation at the  
675 genetic level. *Nature Reviews Genetics*, 12(11), 767–780. doi:10.1038/nrg3015
- 676 Berardini, T. Z., Reiser, L., Li, D., Mezheritsky, Y., Muller, R., Strait, E., & Huala, E. (2015).  
677 The Arabidopsis Information Resource  $\square$ : Making and Mining the “Gold Standard”  
678 Annotated Reference Plant Genome. *Genesis*, 53, 474–485. doi:10.1002/dvg.22877
- 679 Blake, J. A., Christie, K. R., Dolan, M. E., Drabkin, H. J., Hill, D. P., Ni, L., ... Westerfeld,  
680 M. (2015). Gene ontology consortium: Going forward. *Nucleic Acids Research*, 43,  
681 D1049–D1056. doi:10.1093/nar/gku1179
- 682 Bohne, A. V., Schwenkert, S., Grimm, B., & Nickelsen, J. (2016). *Roles of Tetratricopeptide*  
683 *Repeat Proteins in Biogenesis of the Photosynthetic Apparatus*. *International Review of*  
684 *Cell and Molecular Biology* (Vol. 324). Elsevier Inc. doi:10.1016/bs.ircmb.2016.01.005
- 685 Bray, E. A. (2004). Genes commonly regulated by water-deficit stress in Arabidopsis  
686 thaliana. *Journal of Experimental Botany*, 55(407), 2331–2341. doi:10.1093/jxb/erh270
- 687 Camacho, C., Coulouris, G., Avagyan, V., Ma, N., Papadopoulos, J., Bealer, K., & Madden,  
688 T. L. (2009). BLAST+: architecture and applications. *BMC Bioinformatics*, 10, 421.  
689 doi:10.1186/1471-2105-10-421
- 690 Carlson, J. E., Holsinger, K. E., & Prunier, R. (2011). Plant responses to climate in the cape  
691 floristic region of South Africa: Evidence for adaptive differentiation in the proteaceae.  
692 *Evolution*, 65(1), 108–124. doi:10.1111/j.1558-5646.2010.01131.x
- 693 Cavanaugh, K. C., Kellner, J. R., Forde, A. J., Gruner, D. S., Parker, J. D., Rodriguez, W., &  
694 Feller, I. C. (2014). Poleward expansion of mangroves is a threshold response to  
695 decreased frequency of extreme cold events. *Proceedings of the National Academy of*  
696 *Sciences of the United States of America*, 111(2), 723–7. doi:10.1073/pnas.1315800111
- 697 Danecek, P., Auton, A., Abecasis, G., Albers, C. A., Banks, E., DePristo, M. A., ... Durbin,  
698 R. (2011). The variant call format and VCFtools. *Bioinformatics*, 27(15), 2156–2158.  
699 doi:10.1093/bioinformatics/btr330
- 700 De Alvarenga, A. M. S. B., Botosso, P. C., & Soffiatti, P. (2017). Stem growth and phenology  
701 of three subtropical mangrove tree species. *Brazilian Journal of Botany*.  
702 doi:10.1007/s40415-017-0397-9
- 703 Doughty, C. E., Metcalfe, D. B., Girardin, C. A. J., Amézquita, F. F., Cabrera, D. G., Huasco,  
704 W. H., ... Malhi, Y. (2015). Drought impact on forest carbon dynamics and fluxes in  
705 Amazonia. *Nature*, 519(7541), 78–82. doi:10.1038/nature14213
- 706 Drake, B. G., González-Meler, M. A., & Long, S. P. (1997). More efficient plants: a  
707 consequence of rising atmospheric CO<sub>2</sub>? *Annual Review of Plant Physiology and Plant*  
708 *Molecular Biology*, 48(1), 609–639. doi:10.1146/annurev.arplant.48.1.609
- 709 Duke, N., Kovacs, J., Griffiths, A., Preece, L., J. E. Hill, D., Van Oosterzee, P., ... Burrows,



- 710 D. (2017). *Large-scale dieback of mangroves in Australia*. *Marine and Freshwater*  
711 *Research*. doi:10.1071/MF16322
- 712 Ellison, J. C. (2015). Vulnerability assessment of mangroves to climate change and sea-level  
713 rise impacts. *Wetlands Ecology and Management*, 23(2), 115–137. doi:10.1007/s11273-  
714 014-9397-8
- 715 Finn, R. D., Bateman, A., Clements, J., Coggill, P., Eberhardt, R. Y., Eddy, S. R., ... Punta,  
716 M. (2014). Pfam: The protein families database. *Nucleic Acids Research*, 42(D1), 222–  
717 230. doi:10.1093/nar/gkt1223
- 718 Forsythe, W. C., Rykiel, E. J., Stahl, R. S., Wu, H. i., & Schoolfield, R. M. (1995). A model  
719 comparison for daylength as a function of latitude and day of year. *Ecological*  
720 *Modelling*, 80(1), 87–95. doi:10.1016/0304-3800(94)00034-F
- 721 Francisco, P. M., Mori, G. M., Alves, F. M., Tambarussi, E., & Souza, A. P. De. (2018).  
722 Population genetic structure, introgression, and hybridization in the genus *Rhizophora*  
723 along the Brazilian coast. *Ecology and Evolution*, (January), 1–14.  
724 doi:10.1002/ece3.3900
- 725 Gall, H. Le, Philippe, F., Domon, J.-M., Gillet, F., Pelloux, J., & Rayon, C. (2015). Cell Wall  
726 Metabolism in Response to Abiotic Stress. *Plants*, 4(1), 112–166.  
727 doi:10.3390/plants4010112
- 728 Giuntoli, B., Lee, S. C., Licausi, F., Kosmacz, M., Oosumi, T., van Dongen, J. T., ... Perata,  
729 P. (2014). A Trihelix DNA Binding Protein Counterbalances Hypoxia-Responsive  
730 Transcriptional Activation in Arabidopsis. *PLoS Biology*, 12(9).  
731 doi:10.1371/journal.pbio.1001950
- 732 Godoy, M. D. P., & De Lacerda, L. D. (2015). Mangroves Response to Climate Change: A  
733 Review of Recent Findings on Mangrove Extension and Distribution. *Annals of the*  
734 *Brazilian Academy of Sciences*, 87(2), 651–667. doi:10.1590/0001-3765201520150055
- 735 Goulas, E., Schubert, M., Kieselbach, T., Kleczkowski, L. A., Gardestro, P., & Schro, W.  
736 (2006). The chloroplast lumen and stromal proteomes of *Arabidopsis thaliana* show  
737 differential sensitivity to short- and long-term exposure to low temperature. *The Plant*  
738 *Journal*, 47, 720–734. doi:10.1111/j.1365-313X.2006.02821.x
- 739 Han, F., Chen, H., Li, X. J., Yang, M. F., Liu, G. S., & Shen, S. H. (2009). A comparative  
740 proteomic analysis of rice seedlings under various high-temperature stresses. *Biochimica*  
741 *et Biophysica Acta*, 1794(11), 1625–1634. doi:10.1016/j.bbapap.2009.07.013
- 742 Hartung, F., Suer, S., & Puchta, H. (2007). Two closely related RecQ helicases have  
743 antagonistic roles in homologous recombination and DNA repair in *Arabidopsis thaliana*.  
744 *Proceedings of the National Academy of Sciences*, 104(47), 18836–18841.  
745 doi:10.1073/pnas.0705998104
- 746 Hereford, J. (2009). A Quantitative Survey of Local Adaptation and Fitness Trade-Offs. *The*  
747 *American Naturalist*, 173(5), 579–588. doi:10.1086/597611
- 748 Heskell, M. A., O’Sullivan, O. S., Reich, P. B., Tjoelker, M. G., Weerasinghe, L. K.,  
749 Penillard, A., ... Atkin, O. K. (2016). Convergence in the temperature response of leaf  
750 respiration across biomes and plant functional types. *Proceedings of the National*  
751 *Academy of Sciences*, 113(14), 3832–3837. doi:10.1073/pnas.1520282113
- 752 Hijmans, R. J., Cameron, S. E., Parra, J. L., Jones, P. G., & Jarvis, A. (2005). Very high  
753 resolution interpolated climate surfaces for global land areas. *International Journal of*  
754 *Climatology*, 25(15), 1965–1978. doi:10.1002/joc.1276
- 755 Huang, J., Lu, X., Zhang, W., Huang, R., Chen, S., & Zheng, Y. (2014). Transcriptome  
756 Sequencing and Analysis of Leaf Tissue of *Avicennia marina* Using the Illumina  
757 Platform. *PLoS ONE*, 9(9), e108785. doi:10.1371/journal.pone.0108785

- 758 Ikeda, D. H., Max, T. L., Allan, G. J., Lau, M. K., Shuster, S. M., & Whitham, T. G. (2017).  
759 Genetically informed ecological niche models improve climate change predictions.  
760 *Global Change Biology*, 23(1), 164–176. doi:10.1111/gcb.13470
- 761 Jombart, T., Devillard, S., & Balloux, F. (2010). Discriminant analysis of principal  
762 components: a new method for the analysis of genetically structured populations. *BMC*  
763 *Genetics*, 11(1), 94. doi:10.1186/1471-2156-11-94
- 764 Jordan, D., & Ogren, W. (1984). The CO<sub>2</sub>/O<sub>2</sub> specificity of ribulose 1,5-bisphosphate  
765 carboxylase/oxygenase. *Planta*, 161(4), 308–313. doi:10.1007/BF00398720
- 766 Jung, Y. J., Melencion, S. M. B., Lee, E. S., Park, J. H., Alinapon, C. V., Oh, H. T., ... Lee, S.  
767 Y. (2015). Universal Stress Protein Exhibits a Redox-Dependent Chaperone Function in  
768 Arabidopsis and Enhances Plant Tolerance to Heat Shock and Oxidative Stress.  
769 *Frontiers in Plant Science*, 6, 1–11. doi:10.3389/fpls.2015.01141
- 770 Kawecki, T. J., & Ebert, D. (2004). Conceptual issues in local adaptation. *Ecology Letters*,  
771 7(12), 1225–1241. doi:10.1111/j.1461-0248.2004.00684.x
- 772 Kazan, K., & Lyons, R. (2016). The link between flowering time and stress tolerance. *Journal*  
773 *of Experimental Botany*, 67(1), 47–60. doi:10.1093/jxb/erv441
- 774 Kim, Y. O., Kim, J. S., & Kang, H. (2005). Cold-inducible zinc finger-containing glycine-rich  
775 RNA-binding protein contributes to the enhancement of freezing tolerance in  
776 Arabidopsis thaliana. *Plant Journal*, 42(6), 890–900. doi:10.1111/j.1365-  
777 313X.2005.02420.x
- 778 Kimura, M., Yamamoto, Y. Y., Seki, M., Sakurai, T., Sato, M., Abe, T., ... Matsui, M.  
779 (2003). Identification of Arabidopsis Genes Regulated by High Light – Stress Using  
780 cDNA Microarray. *Photochemistry and Photobiology*, 77(2), 226–233.  
781 doi:<https://doi.org/10.1562/0031-8655>
- 782 Kjerfve, B., Perillo, G. M. E., Gardner, L. R., Rine, J. M., Dias, G. T. M., & Mochel, F. R.  
783 (2002). Chapter Twenty Morphodynamics of muddy environments along the Atlantic  
784 coasts of North and South America. *Proceedings in Marine Science*, 4(C), 479–532.  
785 doi:10.1016/S1568-2692(02)80094-8
- 786 Krishnamurthy, P., Jyothi-Prakash, P. A., Qin, L., He, J., Lin, Q., Loh, C. S., & Kumar, P. P.  
787 (2014). Role of root hydrophobic barriers in salt exclusion of a mangrove plant  
788 *Avicennia officinalis*. *Plant, Cell and Environment*, 37(7), 1656–1671.  
789 doi:10.1111/pce.12272
- 790 Krishnamurthy, P., Mohanty, B., Wijaya, E., Lee, D., Lim, T., Lin, Q., ... Kumar, P. P.  
791 (2017). Transcriptomics analysis of salt stress tolerance in the roots of the mangrove  
792 *Avicennia officinalis*. *Nature Scientific Reports*, 7, 1–19. doi:10.1038/s41598-017-  
793 10730-2
- 794 Langmead, B., Trapnell, C., Pop, M., & Salzberg, S. (2009). Ultrafast and memory-efficient  
795 alignment of short DNA sequences to the human genome. *Genome Biol.*, 10(3), R25.  
796 doi:10.1186/gb-2009-10-3-r25
- 797 Li, W., & Godzik, A. (2006). Cd-hit: A fast program for clustering and comparing large sets  
798 of protein or nucleotide sequences. *Bioinformatics*, 22(13), 1658–1659.  
799 doi:10.1093/bioinformatics/btl158
- 800 Liepman, A. H., & Olsen, L. J. (2003). Alanine aminotransferase homologs catalyze the  
801 glutamate:glyoxylate aminotransferase reaction in peroxisomes of Arabidopsis. *Plant*  
802 *Physiology*, 131(January), 215–27. doi:10.1104/pp.011460
- 803 Lin, R. C., Park, H. J., & Wang, H. Y. (2008). Role of Arabidopsis RAP2.4 in regulating  
804 light- and ethylene-mediated developmental processes and drought stress tolerance.  
805 *Molecular Plant*, 1(1), 42–57. doi:10.1093/mp/ssm004



- 806 Loarie, S. R., Duffy, P. B., Hamilton, H., Asner, G. P., Field, C. B., & Ackerly, D. D. (2009).  
807 The velocity of climate change. *Nature*, *462*(7276), 1052–1055.  
808 doi:10.1038/nature08649
- 809 López-Medellín, X., Ezcurra, E., González-Abraham, C., Hak, J., Santiago, L. S., & Sickman,  
810 J. O. (2011). Oceanographic anomalies and sea-level rise drive mangroves inland in the  
811 Pacific coast of Mexico. *Journal of Vegetation Science*, *22*, 143–151.  
812 doi:10.1111/j.1654-1103.2010.01232.x
- 813 Lovelock, C. E., Cahoon, D. R., Friess, D. A., Guntenspergen, G. R., Krauss, K. W., Reef, R.,  
814 ... Triet, T. (2015). The vulnerability of Indo-Pacific mangrove forests to sea-level rise.  
815 *Nature*, *526*(7574), 559–563. doi:10.1038/nature15538
- 816 Luu, K., Bazin, E., & Blum, M. G. B. (2016). pcadapt: An R package to perform genome  
817 scans for selection based on principal component analysis. *Molecular Ecology*  
818 *Resources*, *33*, 67–77. doi:10.1111/1755-0998.12592
- 819 Lyu, H., Li, X., Guo, Z., He, Z., & Shi, S. (2017). De novo assembly and annotation of the  
820 *Avicennia officinalis* L. transcriptome. *Marine Genomics*, 2–5.  
821 doi:10.1016/j.margen.2017.07.002
- 822 McKee, K. L., Cahoon, D. R., & Feller, I. C. (2007). Caribbean mangroves adjust to rising  
823 sea level through biotic controls on change in soil elevation. *Global Ecology and*  
824 *Biogeography*, *16*(5), 545–556. doi:10.1111/j.1466-8238.2007.00317.x
- 825 McRae, G. J. (1980). A Simple Procedure for Calculating Atmospheric Water Vapor  
826 Concentration. *Journal of the Air Pollution Control Association*, *30*(4), 394–394.  
827 doi:10.1080/00022470.1980.10464362
- 828 Menezes, M. P. M. de, Berger, U., & Mehlig, U. (2008). Mangrove vegetation in Amazonia: a  
829 review of studies from the coast of Pará and Maranhão States, north Brazil. *Acta*  
830 *Amazonica*, *38*(3), 403–420. doi:10.1590/S0044-59672008000300004
- 831 Michaels, S. D., Ditta, G., Gustafson-Brown, C., Pelaz, S., Yanofsky, M., & Amasino, R. M.  
832 (2003). AGL24 acts as a promoter of flowering in *Arabidopsis* and is positively  
833 regulated by vernalization. *Plant Journal*, *33*, 867–874. doi:10.1046/j.1365-  
834 313X.2003.01671.x
- 835 Millar, A. H., Whelan, J., Soole, K. L., & Day, D. A. (2011). Organization and Regulation of  
836 Mitochondrial Respiration in Plants. *Annual Review of Plant Biology*, *62*(1), 79–104.  
837 doi:10.1146/annurev-arplant-042110-103857
- 838 Moran, E. V., Hartig, F., & Bell, D. M. (2016). Intraspecific trait variation across scales:  
839 Implications for understanding global change responses. *Global Change Biology*, *22*(1),  
840 137–150. doi:10.1111/gcb.13000
- 841 Mori, G. M., Zucchi, M. I., & Souza, A. P. (2015). Multiple-Geographic-Scale Genetic  
842 Structure of Two Mangrove Tree Species: The Roles of Mating System, Hybridization,  
843 Limited Dispersal and Extrinsic Factors. *Plos One*, *10*, e0118710.  
844 doi:10.1371/journal.pone.0118710
- 845 Moritz, C. (1994). Defining “Evolutionarily Significant Units” for conservation. *Trends in*  
846 *Ecology and Evolution*, *9*(10), 373–375. doi:10.1016/0169-5347(94)90057-4
- 847 Moumeni, A., Satoh, K., Kondoh, H., Asano, T., Hosaka, A., Venuprasad, R., ... Kikuchi, S.  
848 (2011). Comparative analysis of root transcriptome profiles of two pairs of drought-  
849 tolerant and susceptible rice near-isogenic lines under different drought stress. *BMC*  
850 *Plant Biology*, *11*. doi:10.1186/1471-2229-11-174
- 851 Munné-Bosch, S., & Alegre, L. (2004). Die and let live: Leaf senescence contributes to plant  
852 survival under drought stress. *Functional Plant Biology*, *31*(3), 203–216.  
853 doi:10.1071/FP03236

- 854 Myouga, F., Hosoda, C., Umezawa, T., Iizumi, H., Kuromori, T., Motohashi, R., ...  
855 Shinozaki, K. (2008). A Heterocomplex of Iron Superoxide Dismutases Defends  
856 Chloroplast Nucleoids against Oxidative Stress and Is Essential for Chloroplast  
857 Development in Arabidopsis. *The Plant Cell Online*, 20(11), 3148–3162.  
858 doi:10.1105/tpc.108.061341
- 859 Nishizawa, A., Yabuta, Y., & Shigeoka, S. (2008). Galactinol and Raffinose Constitute a  
860 Novel Function to Protect Plants from Oxidative Damage. *Plant Physiology*, 147(3),  
861 1251–1263. doi:10.1104/pp.108.122465
- 862 O’Leary, N. A., Wright, M. W., Brister, J. R., Ciufu, S., Haddad, D., McVeigh, R., ... Pruitt,  
863 K. D. (2016). Reference sequence (RefSeq) database at NCBI: Current status, taxonomic  
864 expansion, and functional annotation. *Nucleic Acids Research*, 44, D733–D745.  
865 doi:10.1093/nar/gkv1189
- 866 Ogawa, T., Pan, L., Kawai-Yamada, M., Yu, L.-H., Yamamura, S., Koyama, T., ...  
867 Uchimiya, H. (2005). Functional Analysis of Arabidopsis Ethylene-Responsive Element  
868 Binding Protein Conferring Resistance to Bax. *Plant Physiology*, 138, 1436–1445.  
869 doi:10.1104/pp.105.063586.1436
- 870 Oliveira, R. R., Viana, A. J. C., Reátegui, A. C. E., & Vincentz, M. G. A. (2015). An efficient  
871 method for simultaneous extraction of high-quality RNA and DNA from various plant  
872 tissues. *Genetics and Molecular Research*, 14(4), 18828–18838.  
873 doi:10.4238/2015.December.28.32
- 874 Osland, M. J., Feher, L. C., Griffith, K. T., Cavanaugh, K. C., Enwright, N. M., Day, R. H.,  
875 ... Rogers, K. (2017). Climatic controls on the global distribution, abundance, and  
876 species richness of mangrove forests. *Ecological Monographs*, 87(2), 341–359.  
877 doi:10.1002/ecm.1248
- 878 Pachauri, R. K., & Meyer, L. A. (Eds.). (2014). *Climate Change 2014: Synthesis Report.*  
879 *Contribution of Working Groups I, II and III to the Fifth Assessment Report of the*  
880 *Intergovernmental Panel on Climate Change. IPCC.* Geneva, Switzerland: IPCC.
- 881 Park, S.-Y., Yu, J.-W., Park, J.-S., Li, J., Yoo, S.-C., Lee, N.-Y., ... Paek, N.-C. (2007). The  
882 Senescence-Induced Staygreen Protein Regulates Chlorophyll Degradation. *The Plant*  
883 *Cell*, 19(5), 1649–1664. doi:10.1105/tpc.106.044891
- 884 Patel, R. K., & Jain, M. (2012). NGS QC toolkit: A toolkit for quality control of next  
885 generation sequencing data. *PLoS ONE*, 7(2). doi:10.1371/journal.pone.0030619
- 886 Pecot, S. D., Horsley, S. B., Battaglia, M. A., & Mitchell, R. J. (2005). The influence of  
887 canopy, sky condition, and solar angle on light quality in a longleaf pine woodland.  
888 *Canadian Journal of Forest Research*, 35(6), 1356–1366. doi:10.1139/x05-069
- 889 Rae, L., Lao, N. T., & Kavanagh, T. A. (2011). Regulation of multiple aquaporin genes in  
890 Arabidopsis by a pair of recently duplicated DREB transcription factors. *Planta*, 234(3),  
891 429–444. doi:10.1007/s00425-011-1414-z
- 892 Raghavendra, A. S., & Padmasree, K. (2003). Beneficial interactions of mitochondrial  
893 metabolism with photosynthetic carbon assimilation. *Trends in Plant Science*, 8(11),  
894 546–553. doi:10.1016/j.tplants.2003.09.015
- 895 Reef, R., & Lovelock, C. E. (2015). Regulation of water balance in Mangroves. *Annals of*  
896 *Botany*, 115(3), 385–395. doi:10.1093/aob/mcu174
- 897 Reef, R., Winter, K., Morales, J., Adame, M. F., Reef, D. L., & Lovelock, C. E. (2014). The  
898 effect of atmospheric carbon dioxide concentrations on the performance of the mangrove  
899 *Avicennia germinans* over a range of salinities. *Physiologia Plantarum*, 154(358–368).  
900 doi:10.1111/ppl.12289
- 901 Robinson, M. D., McCarthy, D. J., & Smyth, G. K. (2010). edgeR: a Bioconductor package

- 902 for differential expression analysis of digital gene expression data. *Bioinformatics*, 26(1),  
903 139–140. doi:10.1093/bioinformatics/btp616
- 904 Rowland, L., da Costa, A. C. L., Galbraith, D. R., Oliveira, R. S., Binks, O. J., Oliveira, A. A.  
905 R., ... Meir, P. (2015). Death from drought in tropical forests is triggered by hydraulics  
906 not carbon starvation. *Nature*, 528(7580), 119–122.  
907 doi:<https://doi.org/10.1038/nature15539>
- 908 Russello, M. A., Waterhouse, M. D., Etter, P. D., & Johnson, E. A. (2015). From promise to  
909 practice: pairing non-invasive sampling with genomics in conservation. *PeerJ*, 3, e1106.  
910 doi:10.7717/peerj.1106
- 911 Saenger, P., & Moverly, J. (1985). Vegetative phenology along the Queensland coastline.  
912 *Proceedings of the Ecological Society of Australia*, 13(January 1985), 257–265.
- 913 Saenger, P., & Snedaker, S. C. (1993). Pantropical trends in mangrove above-ground biomass  
914 and annual litterfall. *Oecologia*, 96(3), 293–299. doi:10.1007/BF00317496
- 915 Sakamoto, H., Araki, T., Meshi, T., & Iwabuchi, M. (2000). Expression of a subset of the  
916 Arabidopsis Cys2/His2-type zinc-finger protein gene family under water stress. *Gene*,  
917 248(1–2), 23–32. doi:10.1016/S0378-1119(00)00133-5
- 918 Savolainen, O., Lascoux, M., & Merilä, J. (2013). Ecological genomics of local adaptation.  
919 *Nature Reviews Genetics*, 14(11), 807–20. doi:10.1038/nrg3522
- 920 Savolainen, O., Pyhäjärvi, T., & Knürr, T. (2007). Gene Flow and Local Adaptation in Trees.  
921 *Annual Review of Ecology, Evolution and Systematics*, 38, 595–619.  
922 doi:10.1146/annurev.ecolsys.38.091206.095646
- 923 Sbrocco, E. J., & Barber, P. H. (2013). MARSPEC: ocean climate layers for marine spatial  
924 ecology. *Ecology*, 94(4), 979–979. doi:10.1890/12-1358.1
- 925 Schaeffer-Novelli, Y., Cintrón-Molero, G., Adaime, R. R., & de Camargo, T. M. (1990).  
926 Variability of mangrove ecosystems along the Brazilian coast. *Estuaries*, 13(2), 204–  
927 218. doi:10.1007/BF02689854
- 928 Schneider, C. A., Rasband, W. S., & Eliceiri, K. W. (2012). NIH Image to ImageJ: 25 years  
929 of image analysis. *Nature Methods*, 9(7), 671–675. doi:10.1038/nmeth.2089
- 930 Scholz, A., Klepsch, M., Karimi, Z., & Jansen, S. (2013). How to quantify conduits in wood?  
931 *Frontiers in Plant Science*, 4(March), 1–11. doi:10.3389/fpls.2013.00056
- 932 Shearman, P., Bryan, J., & Walsh, J. P. (2013). Trends in Deltaic Change over Three Decades  
933 in the Asia-Pacific Region. *Journal of Coastal Research*, 29(5), 1169–1183.  
934 doi:10.2112/JCOASTRES-D-12-00120.1
- 935 Simão, F. A., Waterhouse, R. M., Ioannidis, P., Kriventseva, E. V., & Zdobnov, E. M. (2015).  
936 BUSCO: Assessing genome assembly and annotation completeness with single-copy  
937 orthologs. *Bioinformatics*, 31(19), 3210–3212. doi:10.1093/bioinformatics/btv351
- 938 Soares, M. L. G., Estrada, G. C. D., Fernandez, V., & Tognella, M. M. P. (2012). Southern  
939 limit of the Western South Atlantic mangroves: Assessment of the potential effects of  
940 global warming from a biogeographical perspective. *Estuarine, Coastal and Shelf  
941 Science*, 101, 44–53. doi:10.1016/j.ecss.2012.02.018
- 942 Souza-Filho, P. W. M., Cohen, M. C. L., Lara, R. J., Lessa, G. C., Koch, B., & Behling, H.  
943 (2006). Holocene Coastal Evolution and Facies Model of the Bragança Macrotidal Flat  
944 on the Amazon Mangrove Coast, Northern Brazil. *Journal of Coastal Research*, (39),  
945 306–310.
- 946 Steyn, W. J., Wand, S. J. E., Holcroft, D. M., & Jacobs, G. (2002). Anthocyanins in  
947 vegetative tissues: a proposed unified function in photoprotection. *New Phytologist*,  
948 155(3), 349–361. doi:10.1046/j.1469-8137.2002.00482.x
- 949 Stuart, S. A., Choat, B., Martin, K. C., Holbrook, N. M., & Ball, M. C. (2006). The role of

- 950 freezing in setting the latitudinal limits of mangrove forests. *New Phytologist*, *173*(3),  
951 576–583. doi:10.1111/j.1469-8137.2006.01938.x
- 952 Takayama, K., Tateishi, Y., Murata, J., & Kajita, T. (2008). Gene flow and population  
953 subdivision in a pantropical plant with sea-drifted seeds *Hibiscus tiliaceus* and its allied  
954 species: Evidence from microsatellite analyses. *Molecular Ecology*, *17*(11), 2730–2742.  
955 doi:10.1111/j.1365-294X.2008.03799.x
- 956 Tohge, T., Nishiyama, Y., Hirai, M. Y., Yano, M., Nakajima, J. I., Awazuhara, M., ... Saito,  
957 K. (2005). Functional genomics by integrated analysis of metabolome and transcriptome  
958 of *Arabidopsis* plants over-expressing an MYB transcription factor. *Plant Journal*, *42*(2),  
959 218–235. doi:10.1111/j.1365-313X.2005.02371.x
- 960 Wang, D., Pan, Y., Zhao, X., Zhu, L., Fu, B., & Li, Z. (2011). Genome-wide temporal-spatial  
961 gene expression profiling of drought responsiveness in rice. *BMC Genomics*, *12*.  
962 doi:10.1186/1471-2164-12-149
- 963 Wang, S., Bai, G., Wang, S., Yang, L., Yang, F., & Wang, Y. (2016). Chloroplast RNA-  
964 Binding Protein RBD1 Promotes Chilling Tolerance through 23S rRNA Processing in  
965 *Arabidopsis*. *PLoS Genetics*, *12*(5), 1–21. doi:10.1371/journal.pgen.1006027
- 966 Wang, Z., Gerstein, M., & Snyder, M. (2009). RNA-Seq: a revolutionary tool for  
967 transcriptomics. *Nature Reviews. Genetics*, *10*(1), 57–63.
- 968 Wee, A. K. S., Mori, G. M., Lira-Medeiros, C. F., Núñez-Farfán, J., Takayama, K., Faulks,  
969 L., ... Kajita, T. (2018). The integration and application of genomic information in  
970 mangrove conservation. *Conservation Biology*, 1–40. doi:10.1111/cobi.13140
- 971 Wolf, J. B. W., Lindell, J., & Backstrom, N. (2010). Speciation genetics: current status and  
972 evolving approaches. *Philosophical Transactions of the Royal Society B: Biological  
973 Sciences*, *365*(1547), 1717–1733. doi:10.1098/rstb.2010.0023
- 974 Young, M. D., Wakefield, M. J., Smyth, G. K., & Oshlack, A. (2010). Gene ontology analysis  
975 for RNA-seq: accounting for selection bias. *Genome Biology*, *11*(2). doi:10.1186/gb-  
976 2010-11-2-r14
- 977 Zhang, A., Ren, H.-M., Tan, Y.-Q., Qi, G.-N., Yao, F.-Y., Wu, G.-L., ... Wang, Y.-F. (2016).  
978 S-Type Anion Channels SLAC1 and SLAH3 Function as Essential Negative Regulators  
979 of Inward K<sup>+</sup> Channels and Stomatal Opening in *Arabidopsis*. *The Plant Cell*, *28*(4),  
980 949–965. doi:10.1105/tpc.15.01050
- 981 Zhang, C., Zhang, L., Zhang, S., Zhu, S., Wu, P., Chen, Y., ... Wu, G. (2015). Global  
982 analysis of gene expression profiles in physic nut (*Jatropha curcas* L.) seedlings exposed  
983 to drought stress. *BMC Plant Biology*, *15*(1), 1–14. doi:10.1186/s12870-014-0397-x  
984

## 985 **Data accessibility**

986 Expression data and sequences that support the findings have been deposited in  
987 GenBank with the primary accession code GSE116060. A Variant Call Format file and its  
988 complementary file, both required for all of the genome-wide SNP diversity analyses are  
989 available in the supporting material. Other data are available upon request.

990 **Author contributions**

991 A.P.S., R.S.O., G.M.M. and M.V.C. designed the study. M.V.C. and G.M.M. conducted  
992 fieldwork. M.V.C. and C.S.M. cultivated seedlings and performed analyses of  
993 morphophysiological data. M.V.C. prepared samples and performed RNA-sequencing.  
994 M.V.C., M.D., D.H.O. and G.M.M. analysed RNA-Seq data. C.C.S. and M.V.C. verified  
995 RNA-Seq data through qRT-PCR. G.M.M. prepared samples and performed genotyping of  
996 genome-wide SNP. G.M.M. and M.V.C. analysed nextRAD results. A.P.S, M.I.Z., G.M.M.  
997 and R.S.O. contributed material/reagents/analysis tools. M.V.C. and G.M.M. wrote the  
998 manuscript. All authors discussed the results and contributed to the manuscript.

999

1000 **Figures and Tables**

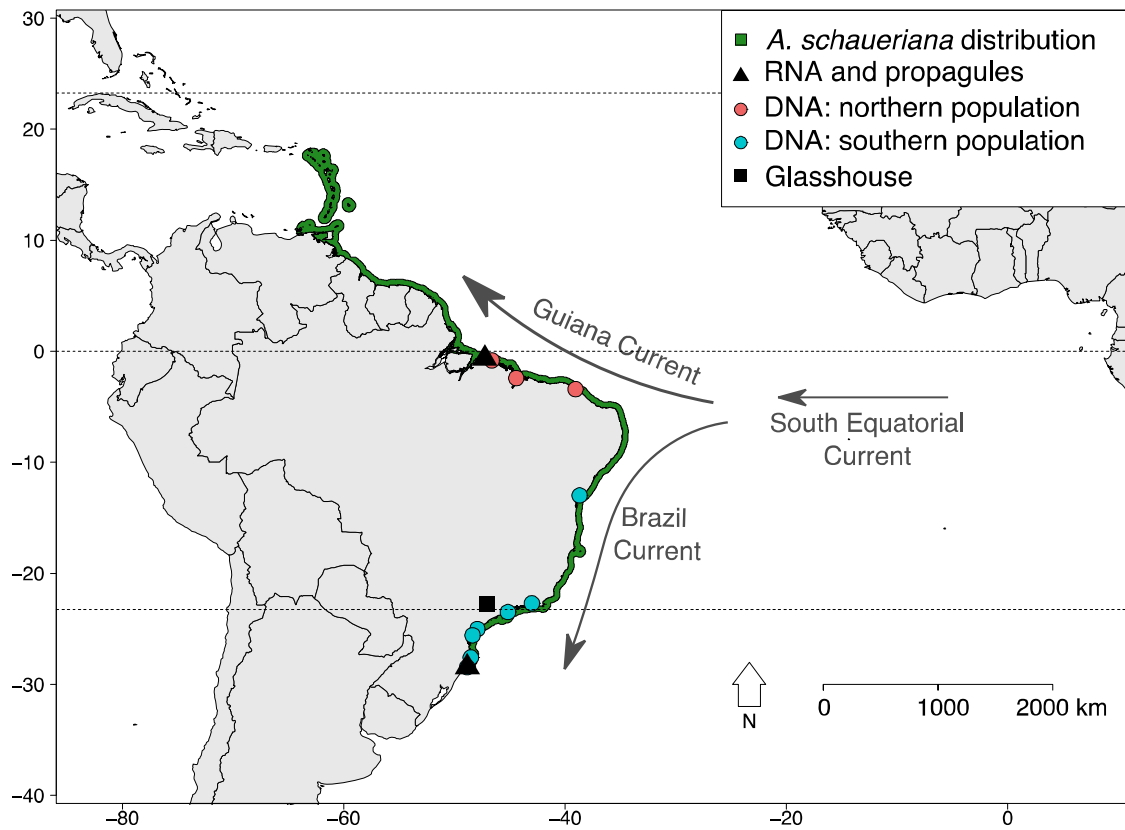

1001

1002 **Figure 1. Geographical locations of *Avicennia schaueriana* sampling sites.** Green-shaded  
1003 area represents the geographical distribution of the species. Black triangles represent the  
1004 locations of the Equatorial and Subtropical sampling sites for propagules and plant tissues  
1005 used in the common garden experiment and RNA-sequencing, respectively. Coloured dots  
1006 represent sampling sites of leaves used for the nextRAD genome-wide population diversity  
1007 analyses (red: population located north of the northeast extremity of South America  
1008 (NEESA); blue: population located south of the NEESA). Arrows approximately represent  
1009 the directions of the major sea currents along the Atlantic coast of South America.



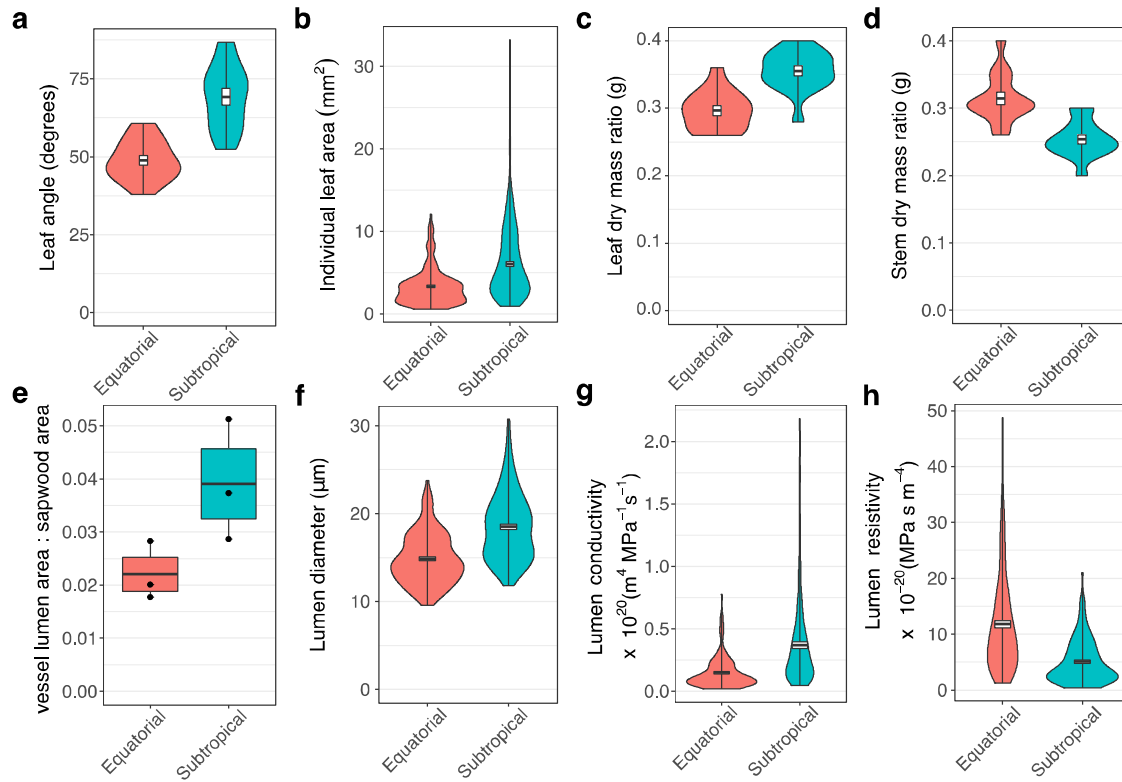

1010

1011 **Figure 2. Morphological divergence observed in seedlings of *Avicennia schaueriana***  
1012 **collected from Equatorial and Subtropical sampling sites and grown in a common**  
1013 **garden experiment.** Violin plots represent the distribution of observations for plants from  
1014 Equatorial (red) and Subtropical (blue) sampling sites. Box plots represent the mean, standard  
1015 error, and maximum and minimum values. Two group comparisons were performed using the  
1016 non-parametric unpaired Mann-Whitney Wilcoxon U-tests. For all variables represented in  
1017 the figure, the absence of a difference between groups was rejected at a significance threshold  
1018 of 0.05. (a) leaf inclination angle (n = 15 leaves per group, 5 plants per group); (b) individual  
1019 leaf area (n = 250 leaves per group, 3 plants per group); (c) leaf dry mass ratio (leaf dry  
1020 biomass/plant dry biomass) (n = 15 plants per group); (d) stem dry mass ratio (stem dry  
1021 biomass/plant dry biomass) (n = 15 plants per group); (e) vessel lumen area ratio in sapwood  
1022 (n = 175 per group, 3 plants per group, observations represented by black points); (f) vessel  
1023 lumen diameter (n = 700 vessels per group, 3 plants per group); (g) vessel lumen conductivity  
1024 (n = 700 vessels per group, 3 plants per group); (h) vessel lumen resistivity (n = 700 vessels  
1025 per group, 3 plants per group).  
1026

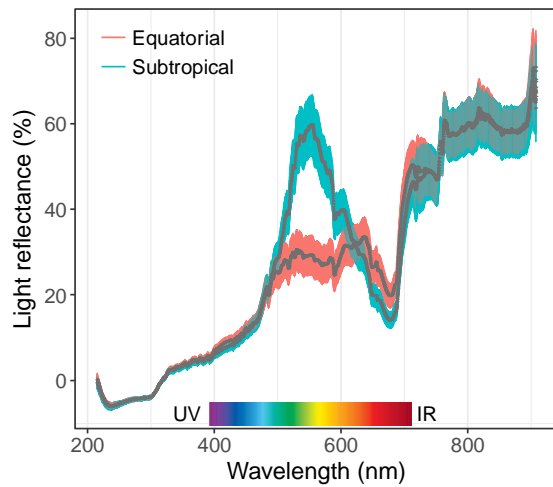

1027

1028 **Figure 3. Light reflectance of the stem epidermis of five-month-old *Avicennia***  
1029 ***schaueriana* seedlings grown in a common garden experiment.** Grey lines represent the  
1030 mean reflectance, and colour-shaded areas represent the standard error for each seedling  
1031 source site (red: Equatorial; blue: Subtropical, n = 10 plants per group). The visible light  
1032 spectrum range is highlighted in the figure.  
1033



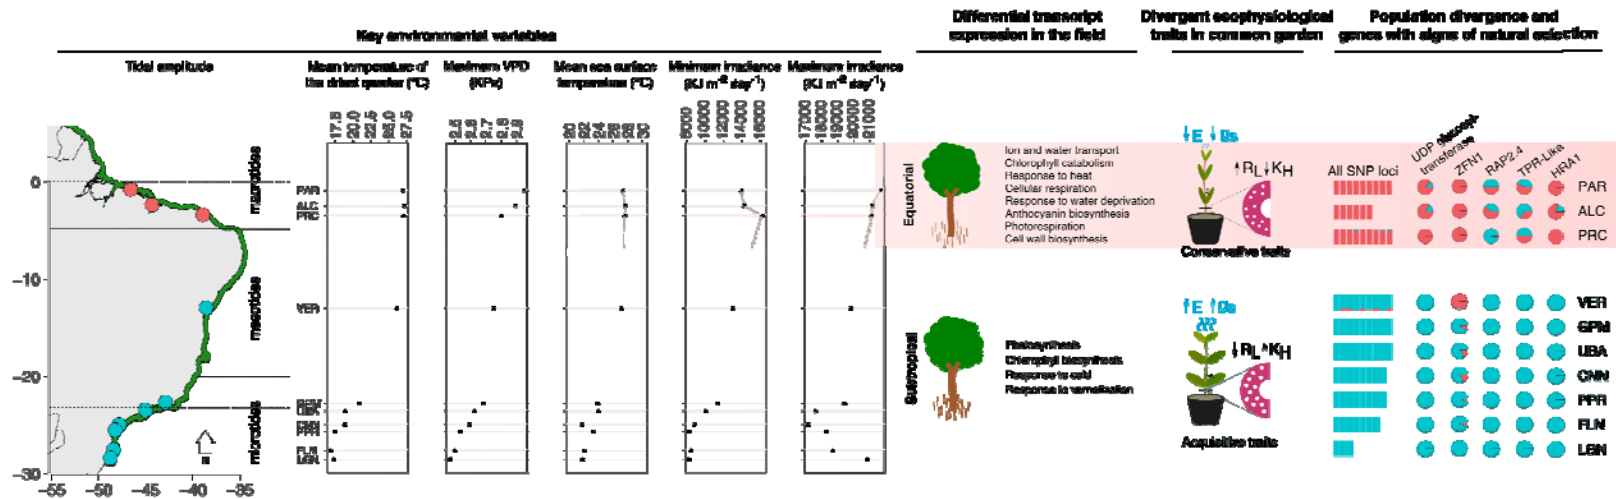

1034

1035 **Figure 4. Graphical summary of the integration of ecological and molecular approaches performed in this work.**

1036 Key oceanographic and climatic factors differ markedly between equatorial and subtropical latitudinal distribution extremes of the distribution of  
 1037 the neotropical mangrove tree, *Avicennia schaueriana*, and possibly shape the diversity of genotypes and phenotypes in the species. To address  
 1038 this issue, we examined the effects of the contrasting environments on overall gene expression, its morphophysiological effects in a common  
 1039 garden experiment and its genomic effects through natural selection detection tests based on single nucleotide polymorphism (SNP). Plants from  
 1040 equatorial and subtropical latitudes showed key divergences related to the use of water and to the acquisition of carbohydrates both in the field  
 1041 and in common garden conditions. In addition, north-south genetic divergence was observed in all genotyped SNPs. We also identified  
 1042 signatures of differential selective pressures on specific loci possibly related to the accumulation of anthocyanin (*UDP-GLUCOSYLTRANSFERASE*),  
 1043 the response to osmotic stress (*RAP2.4* and *ZFNI*), photosynthesis (*TPR*) and hypoxia (*HRAI*). The molecular and ecologic divergences  
 1044 observed through three independent approaches may be related to environmental factors that strongly differ between contrasting latitudes  
 1045 at which the species are found. These findings highlight the power of using multidisciplinary approaches for the study of adaptation in  
 1046 species for which little basic biological information is available, such as tropical trees. VPD: atmospheric vapour pressure deficit; E: transpiration  
 1047 rate;  $g_s$ : stomatal conductance;  $R_L$ : xylem vessel lumen resistivity;  $K_H$ : xylem vessel conductivity.

1048 **Table 1.** Characterisation of Subtropical and Equatorial sampling sites of propagules used in  
 1049 the common garden experiment and of RNA used for RNA-sequencing. SD: standard  
 1050 deviation of the mean.

|                                                                         | Subtropical                                                   | Equatorial                                                                                                                                                                           |
|-------------------------------------------------------------------------|---------------------------------------------------------------|--------------------------------------------------------------------------------------------------------------------------------------------------------------------------------------|
| Köppen-Geiger climate characterisation <sup>†</sup>                     | Temperate oceanic with hot summer, without a dry season (Cfa) | Tropical monsoon (Am)                                                                                                                                                                |
| Latitude (°)                                                            | 28 S                                                          | 0                                                                                                                                                                                    |
| Tidal amplitude                                                         | Microtidal (< 1 m)                                            | Macrotidal (> 4 m)                                                                                                                                                                   |
| Annual mean temperature (°C) <sup>‡</sup>                               | 20.09                                                         | 26.42                                                                                                                                                                                |
| Minimum temperature of the coldest month (°C) <sup>‡</sup>              | 11.76                                                         | 22.04                                                                                                                                                                                |
| Maximum temperature of the warmest month (°C) <sup>‡</sup>              | 28.66                                                         | 31.1                                                                                                                                                                                 |
| Annual precipitation (mm) <sup>‡</sup>                                  | 1,435                                                         | 2,216                                                                                                                                                                                |
| Precipitation in the driest month (mm) <sup>‡</sup>                     | 88                                                            | 4                                                                                                                                                                                    |
| Precipitation in the wettest month (mm) <sup>‡</sup>                    | 162                                                           | 452                                                                                                                                                                                  |
| Mean air VPD (KPa) <sup>‡</sup>                                         | 1.95                                                          | 2.82                                                                                                                                                                                 |
| Maximum air VPD (KPa) <sup>‡</sup>                                      | 2.47                                                          | 2.95                                                                                                                                                                                 |
| Minimum air VPD (KPa) <sup>‡</sup>                                      | 1.48                                                          | 2.71                                                                                                                                                                                 |
| Mean irradiance (KJ m <sup>-2</sup> day <sup>-1</sup> ) <sup>‡</sup>    | 14,270                                                        | 17,414                                                                                                                                                                               |
| Maximum irradiance (KJ m <sup>-2</sup> day <sup>-1</sup> ) <sup>‡</sup> | 20,802                                                        | 21,671                                                                                                                                                                               |
| Minimum irradiance (KJ m <sup>-2</sup> day <sup>-1</sup> ) <sup>‡</sup> | 8,201                                                         | 13,874                                                                                                                                                                               |
| Mean sea surface salinity (g/kg) <sup>§</sup>                           | 35.50                                                         | 34.96                                                                                                                                                                                |
| Sea surface salinity in the saltiest month (g/kg) <sup>§</sup>          | 36.24                                                         | 36.87                                                                                                                                                                                |
| Sea surface salinity in the freshest month (g/kg) <sup>§</sup>          | 33.73                                                         | 32.54                                                                                                                                                                                |
| Average day length (hours (± SD)) <sup>¶</sup>                          | 12.103 (±1.251)                                               | 12.115 (±0.033)                                                                                                                                                                      |
| True mangrove species in the area                                       | <i>Avicennia schaueriana</i><br><i>Laguncularia racemosa</i>  | <i>Avicennia germinans</i><br><i>Avicennia schaueriana</i><br><i>Laguncularia racemosa</i><br><i>Rhizophora mangle</i><br><i>Rhizophora racemosa</i><br><i>Rhizophora harriisoni</i> |

1051 VPD: Vapour pressure deficit. <sup>†</sup>According to Alvares et al. (Alvares, Stape, Sentelhas,  
1052 Gonçalves, & Sparovek, 2013). <sup>‡</sup>Source: BioClim (Hijmans, Cameron, Parra, Jones, & Jarvis,  
1053 2005). <sup>§</sup>Source: MARSPEC (Sbrocco & Barber, 2013). <sup>¶</sup>Source: 'daylength' function from R  
1054 package 'geosphere' (Forsythe, Rykiel, Stahl, Wu, & Schoolfield, 1995).
