1 **Full title**

2 Environment-driven genomic and trait divergence in a neotropical mangrove highlight  
3 differential sensitivities to climate change

4 **Short title**

5 Environment-driven genomic and trait divergence in a non-model species

6 **Authors**

7 Mariana Vargas Cruz<sup>1</sup>, Gustavo Maruyama Mori<sup>2</sup>, Caroline Signori Müller<sup>1</sup>, Carla Cristina da  
8 Silva<sup>1</sup>, Dong-Ha Oh<sup>3</sup>, Maheshi Dassanayake<sup>3</sup>, Maria Imaculada Zucchi<sup>4</sup>, Rafael Silva  
9 Oliveira<sup>1</sup> and Anete Pereira de Souza<sup>1\*</sup>.

10 **Affiliations**

11 <sup>1</sup> Department of Plant Biology, Institute of Biology, University of Campinas, Campinas, São  
12 Paulo, Brazil.

13 <sup>2</sup>Institute of Biosciences, São Paulo State University (Unesp), São Vicente, São Paulo, Brazil.

14 <sup>3</sup>Department of Biological Sciences, Louisiana State University, Louisiana, United States.

15 <sup>4</sup>São Paulo Agency for Agribusiness Technology, Piracicaba, São Paulo, Brazil.

16 \*Corresponding author. Email: [anete@unicamp.br](mailto:anete@unicamp.br)

17 **Abstract**

18 Integrating genomic and ecological data are instrumental for understanding the mechanisms  
19 of adaptive processes in natural ecosystems. In non-model species, such studies can be  
20 particularly challenging, but often brings to light results with implications for conservation.  
21 Here, we integrate molecular and ecophysiological approaches to assess the role of selection  
22 in the north-south organization of the genetic variation in the mangrove species *Avicennia*  
23 *schaueriana*, a new-world tree found from tropical to temperate coastal forests in the Atlantic  
24 coast of the Americas. In a common garden experiment, individuals from equatorial and  
25 subtropical forests diverged in traits involved in water balance and carbon acquisition,  
26 suggesting a genetic basis of the observed differences. RNA-sequencing highlighted the  
27 molecular effects of different light, temperature and air humidity in individuals under field  
28 conditions at contrasting latitudes. Additionally, genetic polymorphisms in trees sampled  
29 along most of the species range showed signatures of selection in sequences associated with  
30 the biogenesis of the photosynthetic apparatus, anthocyanin biosynthesis and osmotic and  
31 hypoxia stress responses. We found substantial divergences between populations occurring  
32 north and south of the north-eastern extremity of South America, underpinning roles of  
33 contrasting environmental forces in shaping the genetic structure of the species. The observed  
34 functional divergence might differentially affect sensitivities of populations to our changing  
35 climate, as discussed here. We indicate the necessity of independent conservation  
36 management for the long-term persistence of the species diversity. Moreover, we demonstrate  
37 the power of using a multidisciplinary approach in adaptation studies of non-model species.

## 38 **1. Introduction**

39           Adaptation to contrasting environments is an ubiquitous consequence of divergent  
40 selective forces acting on phenotypic diversity within species[1–3]. Phenotypic variation can  
41 be achieved through plasticity during acclimation to environmental changes, or ultimately  
42 through genetic variation shaped by adaptive processes[4]. Though the occurrence of  
43 intraspecific divergence in adaptive traits is well recognised, its molecular basis is not yet  
44 fully understood[5]. The integration of multiple independent approaches to understand the  
45 bases of adaptive trait variation is desirable to minimise the potential for incorrect  
46 conclusions[6].

47           In addition to its fundamental relevance in the field of evolutionary biology, research  
48 on the molecular mechanisms underlying adaptive variation has the potential to provide  
49 valuable information for ensuring species diversity persists under environmental challenges.  
50 Especially, accelerated rates of contemporary climate change call for studies on patterns of  
51 functional variation and its consequences for species responses to future climate  
52 conditions[7]. Climate change forecasts include a rise in sea-level from 0.26 to 0.82 m, an  
53 increase in mean atmospheric temperature from 0.3 to 4.8 °C and changes in precipitation  
54 regimes by the end of this century[8]. These changes are projected to especially affect certain  
55 ecosystems, as mangrove forests[9], since they are distributed in narrow intertidal  
56 environments in tropical and subtropical zones and are naturally limited by annual minimum  
57 temperatures and average rainfall[10]. Recent changes in sea level, in atmospheric  
58 temperature and in rainfall have already promoted shifts in the distribution of these  
59 ecosystems and in the density of individuals in forests[11–17]. Negative impacts are predicted  
60 mainly in regions in which aridity is expected to increase and where adjacent areas for  
61 population expansion are unavailable or do not exist[18]. However, in some regions,

62 mangroves are expected to persist through their ability to adjust soil elevation[11,19] and to  
63 rapidly shift their distribution to new suitable areas[11,18,20,21].

64 Yet, these predictions do not account for extant intraspecific variability across the  
65 geographical distribution of a given mangrove species. For instance, the genetic diversity of  
66 all mangrove species studied to date is structured into two populations occurring north and  
67 south of the northeast extremity of South America (NEESA)[22–24]. In the NEESA region, a  
68 bifurcating subdivision of the "South Equatorial Current" into the coastal "Guiana Current"  
69 and "Brazil Current" is observed, dispersing mangrove propagules in opposite directions and  
70 likely reducing the gene flow between populations[22,23,25] (Fig 1). Limited gene flow is a  
71 key process determining the magnitude of local adaptation and, when this condition is met,  
72 one may expect populations to adapt differently to their environments[2,26]. However, the  
73 neutral nature of the molecular markers used in previous works[22,23,25] precluded  
74 inferences on environment-driven genetic divergence.

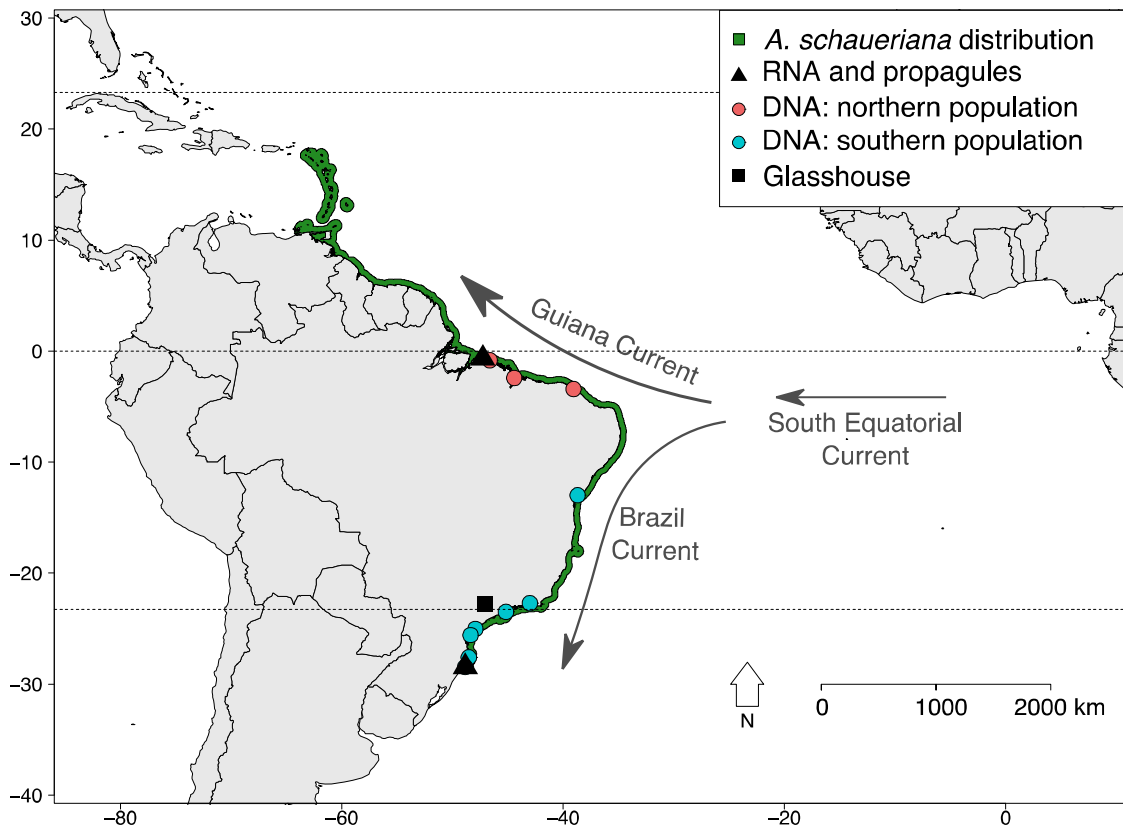

75

76 **Fig 1. Geographical location of *Avicennia schaueriana* sampling sites.** The green shaded area represents the  
77 geographical distribution of the species. Black triangles represent the location of the Equatorial and Subtropical  
78 sampling sites for propagules and plant tissues used in the common garden experiment and in RNA-sequencing,  
79 respectively. Coloured dots represent sampling sites of leaves used for extraction of genomic DNA for nextRAD  
80 sequencing (red: population located north of the northeast extremity of South America (NEESA); blue:  
81 population located south of the NEESA). Arrows approximately represent the direction of the major sea currents  
82 that act along the Atlantic coast of South America.  
83

84 Advances in DNA sequencing now permit the undertaking of genome-wide studies to  
85 identify neutral and putatively adaptive genetic variation even in non-model organisms, such  
86 as mangrove trees[27]. We used these tools in the present work to investigate the non-neutral  
87 divergence between previously identified populations of the new-world mangrove tree  
88 *Avicennia schaueriana* Stapf & Leechman ex Moldenke. We further explored the potential  
89 role of environmental forces underlying such divergence along the Atlantic coast of South  
90 America. *Avicennia schaueriana* is the most widely distributed mangrove species with  
91 genetic diversity information available over this geographic scale. The species is found in the

92 Lesser Antilles (~16 °N) and from Venezuela to the southernmost mangrove forests in the  
 93 Atlantic (~28 °S)[28]. To avoid incorrect conclusions about the targets of selection[6], we  
 94 integrated three independent but complementary molecular and ecological approaches: (1)  
 95 comparative physiology of contrasting Equatorial and Subtropical samples grown in a  
 96 common garden experiment; (2) comparative transcriptomics of trees from Equatorial and  
 97 Subtropical localities, sampled in their native environments (Table 1, S1 Fig) and (3) genome  
 98 scans for signatures of selection using high-throughput genome-wide genotyping of  
 99 individuals, sampled along almost the entire distribution of the species (Fig 1). We further  
 100 discuss the implications of our results in the face of predicted changes in climate as well as  
 101 potential strategies for mangrove conservation along the Atlantic coast of South America.

102

103 **Table 1.** Characterisation of Subtropical and Equatorial sampling sites of propagules used in the  
 104 common garden experiment and of RNA used for RNA-sequencing.

| Environmental features                                     | Subtropical                                                   | Equatorial            |
|------------------------------------------------------------|---------------------------------------------------------------|-----------------------|
| Köppen-Geiger climate characterisation <sup>†</sup>        | Temperate oceanic with hot summer, without a dry season (Cfa) | Tropical monsoon (Am) |
| Latitude                                                   | 28 S                                                          | 0                     |
| Tidal amplitude                                            | Microtidal (< 1 m)                                            | Macrotidal (> 4 m)    |
| Annual mean temperature (°C) <sup>‡</sup>                  | 20.09                                                         | 26.42                 |
| Minimum temperature of the coldest month (°C) <sup>‡</sup> | 11.76                                                         | 22.04                 |
| Maximum temperature of the warmest month (°C) <sup>‡</sup> | 28.66                                                         | 31.1                  |
| Annual precipitation (mm) <sup>‡</sup>                     | 1,435                                                         | 2,216                 |
| Precipitation in the driest month (mm) <sup>‡</sup>        | 88                                                            | 4                     |
| Precipitation in the wettest month (mm) <sup>‡</sup>       | 162                                                           | 452                   |
| Mean air VPD (KPa) <sup>‡</sup>                            | 1.95                                                          | 2.82                  |
| Maximum air VPD (KPa) <sup>‡</sup>                         | 2.47                                                          | 2.95                  |

|                                                                         |                                                              |                                                                                                                                                                                      |
|-------------------------------------------------------------------------|--------------------------------------------------------------|--------------------------------------------------------------------------------------------------------------------------------------------------------------------------------------|
| Minimum air VPD (KPa) <sup>‡</sup>                                      | 1.48                                                         | 2.71                                                                                                                                                                                 |
| Mean irradiance (KJ m <sup>-2</sup> day <sup>-1</sup> ) <sup>‡</sup>    | 14,270                                                       | 17,414                                                                                                                                                                               |
| Maximum irradiance (KJ m <sup>-2</sup> day <sup>-1</sup> ) <sup>‡</sup> | 20,802                                                       | 21,671                                                                                                                                                                               |
| Minimum irradiance (KJ m <sup>-2</sup> day <sup>-1</sup> ) <sup>‡</sup> | 8,201                                                        | 13,874                                                                                                                                                                               |
| Mean sea surface salinity (g/kg) <sup>§</sup>                           | 35.50                                                        | 34.96                                                                                                                                                                                |
| Sea surface salinity in the saltiest month (g/kg) <sup>§</sup>          | 36.24                                                        | 36.87                                                                                                                                                                                |
| Sea surface salinity in the freshest month (g/kg) <sup>§</sup>          | 33.73                                                        | 32.54                                                                                                                                                                                |
| Average day length (hours (± sd)) <sup>¶</sup>                          | 12.103 (±1.251)                                              | 12.115 (±0.033)                                                                                                                                                                      |
| True mangrove species at this area                                      | <i>Avicennia schaueriana</i><br><i>Laguncularia racemosa</i> | <i>Avicennia germinans</i><br><i>Avicennia schaueriana</i><br><i>Laguncularia racemosa</i><br><i>Rhizophora mangle</i><br><i>Rhizophora racemosa</i><br><i>Rhizophora harriisoni</i> |

105 VPD: Vapour pressure deficit. <sup>‡</sup>According to Alvares *et al.* [114]. <sup>¶</sup>Source: BioClim[31]. <sup>§</sup>Source:  
 106 MARSPEC[32]. <sup>¶</sup>Source: ‘daylength’ function from R package ‘geosphere’[115]. sd: standard  
 107 deviation of the mean.

## 108 **2. Results**

### 109 **2.1 Comparative physiology in a common garden experiment**

110 To identify functional divergence between individuals from Equatorial and  
 111 Subtropical sites, we conducted a common garden experiment in a glasshouse, under a  
 112 homogeneous, non-climate-controlled environment. We observed differences in key  
 113 morphophysiological traits between seedlings from contrasting latitudes grown in this  
 114 experiment (Fig 2 and 3). Subtropical plants showed higher transpiration rates and stomatal  
 115 conductance than Equatorial plants (S2 Fig). Additionally, plants from the two origins were  
 116 morphologically different from each other. The inclination angle of the leaf lamina was  
 117 steeper in Equatorial than Subtropical plants, and the average size of individual leaves was  
 118 smaller in Equatorial seedlings, even though the total leaf area and specific leaf area did not  
 119 significantly differ between the groups (Fig 2, S1 Table, S3 Fig, S1 Data). Subtropical plants

120 accumulated more biomass in all vegetative organs (leaves, stems and roots) in comparison to  
121 Equatorial plants under the experimental conditions. However, the biomass fraction allocated  
122 to stems in relation to other organs (stem dry mass ratio, SMR = stem dry biomass/plant dry  
123 biomass) was greater in Equatorial plants, whereas allocation to leaves (leaf dry mass ratio,  
124 LMR = leaf dry biomass/plant dry biomass) was greater in Subtropical plants. Biomass  
125 allocation to roots (root dry mass ratio, RMR = root dry biomass/plant dry biomass) did not  
126 differ between groups (S1 Table). Unexpectedly, 63% of the Equatorial plants flowered after  
127 the sixth month of growth (S3G Fig). Since this was not observed in any Subtropical plant,  
128 Equatorial plants with reproductive branches were not used in the biomass allocation analysis.

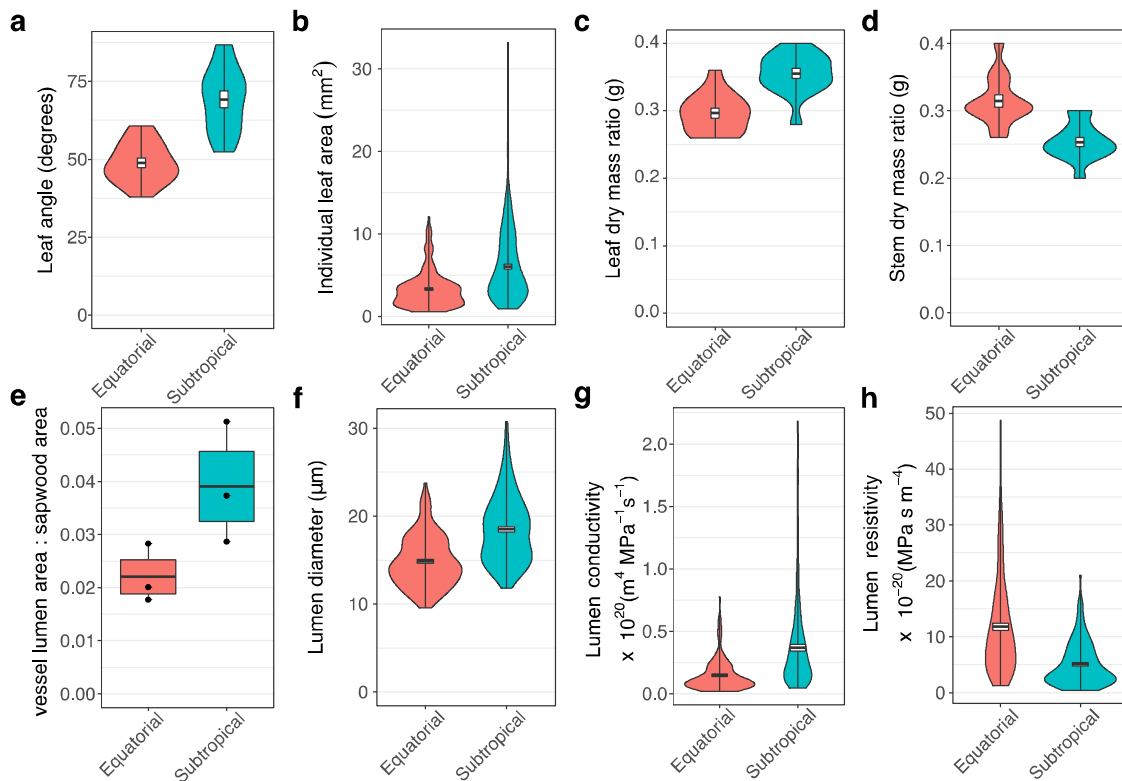

129

130 **Fig 2. Morphological divergence observed in seedlings of *Avicennia schaueriana* collected from**  
131 **an Equatorial and a Subtropical sampling sites and grown in a glasshouse conducted common**  
132 **garden experiment.** Violin plots represent the distribution of observations for plants from Equatorial  
133 (red) and Subtropical (blue) sampling sites. Box plots represent the mean, standard error, maximum  
134 and minimum values. Two group comparisons were performed using the non-parametric unpaired  
135 Mann-Whitney Wilcoxon U-tests. For all variables represented in the figure, the absence of a  
136 difference between groups was rejected at a significance threshold of 0.05. (A) Leaf inclination angle



137 (n = 15 leaves per group, 5 plants per group); (B) individual leaf area (n = 250 leaves per group, 3  
138 plants per group); (C) leaf dry mass ratio (Leaf dry biomass/Plant dry biomass) (n = 15 plants per  
139 group); (D) stem dry mass ratio (Stem dry biomass/Plant dry biomass) (n = 15 plants per group); (E)  
140 vessel lumen area ratio in sapwood (n = 175 per group, 3 plants per group, observations represented by  
141 black points); (F) vessel lumen diameter (n = 700 vessels per group, 3 plants per group); (G) vessel  
142 lumen conductivity (n = 700 vessels per group, 3 plants per group); (H) vessel lumen resistivity (n =  
143 700 vessels per group, 3 plants per group).

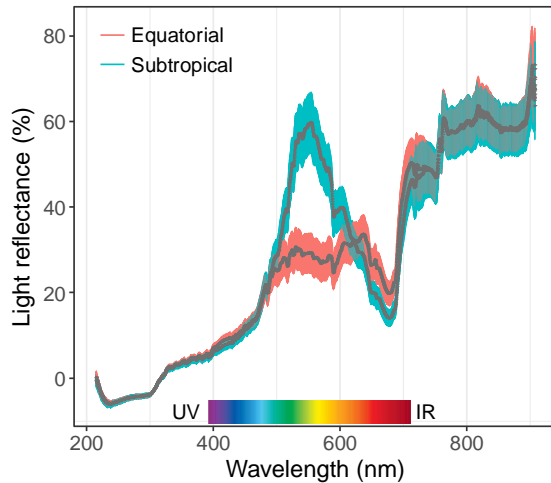

144

145 **Fig 3. Light reflectance of the stem epidermis of five-month-old *Avicennia schaueriana* seedlings**  
146 **grown in a common garden experiment.** Grey lines represent the mean reflectance and colour-  
147 shaded areas represent the standard error for each seedling source site (red: Equatorial; blue:  
148 Subtropical, n = 10 plants per group). The visible light spectrum range is highlighted in the figure.  
149

150           Stems from Subtropical samples showed wider vessel lumen diameter than those from  
151 Equatorial samples, but the vessel density was not significantly different between the groups  
152 (Fig 2, S3H-S3I Fig). The sapwood space dedicated to vessel lumen area was also greater in  
153 Subtropical than in Equatorial plants. Vessels of Subtropical plants, showed higher  
154 conductivity at a detriment of hydraulic safety, compared to Equatorial plants (Fig 2). The  
155 total conductivity of the stems was not significantly different between the sampling groups.  
156 Additionally, plants from these contrasting origins exhibited different pigmentation in the  
157 stem epidermis. Stems from Equatorial seedlings reflected more red light of long wavelengths  
158 (635-700 nm) and less green light of medium wavelengths (520-560 nm) than Subtropical  
159 seedlings (Fig 3, S2 Data).

160

## 161 2.2 Comparative transcriptomics using an RNA-sequencing experiment

162 In the absence of a reference genome, we used RNA-sequencing (RNA-Seq)[55] to  
163 obtain a *de novo* assembled transcriptome for *A. schaueriana* from leaves, stems and flowers  
164 of six adult individuals, from Equatorial and Subtropical sampling sites (S4 Fig). We obtained  
165 over 240 million raw, paired-end, 72 bp reads and over 209 million high quality reads after  
166 quality control (Fig 1, Table 2). High quality reads were assembled into 49,490 transcripts of  
167 the species, after the removal of misassembled, contaminant and redundant transcripts.  
168 Putative protein-coding sequences comprised 61% of the transcriptome (30,227 sequences).  
169 Over 91.9% of the high-quality reads were mapped to a single transcript, providing evidence  
170 of minimum redundancy and a wide representation of reads obtained via sequencing (S2  
171 Table). Moreover, searching for universal plant orthologous genes using the BUSCO  
172 pipeline[45] revealed that 91.8% of the conserved sequences in the plant database were  
173 present in the reference transcriptome (S2 Table). Assembled sequences with complete ORF  
174 represented approximately 42% (12,796) of all putative protein-coding transcripts, with an  
175 average length of 1,324 nucleotides (S3 Table, S5 Fig). The majority (94.33%) of these  
176 putative protein-coding sequences showed significant similarity to proteins in the Plant  
177 RefSeq[40] and TAIR databases. Only a minor fraction (2.85%) of the putative protein-  
178 coding transcripts could not be annotated using publicly available databases (S5C Fig). More  
179 than 80% of transcripts matched proteins from *Sesamum indicum* L. or *Erythranthe guttata*  
180 (Fisch. ex DC.) G.L. Nesom, which, together with *A. schaueriana* are grouped in the order  
181 Lamiales (S5D Fig). We identified putative orthologous genes between *A. schaueriana* and  
182 other closely related *Avicennia* L. (Avicenniaceae) species. This analysis revealed the  
183 presence of 27,658, 18,325 and 13,273 putative orthologues between the *A. schaueriana*

184 reference transcriptome and the transcriptomes derived, respectively, from *A. marina*[56]  
 185 leaves and *A. officinalis* leaves[57] and roots[58] (S4 Table).

186

187 **Table 2.** Characterisation of field conditions at the moment of plant material collection and storage in  
 188 RNA-stabilizing solution for subsequent sequencing.

| Sample ID | Sampling site (Climate <sup>†</sup> ) | GPS Point           | Date (d/m) | Time (h:m) | TL (m) | DL (h) | Temp (°C) <sup>‡</sup> | RH (%) <sup>‡</sup> | VPD (kPa) <sup>§</sup> | SI (KJ/m <sup>2</sup> ) <sup>‡</sup> |
|-----------|---------------------------------------|---------------------|------------|------------|--------|--------|------------------------|---------------------|------------------------|--------------------------------------|
| St1       | Subtropical (Cfa)                     | 28.48 S;<br>48.88 W | 23/08      | 15:15      | 0.5    | 11.3   | 19                     | 84                  | 0.351                  | 2033.89                              |
| St2       | Subtropical (Cfa)                     | 28.36 S;<br>48.80 W | 24/08      | 10:35      | 0.5    | 11.3   | 18.3                   | 86                  | 0.294                  | 1804.15                              |
| St4       | Subtropical (Cfa)                     | 28.48 S;<br>48.83 W | 25/08      | 13:11      | 0.5    | 11.3   | 20.9                   | 82                  | 0.445                  | 1863.14                              |
| Eq4       | Equatorial (Am)                       | 00.64 S;<br>47.26 W | 28/07      | 11:57      | 2.7    | 12.1   | 28.5                   | 49                  | 1.983                  | 1940.73                              |
| Eq5       | Equatorial (Am)                       | 00.65 S;<br>47.26 W | 29/07      | 12:22      | 2.7    | 12.1   | 28.3                   | 51                  | 1.883                  | 2724.54                              |
| Eq6       | Equatorial (Am)                       | 00.64 S;<br>47.26 W | 29/07      | 16:04      | 0.7    | 12.1   | 30.1                   | 47                  | 2.260                  | 1433.68                              |

189 TL: Tidal level; DL: day length; Temp: atmospheric air temperature; RH: atmospheric relative  
 190 humidity; VPD: air vapour pressure deficit; SI: solar irradiance.

191 <sup>†</sup>Köppen-Geiger Climate classification according to Alvares *et al.*[114].

192 <sup>‡</sup>Source: Brazilian National Institute of Meteorology (INMET).

193 <sup>§</sup>Estimated according to McRae[116].

194

195 To identify environmental forces associated with variations in gene expression  
 196 between source sites, we detected differentially expressed transcripts (DET) between samples  
 197 using the EdgeR[46]. Sampling was conducted at the end of winter at the Subtropical site and  
 198 at the beginning of the dry season at the Equatorial site (Table 2). Although plant material  
 199 was collected under uncontrolled field conditions, we observed a consistency in transcripts  
 200 expression levels from leaves and stems samples from plants from the same sampling site  
 201 (S6A-S6B Fig). Levels of transcript expression in flowers, however, did not present a  
 202 consistent pattern within sampling sites (S6C Fig), leading to the identification of only one

203 DET between flowers from Equatorial and Subtropical sites. Therefore, we did not include  
204 flowers in the subsequent analyses (S6F Fig). Conversely, we identified 1,837 and 904  
205 transcripts showing significantly different (FDR < 0.05) relative abundance, respectively in  
206 leaves and stems, between samples at the Equatorial and at the Subtropical sites (S6D-S6E  
207 Fig). Among the 2,741 DET, 1,150 (41.91%) were putative protein-coding transcripts.

208 The assignment of transcripts to Gene Ontology (GO) terms was possible for 25,184  
209 (83.31%) out of 30,227 putative protein-coding sequences in the transcriptome and enabled  
210 the performing of GO enrichment analyses of the DET. GO analyses were focused on  
211 biological processes potentially regulating the responses of *A. schaueriana* trees to the  
212 contrasting climatic variables in the equatorial and subtropical regions (Table 1, S1 Fig).  
213 Analyses were conducted separately for leaves and stems and for each of the two sets of DET,  
214 one showing increased expression levels in Equatorial than in Subtropical samples (we refer  
215 to these as DET-Eq) and the other set showing higher abundance in Subtropical compared to  
216 Equatorial samples (these are referred as DET-St). The enriched processes among the sets of  
217 DET included photosynthesis, plant responses to UV, to temperature stimulus, to water stress,  
218 to cell wall biosynthesis and to cellular respiration (S5-S9 Tables, S6I-S6-L Fig).

219

### 220 2.2.1 Photosynthesis

221 Among the DET-St, we observed the enrichment of categories related to  
222 photosynthesis, including various putative genes participating in the biosynthesis of the  
223 photosynthetic apparatus, in the biosynthesis of chlorophyll and photoreceptors, in the  
224 function of electron transporters and in the coordination of chloroplasts movement. In  
225 contrast, the DET-Eq set showed enrichment in transcripts similar to proteins required for

226 disassembling the light-harvesting complex of photosystem II in thylakoid membranes and for  
227 triggering chlorophyll degradation[59] (S6I-S6J Fig, S9 Table).

228

### 229 2.2.2 *Response to UV*

230 Both DET-St and DET-Eq sets showed enrichment in functions related to the response  
231 to UV-light, however, the sets of UV-responsive genes differed between these groups. The  
232 DET-St included UV-B protectants and genes involved in the biosynthesis of antioxidants  
233 induced by UV-B, such as plastid copper/zinc superoxide dismutases, photosystem II repair  
234 proteins, and transcripts involved in the synthesis of the antioxidant L-ascorbic acid (vitamin  
235 C). Conversely, the set of DET-Eq showed enrichment of putative genes involved in photo-  
236 oxidative damage reduction and in the positive regulation of anthocyanin biosynthesis in  
237 response to UV light. Antioxidants induced by UV irradiation[60], such as iron superoxide  
238 dismutases and transcripts involved in the biosynthesis of the pyridoxine (vitamin B6), were  
239 also among the DET-Eq (S9 Table 9).

240

### 241 2.2.3 *Response to temperature*

242 In the DET-St set, we observed putative genes presenting critical roles in chloroplast  
243 protein translation during cold acclimation and which provide tolerance to chilling  
244 temperatures[61,62]. For instance, transcripts similar to the *GLYCINE-RICH RNA-BINDING*  
245 *PROTEIN (RZIA)*, which has a chaperone activity during cold acclimation[63], and to the  
246 ATP-dependent *DNA HELICASE ATSGS1*, a cold-inducible protein required for DNA  
247 damage-repair[64]. Interestingly, we also identified in the DET-St set a putative *AGAMOUS-*  
248 *LIKE 24 (AGL24)* transcription factor, involved in floral transition induced by  
249 vernalisation[65]. Contrastingly, various transcripts similar to heat shock-inducible

250 chaperones and an *ADENINE NUCLEOTIDE ALPHA HYDROLASE-LIKE PROTEIN*  
251 (*AT3G53990*), involved in chaperone-mediated protein folding[66], were detected in the set  
252 of DET-Eq, potentially enhancing tolerance to heat in the Equatorial plants. Additionally, a  
253 transcript similar to the *ETHYLENE-RESPONSIVE ELEMENT BINDING PROTEIN*  
254 (*RAP2.3*), which confers resistance to heat and to hydrogen peroxide[67], was observed in  
255 this group (S9 Table).

256

#### 257 2.2.4 Response to water stress

258 Transcripts associated with the response to water deprivation, to cellular ion  
259 homeostasis and to osmotic adjustment were enriched in the DET-Eq. Dehydration-induced  
260 transcriptional regulators and genes that improve tolerance to water deficits were among these  
261 transcripts. For instance, a transcript similar to the *ETHYLENE-RESPONSIVE*  
262 *TRANSCRIPTION FACTOR (RAP2.4)*, induced by water stress and that regulates the  
263 expression of several drought-responsive genes, including aquaporins[68,69] was identified in  
264 the DET-Eq. Accordingly, a putative aquaporin *PLASMA MEMBRANE INTRINSIC*  
265 *PROTEIN (PIP1;4)*[70] was also in this set. We also observed in the DET-Eq, putative genes  
266 participating in the synthesis and accumulation of raffinose, an osmoprotective soluble  
267 trisaccharide[71], and also transcripts similar to osmosensitive ion channels belonging to the  
268 *EARLY-RESPONSIVE TO DEHYDRATION STRESS FAMILY PROTEIN*. In line with this,  
269 we observed among the DET-Eq an ion channel protein, *SLAC1 HOMOLOGUE 3 (SLAH3)*,  
270 required for stomatal closure induced by drought stress[72] and also the putative *NINE-CIS-*  
271 *EPOXYCAROTENOID DIOXYGENASE 3 (NCED3)*, which increases plant resistance to  
272 water deficit, through the accumulation of abscisic acid (ABA) leading to stomatal closure.  
273 Possibly as a consequence from decreased stomatal conductance, a transcript similar to the

274 *ALANINE-GLYOXYLATE AMINOTRANSFERASE 2 HOMOLOG 3 (AT3G08860)*, which  
275 plays a central role in photorespiration[73], showed higher expression in Equatorial than in  
276 Subtropical samples (S9 Table).

277

#### 278 *2.2.5 Cell wall biosynthesis*

279 Transcripts similar to 33 distinct proteins and transcription factors that play central  
280 roles in the biosynthesis and deposition of distinct cell wall components, such as cellulose,  
281 hemicellulose, lignin and pectin, were identified among the DET-Eq (S9 Table).

282

#### 283 *2.2.6 Cellular respiration*

284 The DET-Eq were also enriched in putative cellular respiration genes, which included  
285 one enzyme encoded in the nuclear genome, the *ACONITASE 3 (ACO3)*, which converts  
286 citrate to isocitrate in the tricarboxylic acid cycle (TCA cycle), and several other genes from  
287 the mitochondrial genome, encoding subunits of the NADH dehydrogenase, of the ATP-  
288 synthase and of the cytochrome C oxidase (S9 Table).

289 We verified and confirmed the results obtained in the computational analyses of RNA-  
290 Seq data by qRT-PCR of 10 DET detected across all leaf samples (S7 Fig, S10 Table, S1  
291 Result).

292

### 293 ***2.3 Detection of genetic variants with a signature of positive selection***

294 To complement the analyses of differential gene expression, which could result from  
295 both plasticity and adaptive selection[74], we searched for gene sequence variation in trees  
296 sampled along the Atlantic coast of South America (Fig 1, S11 Table). After quality filtering  
297 of sequenced data, we selected 77 individuals, which did not show signs of interspecific

298 hybridization with *Avicennia germinans*, for downstream analyses. These data were used in  
299 population genetics approaches to describe genetic structure and to perform genome-scans for  
300 loci with signatures of positive selection. We identified a set of 6,170 high-quality unlinked  
301 biallelic single nucleotide polymorphic loci (SNP) with a minor allele frequency  $\geq 0.05$  and  $\geq$   
302 8x coverage. The overall genetic structure corroborated a previous study based on putatively  
303 neutral microsatellite loci[22], dividing the sampling sites into two main groups: north and  
304 south of the NEESA (S8 Fig).

305 To investigate the role of non-neutral evolutionary forces driving the observed  
306 population divergence, we used two distinct methods that allowed the detection of loci that  
307 showed significant departures from a neutral expectation of interpopulation divergence. To  
308 minimise false-positive signatures of selection, we considered 122 loci that were  
309 conservatively detected by both pcadapt[54] and LOSITAN[75]. These loci were aligned to  
310 transcriptome characterised herein, enabling the screening for their potential functional roles.  
311 We found 16 candidate loci with putative evidence of selection within expressed sequences,  
312 15 of which showed similarity to gene models in *A. thaliana* and *S. indicum* (S12 Table).  
313 However, five of these reference proteins did not have informative function described for the  
314 model plant, hindering inferences about their putative function in *A. schaueriana*. Conversely,  
315 among the remaining ten annotated candidate loci, we found five genes involved in processes  
316 related to the contrasting climate regimes of equatorial and subtropical environments. One of  
317 the candidate SNP loci was detected in the putative transcription factor *ETHYLENE-*  
318 *RESPONSIVE TRANSCRIPTION ACTIVATOR (RAP2.4)*, which is induced in response to  
319 water and salt stress. This gene also regulates developmental processes mediated by light  
320 intensity[68] and the expression of aquaporins in *A. thaliana*[69], playing a role in plant water  
321 homeostasis. Two other candidate loci with putative signature of selection were associated



322 with transcription factors, the *ZINC-FINGER PROTEIN 1 (ZFN1)*, involved in the regulation  
323 of the expression of several water stress genes[76] and the *HYPOXIA RESPONSE*  
324 *ATTENUATOR (HRA1)*[77], which is strongly induced in *A. thaliana* in response to low  
325 oxygen levels. Additionally, the putative enzyme *UDP GLUCOSYL TRANSFERASE*, which  
326 catalyses the final step of anthocyanin biosynthesis, wherein pigmentation is produced[78],  
327 also showed a SNP variation with putative sign of positive selection. And one candidate locus  
328 was present in a transcript similar to the *AT2G20710* gene model in *A. thaliana*, a  
329 *TETRATRICOPEPTIDE REPEAT (TPR)* protein, which might play a role in the biogenesis of  
330 the photosynthetic apparatus[79].

331

#### 332 **2.4 Data availability statement**

333 All relevant morphophysiological data assessed from plants grown in the common  
334 garden experiment are available in the Supplementary information files (S1-S2 Data).  
335 Expression data and sequences that support the findings have been deposited in GenBank  
336 with the primary accession code GSE116060. Variant Call Format (VCF) file and its  
337 complementary file, both required for all genome-wide SNP diversity analyses are available  
338 in the Supplementary information files (respectively S3 Data and S4 Data).

### 339 **3. Discussion**

340 In the present work, we used complementary ecological and molecular approaches to  
341 unveil the nature of non-neutral phenotypic and genetic divergences as well as the role played  
342 by contrasting environmental forces between two populations of the mangrove species,  
343 *Avicennia schaueriana*. The overall genetic structure previously detected with a few  
344 microsatellite loci between populations occurring north and south of the northeast extremity

345 of South America (NEESA)[22] was confirmed here using thousands of genome-wide SNP  
346 loci (S8 Fig). Additionally, a common garden experiment revealed morphophysiological  
347 differences in traits that are key to the regulation of water and carbon balances between  
348 seedlings originated from the Equatorial and Subtropical sampling sites (Fig 2-3).  
349 Comparatively, the Equatorial plants showed morphophysiological and transcriptomic signals  
350 that appear to minimise effects of low water, high light and heat stresses, whereas traits  
351 observed in Subtropical plants suggest a maximisation of carbon assimilation, beneficial  
352 especially under low temperature and reduced light regime.

353 Traits exhibited by Equatorial plants compared to Subtropical plants in the common  
354 garden experiment, such as reduced leaf size, the steeper leaf angle, higher levels of red light-  
355 reflecting pigments, narrower vessels and lower rates of stomatal conductance, limit carbon  
356 acquisition[80] and may have imposed constraints to carbon gain in Equatorial plants, which  
357 also accumulated less biomass (Fig 2-3, S2-S3 Fig). Conversely, such characteristics allow  
358 plants to maintain leaf temperature at suitable levels for photosynthesis, while reducing both  
359 UV-exposure, through protective pigmentation and leaf inclination, and water loss, through  
360 minimisation of evaporative cooling[80,81]. We argue that the prevalence of these traits  
361 among Equatorial individuals may be advantageous in their natural environment, especially  
362 during the dry season (from August to December), when high light intensity is frequently  
363 combined with high temperature ( $> 30\text{ }^{\circ}\text{C}$ ) and average air humidity below 70% (Table 1, S1  
364 Fig). In the presence of high atmospheric evaporative demand and highly saline intertidal  
365 soils, water acquisition has an elevated energetic cost, representing a strong selective pressure  
366 in favour of water-saving adaptations[80]. Accordingly, Equatorial plants also showed lower  
367 transpiration rates than Subtropical plants in the common garden (S3 Fig). In addition, 63% of  
368 the Equatorial plants showed an early transition from vegetative to reproductive stage, starting

369 flowering after only sixth months of growth, in July and August (S3G Fig). The period in  
370 which flowering occurred is concordant with observations reported in literature for the species  
371 in tropical sites, from June-August [82], however we did not find records of six-months-old  
372 flowering plants. Even though in southern subtropical forests, a flowering peak is also  
373 observed in August[83], Subtropical plants did not flower during the experiment. Early  
374 flowering is a phenotype with complex genetic components, rarely studied, especially in non-  
375 model organisms, but is an important adaptive mechanism for maximizing the chances of  
376 reproduction under stress[84].

377         In contrast, Subtropical plants showed higher stomatal conductance and transpiration  
378 rates, higher levels of green light-reflecting pigments, larger leaf area, wider leaf lamina angle  
379 and larger xylem vessel diameter than Equatorial plants in the common garden experiment  
380 (Fig 2-3, S2-S3 Fig). These characteristics enhance light energy absorbance and carbon  
381 acquisition at the expense of greater water loss and higher cavitation risk[85,86]. These traits  
382 may also compensate for declines in net primary production in higher-latitude  
383 environments[87], resulting from compressed environmental windows of opportunity, mainly  
384 in terms of temperature and solar irradiance (Table 1, S1 Fig). We argue that the intensity of  
385 cold events in southern Subtropical populations of *A. schaueriana* is likely not sufficiently  
386 expressive to favour the selection of freezing-tolerant individuals, in contrast to results  
387 reported for the congeneric *A. germinans* at its northernmost distribution limit, on the Atlantic  
388 coast of North America[14]. At the southern range edge of *A. schaueriana*, the annual  
389 minimum air temperature does not drop below 0 °C (Table 1, S1 Fig), thus being higher than  
390 the expected mangrove physiological threshold[10]. Additionally, the relatively small  
391 population size of *A. schaueriana* at this location[28] and the arrival of maladapted

392 propagules from northerly populations might reduce the potential strength of natural selection  
393 in favour of cold-adapted individuals at this Subtropical site.

394 Functional interpopulation divergence was also evident under field conditions at the  
395 molecular level. Comparative transcriptomics of trees sampled in field conditions corroborate  
396 with the suggested effects of the environmental variation in light availability, temperature and  
397 water stress on the phenotypic divergence observed in the common garden experiment.  
398 Transcriptomic profiles were obtained at the beginning of the dry season in the Equatorial  
399 sampling site and at the end of winter in the Subtropical sampling site (Table 2) and showed  
400 an enrichment of DET involved in photosynthesis, cellular respiration, cell wall biosynthesis  
401 and plant responses to water stress, temperature stimulus and UV light (S6I-S6L Fig).  
402 Additionally, the adaptive relevance of these biological processes in the field was highlighted  
403 through the identification and functional annotation of SNP loci putatively under natural  
404 selection from populations along the *A. schaueriana* geographic distribution (S12 Table). In  
405 the following subsections, we integrate information derived from these different methods.

406

### 407 **3.1 Water stress as a relevant selective pressure in equatorial populations**

408 The increased levels of transcripts similar to heat-shock proteins, drought-induced ion  
409 transporters, genes that enhance tolerance to heat, that are involved in stomatal closure and  
410 that play central roles in photorespiration, provided multiple lines of evidence of water stress  
411 in Equatorial samples. Additionally, compared to Subtropical plants, Equatorial plants  
412 exhibited higher basal levels of expression of aquaporins and genes involved in the  
413 accumulation of organic solutes. These investments improve tolerance to drought[71] by  
414 lowering the cell water potential and rather actively transporting water through proteins in the  
415 cell membrane than using passive apoplastic water transport[80,88,89]. The enhanced rigidity

416 of cells reduces the risk of cell damage during the dehydration and rehydration process and,  
417 thus, improves resistance to the high extra-cellular osmotic pressure[90]. Therefore, we argue  
418 that the higher expression of several transcripts similar to key secondary cell wall  
419 biosynthesis and cell wall thickening genes in Equatorial samples also suggests plant  
420 responses to water stress. Corroborating evidences of the relevance of water stress in the  
421 Equatorial environmental conditions, we identified gene sequence divergence between  
422 populations north and south of the NEESA in two putative osmotic stress-responsive  
423 regulatory transcription factors (*RAP2.4* and *ZFNI*), one of which also induces the expression  
424 of aquaporins (*RAP2.4*). These findings are additionally supported by the divergence in traits  
425 related to water balance between plants from Equatorial and Subtropical sampling sites, such  
426 as leaf size, vessel diameter, leaf angle and transpiration and stomatal conductance rates (Fig  
427 2, S2 Fig).

428

### 429 **3.2 *Latitudinal variation in light quality and intensity may shape non-neutral diversity***

430 Contrasting seasonal fluctuations in the photoperiod and in the light quality  
431 throughout the year between low and high latitudes[91] (Table 1) likely influence the  
432 differential expression of putative UV-inducible antioxidant and photodamage repair genes.  
433 The adaptive relevance of this is supported by the natural selection sign found in a transcript  
434 similar to a key gene to the biosynthesis of anthocyanin, which confers protection to UV-B  
435 irradiation (*UDP-GLUCOSYL TRANSFERASE*). Divergent morphological traits between  
436 Equatorial and Subtropical plants grown in the common garden experiment, including leaf  
437 inclination angle and stem light reflectance, corroborate with the observed differential gene  
438 expression and genomic signatures for positive selection (Fig 2 and 3).

439

440 **3.3 Low water and low light availability may affect photosynthesis and cellular**  
441 **respiration**

442 In response to abiotic stress conditions such as drought, heat and high light, plants  
443 optimise the use of light energy and minimise photooxidative damage, reducing the  
444 photosynthetic activity by repressing light-harvesting and photosystem-component genes[92–  
445 100]. We argue that the lower expression of photosynthesis genes in Equatorial than in  
446 Subtropical samples likely reinforces the relevance of water stress in shaping divergent  
447 phenotypes in the field, but also may result in an enhanced absorption of light energy in  
448 Subtropical plants. Accordingly, we identified an increased expression of transcripts  
449 associated with chlorophyll biosynthesis in the DET-St set and with chlorophyll breakdown  
450 and leaf senescence in the DET-Eq set. The degradation of chlorophyll followed by leaf  
451 senescence allows the remobilisation of nutrients and reduces the water loss through leaf  
452 transpiration, contributing to water balance and to drought tolerance[101]. In addition, we  
453 detected a putative genetic signature of selection in a transcript similar to a *TPR* protein,  
454 required for chlorophyll synthesis and for the biogenesis of the photosynthetic apparatus[79].  
455 Thus, we suggest that differential seasonality in light and water availability at subtropical and  
456 equatorial latitudes may be involved in the divergence of non-neutral variability in the  
457 species. Corroborating with the genomic approaches, we observed divergence of functional  
458 traits related to water use and to the absorbance of light energy in plants from contrasting  
459 latitudes cultivated under the same environmental conditions (Fig 2-3, S2-S3 Fig).

460 The mitochondrial activity is deeply connected to the photosynthesis and to  
461 chloroplasts function since it generates ATP for carbohydrate synthesis, plays a role in the  
462 protection of chloroplasts against photoinhibition, participates in the dissipation of reducing  
463 equivalents and exchanges metabolites with chloroplasts during photorespiration[102,103].

464 Cellular respiration also provides ATP and carbon compounds for secondary metabolism,  
465 playing a fundamental role in responses to abiotic stresses, including drought[102,104]. We  
466 suggest that the higher levels of cellular respiration genes in Equatorial than in Subtropical  
467 samples, may be a consequence of the reduced expression of photosynthesis genes and  
468 enhanced energetic demand caused by water stress.

469

### 470 ***3.4 Tidal amplitude variation with latitude may act as a diverging force along the*** 471 ***Atlantic coast of South America***

472 Tidal amplitude is markedly reduced with increasing latitude along the Atlantic coast  
473 of South America, ranging from greater than 4 m at low latitudes to less than 1 m at high  
474 latitudes[105]. The wide variation in tidal amplitude exposes trees to contrasting durations of  
475 hypoxia. The identification of a candidate SNP locus with putative sign of positive selection  
476 in a transcription factor induced by oxygen deprivation (*HRAI*) may indicate that differential  
477 tidal variation act as a diverging selective force between northerly Equatorial and southerly  
478 Subtropical populations of *A. schaueriana*. The *HRAI* putative homolog also showed a 1.75-  
479 fold higher expression in Subtropical leaves relative to Equatorial leaves under field  
480 conditions. However, we did not detect evidences at the phenotypic level in the common  
481 garden experiment corroborating with the suggested relevance of this environmental variable.

482

### 483 ***3.5 Climate change and conservation implications of the results***

484 The functional divergence observed in this work might differentially affect the  
485 sensitivity of populations of *A. schaueriana* to a rapidly changing climate. Although there is  
486 no evidence of mangrove expansion at its southernmost range limit on the Atlantic coast of  
487 South America[28], researchers suggest that populations could expand polewards in the near

488 future, benefitting from the increased air and ocean temperatures and greenhouse gas  
489 concentrations[106]. We expect that the more acquisitive phenotypic traits exhibited in the  
490 common garden experiment by *A. schaueriana* seedlings from the subtropical range edge may  
491 indeed be favourable for growth under increased temperatures and rainfall[8]. However, due  
492 to the low tidal variation (< 1 m) observed in the southernmost mangrove distribution edge in  
493 the Atlantic coast of South America, a greater relocation of forests is required for trees to  
494 keep pace with the rising sea-level[107]. In this context, dense human coastal occupations  
495 combined with the narrow intertidal zones, characteristic of this region, make mangroves at  
496 higher latitudes more vulnerable to habitat loss than in the equatorial region of the Atlantic  
497 coast of South America. Conversely, despite having wider coastal plains potentially available  
498 for expansion, we expect that populations of *A. schaueriana* occurring north of the NEESA  
499 will be threatened by the increased mean temperatures and the decreased precipitation during  
500 the El-Niño Southern Oscillation events[8]. The critical temperature threshold is likely to be  
501 reached more frequently, intensifying drought events in this region, possibly reducing carbon  
502 assimilation and productivity[108] and, in extreme cases, causing biomass loss triggered by  
503 cavitation or carbon starvation[109,110]. For the definition of short-term mangrove  
504 conservation plans, such as reforestation or restoration of degraded areas on the Atlantic coast  
505 of South America, we recommend that populations occurring north and south of the NEESA  
506 should warrant attention as distinct conservation management units[111].

507

### 508 **3.6 Concluding remarks**

509 Based on the combined analysis of our results, we argue that carbon acquisition in the  
510 equatorial region may be limited by the combination of a longer exposure to hypoxia, a higher  
511 vapour pressure deficit (VPD) and a higher solar irradiance, especially during the hot and dry



512 season, whereas in the subtropical region, limitations in carbon gain may result from lower  
513 solar irradiance levels, lower temperature and shorter photoperiod during winter (Fig 4).  
514 These environmental differences between equatorial and subtropical latitudes seem to be  
515 shaping gene expression in the field, and remarkably, may have shaped both allele  
516 frequencies in genes responding to these variables and morphophysiological traits observed in  
517 individuals of *A. schaueriana* (Fig 4). The emergence of this adaptive divergence is facilitated  
518 by the limited gene flow identified between populations north and south of the NEESA,  
519 possibly driven by the movement of the major ocean currents that are active on the Atlantic  
520 coast of South America (Fig 1). Because a similar north-south divergence of neutral  
521 molecular markers is also observed for other mangrove and mangrove-associated species on  
522 the Atlantic coast of South America[22,23,25], it is also plausible that the environmental  
523 drivers of divergence in *A. schaueriana* play a role in the divergence of other species. In  
524 addition to revealing that these populations are genetically and functionally distinct  
525 units[112], we provide an in-depth empirical evaluation of the intraspecific variation of a  
526 long-living non-model tree. We foresee that these results should allow a clearer prediction of  
527 how *A. schaueriana* and potentially other mangrove species may respond to the current global  
528 climate changes by accounting for phenotypically[7] and genetically[113] informed mangrove  
529 distribution modelling.  
530

531

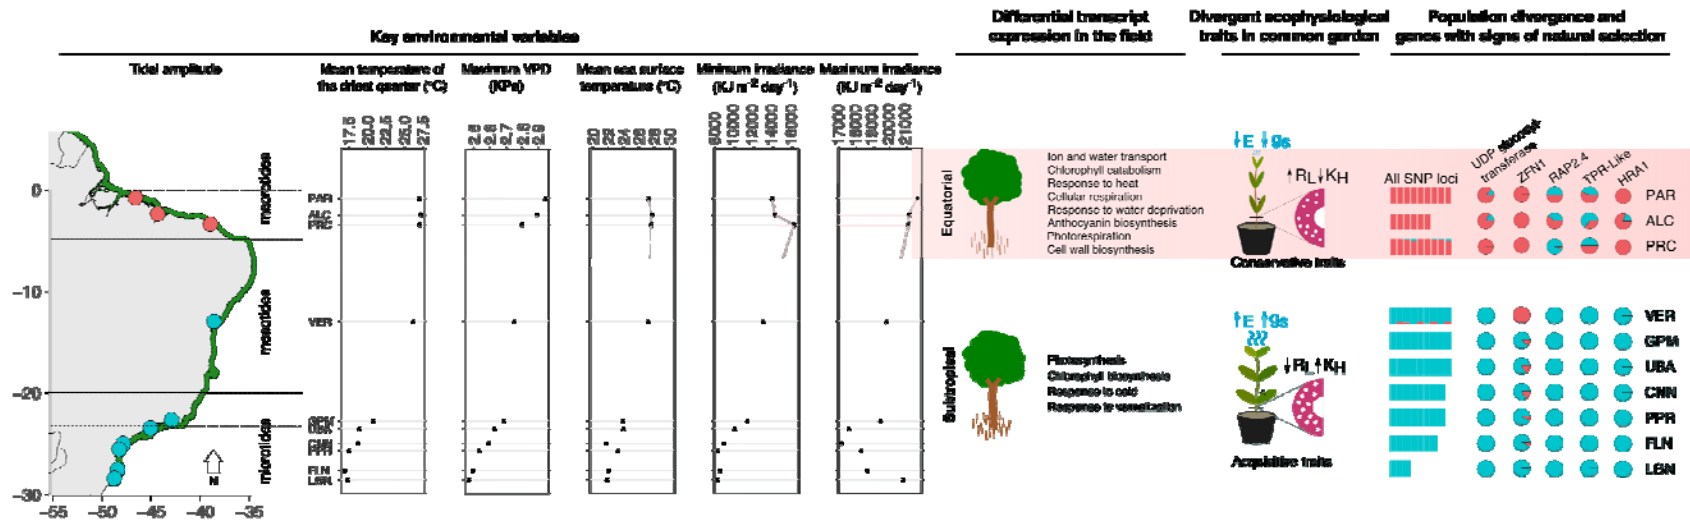

532

533 **Fig 4. Graphical summary of the integration of ecological and high-throughput genomics data performed in this work.**

534 Key oceanographic and climatic factors differ markedly between equatorial and subtropical latitudinal distribution extremes of the distribution of the

535 neotropical mangrove tree, *Avicennia schaueriana*, possibly shaping the diversity of genotypes and phenotypes of the species. To address this issue,

536 we examined the effects of these contrasting environments on the overall gene expression, its morphophysiological effects in a common garden experiment

537 and its genomic effects through natural selection detection tests based on single nucleotide polymorphic (SNP) loci. Plants from equatorial and

538 subtropical latitudes showed key divergences related to the use of water and to the acquisition of carbohydrates both in the field and in common garden

539 conditions. In addition, a north-south genetic divergence was observed in all genotyped SNP loci. We also identified signatures of differential selective

540 pressures on specific loci possibly related to the accumulation of anthocyanin (*UDP-GLUCOSYLTRANSFERASE*), in response to osmotic stress

541 (*RAP2.4* and *ZFN1*), photosynthesis (*TPR*) and hypoxia (*HRA1*). The molecular and ecologic divergences observed through three independent

542 approaches may relate to the environmental factors that strongly differ between contrasting latitudes in which the species are found. These findings

543 highlight the power of using multidisciplinary approaches to the study of adaptation in species with little basic biological information such as tropical

544 trees. VPD: Atmospheric vapour pressure deficit; E: transpiration rate; g<sub>s</sub>: stomatal conductance; R<sub>l</sub>: xylem vessel lumen resistivity; K<sub>H</sub>: xylem vessel

545 conductivity.

546

## 547 **4. Materials and Methods**

### 548 **4.1 Propagules sampling sites**

549 Ten mature propagules were collected from ten *A. schaueriana* mother trees belonging  
550 to each of two genetically divergent natural populations described in a previous work[22]: one  
551 north and one south of the NEESA (Fig 1). Trees were at least 100 m apart from each other at  
552 each of the two contrasting sampling points: (1) the southernmost limit of the distribution of  
553 American mangroves, in the subtropical region, and (2) one equatorial site in one of the  
554 largest macrotidal mangrove forests in the world[29,30], closer to the northernmost limit of  
555 the species range (Fig 1). We refer to the former as the ‘Subtropical site’ and to the latter as  
556 the ‘Equatorial site’ throughout this work. A characterization of each of these sites can be  
557 found in Table 1. Further details about these areas can be found in the Supplementary  
558 Information file (S1 Method, S1 Fig).

559 To better characterise the climate from the Equatorial and Subtropical sampling sites  
560 we have downloaded temperature, relative humidity, rainfall and solar irradiance datasets  
561 (2008-2017) from the INMET database (the Meteorological Institute of Brazil) (S1 Fig) and  
562 the environmental data from BioClim[31] and MARSPEC[32].

563

### 564 **4.2 Seedlings germination and growth in a common garden experiment**

565 Propagules of *A. schaueriana* sampled from the Equatorial and Subtropical sites  
566 germinated on germination trays filled with mangrove soil, under shaded conditions, in open  
567 air being irrigated daily with 1:10 (v:v) sea water:tap water solution[33]. After two months,  
568 44 similar-sized seedlings from each sampling site — with an average height of 18 cm, most

569 with three leaf pairs and senesced cotyledons — were transplanted to 6 L pots filled with a  
570 mixture of topsoil and sand (1:1 ratio). Seedlings were cultivated for seven months under the  
571 same environmental conditions in a glasshouse at the University of Campinas, São Paulo,  
572 Brazil (22°49' S 47°04' W). Automatic sensors coupled with a data logger (Onset Computer  
573 Corp., Bourne, MA, USA) measured the atmospheric humidity and temperature inside the  
574 glasshouse every 15 minutes. Seedlings were irrigated by an automated system twice per day  
575 (10 a.m. and 5 p.m.), with a 3-minute fresh water spray. Twice a week nutrients were  
576 manually added to the soil using 600 mL of 0.4X Hoagland solution with 15.0 g L<sup>-1</sup> NaCl per  
577 pot. All pots were rotated to reduce the effects of eventual environmental heterogeneity. The  
578 monitored environmental conditions in the glasshouse differed markedly from both sites of  
579 origin (S9 Fig 9). Thus, none of the individuals benefitted from environmental conditions that  
580 corresponded to their original sampling site.

581

### 582 **4.3 Comparative ecophysiology in a common garden experiment**

583 The light reflectance of stems was measured in 10 plants from each sampling site  
584 using a USB4000 spectrophotometer (OceanOptics, Inc., Dunedin, FL, USA) coupled to a  
585 deuterium-halogen light source (DH-2000; OceanOptics, Inc., Ostfildern, Germany), using a  
586 light emission range from 200-900 nm. To generate a daily curve of photosynthesis, stomatal  
587 conductance and transpiration rates, five six-month-old individuals from each sampling site  
588 were used for measurements every two or two and a half hours, in two different days, using a  
589 Li-Cor 6400 XT (Li-Cor Corp., Lincoln, NE, USA).

590 After harvest, plants that did not present flowers or flower buds were split into three  
591 parts: leaves, stems and roots. All plant parts were washed with distilled water, dried for 7  
592 days at 70 °C and weighted. A quantitative analysis of key morphological traits was

593 performed using three plants from each site. The individual leaf area, total leaf area and leaf  
594 lamina angle were measured per plant through photographs analyses using the ImageJ  
595 software[34]. The specific leaf area (SLA,  $\text{cm}^2$  leaf area  $\text{kg}^{-1}$  leaf dry biomass) was also  
596 calculated for these same samples. Stems chunks were fixed in FAA (Formaldehyde Alcohol  
597 Acetic acid) and stored in 70% alcohol for use in a wood anatomy analysis. Stems were cut  
598 into transverse sections with a thickness of 30  $\mu\text{m}$ . Sections were stained with a mixture of  
599 1% Astra Blue and 50% alcohol (1:1) followed by 1% Safranin O (diluted in distilled water).  
600 Micrographs of the slides were taken using an Olympus BX51 microscope coupled to an  
601 Olympus DP71 camera (Olympus Corp., Tokyo, Japan). The following wood traits were  
602 quantified using ImageJ[34] and R 4.0: vessel lumen area (A), vessel density in the xylem  
603 (number of vessels/xylem area), proportion of solitary vessels (number of solitary  
604 vessels/total number of vessels), vessel grouping index (mean number of vessels/vessel  
605 grouping), proportion of vessel lumen area in xylem (vessel lumen area/xylem area) and  
606 vessel lumen area in sapwood (vessel lumen area/sapwood area). The vessel arithmetic  
607 diameter (D), vessel hydraulic conductivity ( $K_H$ ) and lumen resistivity ( $R_L$ ) were estimated  
608 according to Scholz *et al.*[35].

609 Statistical analyses were performed in R 4.0, with a significance level of 5%, and two-  
610 group comparisons were made using the Mann-Whitney-Wilcoxon unpaired test for non-  
611 parametric distributions and Student's T-test for parametric distributions. Multiple-group  
612 comparisons were conducted using one-way analysis of variance (ANOVA) with post hoc  
613 Tukey honest significant difference (HSD) tests.

614

#### 615 **4.4 Collection of plant material for RNA extraction and RNA-sequencing**

616 Plant material for RNA-Seq was collected in the “Propagules sampling sites”  
617 subsection. Three adult trees were sampled in each sampling site from July-August of 2014,  
618 at the end of winter in the Subtropical sampling site and at the beginning of the dry season in  
619 the Equatorial sampling site (Table 2, S6 Fig). At each site, we sampled leaves, stems and  
620 flowers of trees located at least 100 m apart from each other, from 11:00 am to 4:00 pm,  
621 during the low tide, at different altitudes in the intertidal zone (Table 2). Plant material was  
622 washed with sodium hypochlorite solution (0.2%), cut with a sterile slide and immediately  
623 stored in RNeasy (Qiagen Inc., Austin, TX, USA).

624 Total RNA extraction was performed using a protocol developed by Oliveira et  
625 al.[36]. RNA integrity and purity were verified by agarose gel electrophoresis and using a  
626 NanoVue spectrophotometer (GE Healthcare Life Sciences, Chalfont, Buckinghamshire, UK).  
627 Illumina TruSeq RNA Sample Preparation protocol kits (Illumina Inc., San Diego, CA, USA)  
628 were used to construct enriched complementary DNA (cDNA) libraries. The quality of all  
629 libraries was assessed using the Agilent DNA 1000 chip and Agilent 2100 Bioanalyzer  
630 (Agilent Technologies, Santa Clara, USA). cDNA libraries concentrations were quantified by  
631 qPCR using the Sequencing Library qPCR Quantification kit (Illumina Inc.), followed by  
632 sequencing using TruSeq SBS Paired End kits (Illumina Inc.) and a Genome Analyzer IIX  
633 sequencer (Illumina Inc.).

634

#### 635 ***4.5 Assembly and characterization of the first reference transcriptome of A.*** 636 ***schaueriana***

637 Adapter sequences were trimmed and 72 bp paired end reads were filtered by quality  
638 (phred score  $\geq 20$  for at least 70% of read length) using the NGS QC Toolkit 2.3[37]. High-  
639 quality reads were used in the subsequent transcriptome assembly in the CLC Genomics

640 Workbench (<https://www.qiagenbioinformatics.com/>). We used the default settings and only  
641 set the distance between read pairs (300-500 bp), and the k-mer size to 45 bp.

642 Reads were mapped to the assembled transcripts using bowtie 1[38] in the single-read  
643 mode using default parameters. We then removed transcripts that did not present read-  
644 mapping support. Functional annotation was performed using the blastx algorithm, available  
645 in blast+ v. 2.2.31[39], with an e-value threshold of  $1^{-10}$ . The NCBI RefSeq[40], The  
646 Arabidopsis Information Resource (TAIR)[41] and the NCBI non-redundant (nr) databases  
647 were used as references. To remove contaminant transcripts, we excluded all transcripts that  
648 were exclusively similar to non-plant sequences. Protein family domains were identified  
649 using HMMER3[42], which iteratively searched all assembled sequences against the Pfam  
650 database. To assign Gene Ontology (GO) terms to transcripts we used the *Arabidopsis*  
651 *thaliana* gene association file from the Gene Ontology Consortium[43] and retrieved the  
652 information for transcripts with a similar coding sequence in the genome of *A. thaliana*.

653 Redundant transcripts were clustered using CD-HIT-EST v. 4.6.1[44], using the local  
654 alignment mode, with 95% identity and 70% coverage of the shortest sequence as thresholds.  
655 Open reading frames (ORF) in putative protein coding transcripts were identified using the  
656 Transdecoder tool (<http://transdecoder.sf.net>). We reduced redundancy of transcripts in the  
657 final assembly by keeping for each CD-HIT-EST cluster either the sequence with the longest  
658 ORF or simply the longest sequence, in the absence of sequences containing ORF.

659 The completeness of the final transcriptome was assessed using BUSCO[45].  
660 Additionally, a reciprocal blastn alignment[39] using an e-value threshold of  $10^{-10}$  and a  
661 minimum alignment length of 100 nucleotides with at least 70% identity was used to compare  
662 the *A. schaueriana* and other publicly available transcriptomes of congeneric species.

663

664 **4.6 Comparative transcriptomics using RNA-sequencing data**

665 Tissue-specific count data was obtained from the number of reads uniquely mapped to  
666 each transcript of the non-redundant transcriptome using bowtie 1[38]. Count data were  
667 normalised using the EdgeR Bioconductor package[46]. Normalised data was used to detect  
668 transcripts with significantly different counts between tissue-specific samples of trees at the  
669 Equatorial and Subtopical sampling sites, using the exact test for negative binomial  
670 distribution, with an adjusted P-value threshold of 0.05. GO term enrichment analyses of the  
671 differentially expressed transcripts (DET) were performed using the GSeq package[47],  
672 which accounts for length bias. We chose the default Wallenius approximation method and a  
673 P-value threshold of 0.05.

674 Differential expression results were verified using reverse transcription real-time PCR  
675 (qRT-PCR) (see S2 Methods).

676

677 **4.7 Detection of *A. schaueriana* candidate loci under natural selection using genome-**  
678 **wide SNP data**

679 We sampled adult plants at 10 locations, spanning most of *A. schaueriana* geographic  
680 range, complementing previous population genetic studies[22] by adding the southernmost  
681 range limit[28] (Fig 1, S1 Table). We isolated DNA from leaves sampled from 79 trees using  
682 the DNeasy Plant Mini Kit (QIAGEN) and NucleoSpin Plant II (Macherey Nagel) following  
683 the manufacturer's instructions. DNA quality and quantity were assessed using 1% agarose  
684 electrophoresis and the QuantiFluor® dsDNA System in a Quantus™ fluorometer (Promega).  
685 Nextera-tagmented, reductively-amplified DNA (nextRAD) libraries were constructed by  
686 SNPsaurus (SNPsaurus, LLC), allowing the genotyping of SNP loci across the genome in a  
687 consistent manner by using selective primer sequences[48]. Genomic DNA fragmentation and



688 short adapter ligation were performed with Nextera reagent (Illumina, Inc), followed by  
689 amplification, which utilised one of the primers matching the adapter and extending nine  
690 arbitrary nucleotides into the genomic DNA. Thus, the resulting amplicons were fixed at the  
691 selective end and their lengths depended on the initial Nextera fragmentation, leading to a  
692 consistent genotyping of the amplified loci. NextRAD libraries were then sequenced in a  
693 HiSeq 2500 (Illumina, Inc.) with 100-bp single-end chemistry following the manufacturer's  
694 protocol. Genotyping-by-sequencing used custom scripts (SNPsaurus, LLC), which created a  
695 reference catalogue of abundant reads across the combined set of samples. Read mapping to  
696 this reference allowed two mismatches. Subsequently, loci presenting sequence variation were  
697 filtered for biallelic loci and presence in at least 10% of the total samples. Following  
698 assembly, mapping and SNP identification, a second filtering step was performed by allowing  
699 no more than 65% of missing data, a Phred score  $> 30$ , 8x minimum coverage, only one SNP  
700 per loci and a minor allele frequency  $\geq 0.05$  using vcftools v0.1.12b[49]. To reduce false SNP  
701 inclusion rates due to paralogy or low-quality genotype calls, we used a maximum read  
702 coverage of 56, which resulted from the product of the average read depth and 1.5 standard  
703 deviation.

704       After excluding plants morphologically identified as *A. schaueriana* with genomic  
705 signs of hybridization with *A. germinans*, we described the overall genetic structure in *A.*  
706 *schaueriana* considering both neutral and non-neutral loci in a multivariate model-free  
707 method, the discriminant analysis of principal components (DAPC)[50], and in the  
708 ADMIXTURE 1.3.0 program[51]. For DAPC analyses, we considered the number of groups  
709 varying from 1 to 50 and the Bayesian information criteria for inferring the number of groups  
710 (K), in addition to using the optim.a.score function to avoid over-fitting during the  
711 discrimination steps. For the ADMIXTURE analyses, we performed three separate runs for K

712 varying between 1 and 15 and using the block-relaxation method for point estimation;  
713 computing was terminated when estimates increased by  $< 0.0001$ . The K-value that best  
714 described our data was determined by cross-validation.

715 To detect signs of natural selection, we used two methods to minimise false-positive  
716 results. LOSITAN[52], which uses the FDIST2 method[53], assuming an infinite allele model  
717 of mutation, using a confidence interval of 0.99, a false-discovery rate (FDR) of 0.1, the  
718 neutral mean FST and forcing the mean FST options, and pcadapt 3.0.4[54], which  
719 simultaneously identifies the population structure and the loci excessively related to this  
720 structure, using an FDR threshold of 0.1.

721 The sequences in which loci with putative evidence of selection were identified  
722 simultaneously by pcadapt and by five independent runs of LOSITAN were searched within  
723 expressed regions of the reference transcriptome. A reciprocal alignment between the short  
724 sequences obtained through nextRAD (75 bp) and the longer expressed sequences assembled  
725 from RNA-Seq data ( $\approx 300$ -11600 bp) was performed. The alignment was conducted using  
726 the blastn algorithm from the blast+ software v. 2.2.31[39], with a threshold of at least 50  
727 aligned nucleotides, a maximum of one mismatch and no gaps.

## 728 **5. Acknowledgements**

729 We thank Professors Dr. Michel A. G. Vincentz and Dr. Juliana L. S. Mayer for  
730 advising and making available their laboratory for our training and performing of,  
731 respectively, RNA extraction procedures and slides preparation used in the analyses of wood  
732 anatomy. We acknowledge Ilmarina C. de Menezes and Stephanie K. Bajay for assistance in  
733 the field. We thank Stephanie K. Bajay for also giving assistance in the germination of the  
734 propagules used in the common garden experiment. And we thank Greg Mellers and

735 Alessandro A. Pereira for critically reading the manuscript. M.V.C and G.M.M. received  
736 fellowships from the São Paulo Research Foundation (FAPESP 2013/26793-7, 2013/08086-1  
737 and 2014/22821-9). M.V.C. received fellowship from the Coordination for the Improvement  
738 of Higher Education Personnel (CAPES 8084/2015-07, Biocomputational Biology Program).  
739 G.M.M. received grant from the Brazilian National Council for Scientific and Technological  
740 Development (CNPq 448286/2014-9). A.P.S. was supported by grant from CAPES  
741 (Biocomputational Biology Program), and a received a research fellowship from CNPq  
742 (309661/2014-5).

## 743 **6. References**

- 744 1. Hereford J. A Quantitative Survey of Local Adaptation and Fitness Trade-Offs. *Am*  
745 *Nat.* 2009;173: 579–588. doi:10.1086/597611
- 746 2. Kawecki TJ, Ebert D. Conceptual issues in local adaptation. *Ecol Lett.* 2004;7: 1225–  
747 1241. doi:10.1111/j.1461-0248.2004.00684.x
- 748 3. Leimu R, Fischer M. A meta-analysis of local adaptation in plants. *PLoS One.* 2008;3:  
749 1–8. doi:10.1371/journal.pone.0004010
- 750 4. Albert CH, Grassein F, Schurr FM, Vieilledent G, Violle C. When and how should  
751 intraspecific variability be considered in trait-based plant ecology? *Perspect Plant Ecol*  
752 *Evol Syst.* 2011;13: 217–225. doi:10.1016/j.ppees.2011.04.003
- 753 5. Savolainen O, Lascoux M, Merilä J. Ecological genomics of local adaptation. *Nat Rev*  
754 *Genet.* Nature Publishing Group; 2013;14: 807–20. doi:10.1038/nrg3522
- 755 6. Barrett RDH, Hoekstra HE. Molecular spandrels: tests of adaptation at the genetic  
756 level. *Nat Rev Genet.* Nature Publishing Group; 2011;12: 767–780.  
757 doi:10.1038/nrg3015

- 758 7. Moran E V., Hartig F, Bell DM. Intraspecific trait variation across scales: Implications  
759 for understanding global change responses. *Glob Chang Biol.* 2016;22: 137–150.  
760 doi:10.1111/gcb.13000
- 761 8. Pachauri RK, Meyer LA, editors. *Climate Change 2014: Synthesis Report.*  
762 *Contribution of Working Groups I, II and III to the Fifth Assessment Report of the*  
763 *Intergovernmental Panel on Climate Change.* IPCC. Geneva, Switzerland: IPCC; 2014.
- 764 9. Loarie SR, Duffy PB, Hamilton H, Asner GP, Field CB, Ackerly DD. The velocity of  
765 climate change. *Nature.* Nature Publishing Group; 2009;462: 1052–1055.  
766 doi:10.1038/nature08649
- 767 10. Osland MJ, Feher LC, Griffith KT, Cavanaugh KC, Enwright NM, Day RH, et al.  
768 Climatic controls on the global distribution, abundance, and species richness of  
769 mangrove forests. *Ecol Monogr.* 2017;87: 341–359. doi:10.1002/ecm.1248
- 770 11. Lovelock CE, Cahoon DR, Friess DA, Guntenspergen GR, Krauss KW, Reef R, et al.  
771 The vulnerability of Indo-Pacific mangrove forests to sea-level rise. *Nature.* 2015;526:  
772 559–563. doi:10.1038/nature15538
- 773 12. Nascimento Jr. WR, Souza-Filho PWM, Proisy C, Lucas RM, Rosenqvist A. Mapping  
774 changes in the largest continuous Amazonian mangrove belt using object-based  
775 classification of multisensor satellite imagery. *Estuar Coast Shelf Sci.* 2013;117: 83–  
776 93. doi:10.1016/j.ecss.2012.10.005
- 777 13. Shearman P, Bryan J, Walsh JP. Trends in Deltaic Change over Three Decades in the  
778 Asia-Pacific Region. *J Coast Res.* 2013;29: 1169–1183. doi:10.2112/JCOASTRES-D-  
779 12-00120.1
- 780 14. Cavanaugh KC, Kellner JR, Forde AJ, Gruner DS, Parker JD, Rodriguez W, et al.  
781 Poleward expansion of mangroves is a threshold response to decreased frequency of

- 782 extreme cold events. *Proc Natl Acad Sci U S A*. 2014;111: 723–7.  
783 doi:10.1073/pnas.1315800111
- 784 15. Saintilan N, Wilson NC, Rogers K, Rajkaran A, Krauss KW. Mangrove expansion and  
785 salt marsh decline at mangrove poleward limits. *Glob Chang Biol*. 2014;20: 147–157.  
786 doi:10.1111/gcb.12341
- 787 16. Duke N, Kovacs J, Griffiths A, Preece L, J. E. Hill D, Van Oosterzee P, et al. Large-  
788 scale dieback of mangroves in Australia. *Marine and Freshwater Research*. 2017.  
789 doi:10.1071/MF16322
- 790 17. Eslami-Andargoli L, Dale P, Sipe N, Chaseling J. Mangrove expansion and rainfall  
791 patterns in Moreton Bay, Southeast Queensland, Australia. *Estuar Coast Shelf Sci*.  
792 Elsevier Ltd; 2009;85: 292–298. doi:10.1016/j.ecss.2009.08.011
- 793 18. Alongi DM. The Impact of Climate Change on Mangrove Forests. *Curr clim Chang*  
794 *Rep*. 2015;4: 516. doi:10.1007/s40641-015-0002-x
- 795 19. McKee KL, Cahoon DR, Feller IC. Caribbean mangroves adjust to rising sea level  
796 through biotic controls on change in soil elevation. *Glob Ecol Biogeogr*. 2007;16: 545–  
797 556. doi:10.1111/j.1466-8238.2007.00317.x
- 798 20. López-Medellín X, Ezcurra E, González-Abraham C, Hak J, Santiago LS, Sickman JO.  
799 Oceanographic anomalies and sea-level rise drive mangroves inland in the Pacific coast  
800 of Mexico. *J Veg Sci*. 2011;22: 143–151. doi:10.1111/j.1654-1103.2010.01232.x
- 801 21. Doyle TW, Krauss KW, Conner WH, From AS. Forest Ecology and Management  
802 Predicting the retreat and migration of tidal forests along the northern Gulf of Mexico  
803 under sea-level rise. *For Ecol Manage*. 2010;259: 770–777.  
804 doi:10.1016/j.foreco.2009.10.023
- 805 22. Mori GM, Zucchi MI, Souza AP. Multiple-Geographic-Scale Genetic Structure of Two

- 806 Mangrove Tree Species: The Roles of Mating System, Hybridization, Limited  
807 Dispersal and Extrinsic Factors. *PLoS One*. 2015;10: e0118710.  
808 doi:10.1371/journal.pone.0118710
- 809 23. Francisco PM, Mori GM, Alves FM, Tambarussi E, Souza AP De. Population genetic  
810 structure, introgression, and hybridization in the genus *Rhizophora* along the Brazilian  
811 coast. *Ecol Evol*. 2018; 1–14. doi:10.1002/ece3.3900
- 812 24. Pil MW, Boeger MRT, Muschner VC, Pie MR, Ostrensky A, Boeger W a. Postglacial  
813 north-south expansion of populations of *Rhizophora mangle* (Rhizophoraceae) along  
814 the Brazilian coast revealed by microsatellite analysis. *Am J Bot*. 2011;98: 1031–1039.  
815 doi:10.3732/ajb.1000392
- 816 25. Takayama K, Tateishi Y, Murata J, Kajita T. Gene flow and population subdivision in  
817 a pantropical plant with sea-drifted seeds *Hibiscus tiliaceus* and its allied species:  
818 Evidence from microsatellite analyses. *Mol Ecol*. 2008;17: 2730–2742.  
819 doi:10.1111/j.1365-294X.2008.03799.x
- 820 26. Savolainen O, Pyhäjärvi T, Knürr T. Gene Flow and Local Adaptation in Trees. *Annu*  
821 *Rev Ecol Evol Syst*. 2007;38: 595–619.  
822 doi:10.1146/annurev.ecolsys.38.091206.095646
- 823 27. Andrews KR, Good JM, Miller MR, Luikart G, Hohenlohe PA. Harnessing the power  
824 of RADseq for ecological and evolutionary genomics. *Nat Rev Genet*. Nature  
825 Publishing Group; 2016;17: 81–92. doi:10.1038/nrg.2015.28
- 826 28. Soares MLG, Estrada GCD, Fernandez V, Tognella MMP. Southern limit of the  
827 Western South Atlantic mangroves: Assessment of the potential effects of global  
828 warming from a biogeographical perspective. *Estuar Coast Shelf Sci*. Elsevier Ltd;  
829 2012;101: 44–53. doi:10.1016/j.ecss.2012.02.018

- 830 29. Souza-Filho PWM, Cohen MCL, Lara RJ, Lessa GC, Koch B, Behling H. Holocene  
831 Coastal Evolution and Facies Model of the Bragança Macrotidal Flat on the Amazon  
832 Mangrove Coast, Northern Brazil. *J Coast Res.* 2006; 306–310.
- 833 30. Kjerfve B, Perillo GME, Gardner LR, Rine JM, Dias GTM, Mochel FR. Chapter  
834 Twenty Morphodynamics of muddy environments along the Atlantic coasts of North  
835 and South America. *Proc Mar Sci. Elsevier*; 2002;4: 479–532. doi:10.1016/S1568-  
836 2692(02)80094-8
- 837 31. Hijmans RJ, Cameron SE, Parra JL, Jones PG, Jarvis A. Very high resolution  
838 interpolated climate surfaces for global land areas. *Int J Climatol.* 2005;25: 1965–1978.  
839 doi:10.1002/joc.1276
- 840 32. Sbrocco EJ, Barber PH. MARSPEC: ocean climate layers for marine spatial ecology.  
841 *Ecology.* 2013;94: 979–979. doi:10.1890/12-1358.1
- 842 33. Reef R, Winter K, Morales J, Adame MF, Reef DL, Lovelock CE. The effect of  
843 atmospheric carbon dioxide concentrations on the performance of the mangrove  
844 *Avicennia germinans* over a range of salinities. *Physiol Plant.* 2014;154.  
845 doi:10.1111/ppl.12289
- 846 34. Schneider CA, Rasband WS, Eliceiri KW. NIH Image to ImageJ: 25 years of image  
847 analysis. *Nat Methods. Nature Publishing Group*; 2012;9: 671–675.  
848 doi:10.1038/nmeth.2089
- 849 35. Scholz A, Klepsch M, Karimi Z, Jansen S. How to quantify conduits in wood? *Front*  
850 *Plant Sci.* 2013;4: 1–11. doi:10.3389/fpls.2013.00056
- 851 36. Oliveira RR, Viana AJC, Reátegui ACE, Vincentz MGA. An efficient method for  
852 simultaneous extraction of high-quality RNA and DNA from various plant tissues.  
853 *Genet Mol Res.* 2015;14: 18828–18838. doi:10.4238/2015.December.28.32

- 854 37. Patel RK, Jain M. NGS QC toolkit: A toolkit for quality control of next generation  
855 sequencing data. *PLoS One*. 2012;7. doi:10.1371/journal.pone.0030619
- 856 38. Langmead B, Trapnell C, Pop M, Salzberg S. Ultrafast and memory-efficient  
857 alignment of short DNA sequences to the human genome. *Genome Biol*. 2009;10: R25.  
858 doi:10.1186/gb-2009-10-3-r25
- 859 39. Camacho C, Coulouris G, Avagyan V, Ma N, Papadopoulos J, Bealer K, et al.  
860 BLAST+: architecture and applications. *BMC Bioinformatics*. 2009;10: 421.  
861 doi:10.1186/1471-2105-10-421
- 862 40. O’Leary NA, Wright MW, Brister JR, Ciuffo S, Haddad D, McVeigh R, et al.  
863 Reference sequence (RefSeq) database at NCBI: Current status, taxonomic expansion,  
864 and functional annotation. *Nucleic Acids Res*. 2016;44: D733–D745.  
865 doi:10.1093/nar/gkv1189
- 866 41. Berardini TZ, Reiser L, Li D, Mezheritsky Y, Muller R, Strait E, et al. The Arabidopsis  
867 Information Resource: Making and Mining the “ Gold Standard ” Annotated  
868 Reference Plant Genome. *Genesis*. 2015;53: 474–485. doi:10.1002/dvg.22877
- 869 42. Finn RD, Bateman A, Clements J, Coghill P, Eberhardt RY, Eddy SR, et al. Pfam: The  
870 protein families database. *Nucleic Acids Res*. 2014;42: 222–230.  
871 doi:10.1093/nar/gkt1223
- 872 43. Blake JA, Christie KR, Dolan ME, Drabkin HJ, Hill DP, Ni L, et al. Gene ontology  
873 consortium: Going forward. *Nucleic Acids Res*. 2015;43: D1049–D1056.  
874 doi:10.1093/nar/gku1179
- 875 44. Li W, Godzik A. Cd-hit: A fast program for clustering and comparing large sets of  
876 protein or nucleotide sequences. *Bioinformatics*. 2006;22: 1658–1659.  
877 doi:10.1093/bioinformatics/btl158



- 878 45. Simão FA, Waterhouse RM, Ioannidis P, Kriventseva E V., Zdobnov EM. BUSCO:  
879 Assessing genome assembly and annotation completeness with single-copy orthologs.  
880 Bioinformatics. 2015;31: 3210–3212. doi:10.1093/bioinformatics/btv351
- 881 46. Robinson MD, McCarthy DJ, Smyth GK. edgeR: a Bioconductor package for  
882 differential expression analysis of digital gene expression data. Bioinformatics.  
883 2010;26: 139–140. doi:10.1093/bioinformatics/btp616
- 884 47. Young MD, Wakefield MJ, Smyth GK, Oshlack A. Gene ontology analysis for RNA-  
885 seq: accounting for selection bias. Genome Biol. 2010;11. doi:10.1186/gb-2010-11-2-  
886 r14
- 887 48. Russello MA, Waterhouse MD, Etter PD, Johnson EA. From promise to practice:  
888 pairing non-invasive sampling with genomics in conservation. PeerJ. 2015;3: e1106.  
889 doi:10.7717/peerj.1106
- 890 49. Danecek P, Auton A, Abecasis G, Albers CA, Banks E, DePristo MA, et al. The  
891 variant call format and VCFtools. Bioinformatics. 2011;27: 2156–2158.  
892 doi:10.1093/bioinformatics/btr330
- 893 50. Jombart T, Devillard S, Balloux F. Discriminant analysis of principal components: a  
894 new method for the analysis of genetically structured populations. BMC Genet.  
895 BioMed Central Ltd; 2010;11: 94. doi:10.1186/1471-2156-11-94
- 896 51. Alexander DH, Novembre J, Lange K. Fast model-based estimation of ancestry in  
897 unrelated individuals. Genome Res. 2009;19: 1655–1664. doi:10.1101/gr.094052.109
- 898 52. Antao T, Lopes A, Lopes RJ, Beja-Pereira A, Luikart G. LOSITAN: A workbench to  
899 detect molecular adaptation based on a  $F_{st}$ -outlier method. BMC Bioinformatics.  
900 2008;9: 1–5. doi:10.1186/1471-2105-9-323
- 901 53. Beaumont MA, Nichols RA. Evaluating Loci for Use in the Genetic Analysis of

- 902 Population Structure. *Proc R Soc B Biol Sci.* 1996;263: 1619–1626.  
903 doi:10.1098/rspb.1996.0237
- 904 54. Luu K, Bazin E, Blum MGB. pcadapt: An R package to perform genome scans for  
905 selection based on principal component analysis. *Mol Ecol Resour.* 2016;33: 67–77.  
906 doi:10.1111/1755-0998.12592
- 907 55. Wang Z, Gerstein M, Snyder M. RNA-Seq: a revolutionary tool for transcriptomics.  
908 *Nat Rev Genet.* 2009;10: 57–63.
- 909 56. Huang J, Lu X, Zhang W, Huang R, Chen S, Zheng Y. Transcriptome Sequencing and  
910 Analysis of Leaf Tissue of *Avicennia marina* Using the Illumina Platform. *PLoS One.*  
911 2014;9: e108785. doi:10.1371/journal.pone.0108785
- 912 57. Lyu H, Li X, Guo Z, He Z, Shi S. De novo assembly and annotation of the *Avicennia*  
913 *officinalis* L. transcriptome. *Mar Genomics. Elsevier B.V.;* 2017; 2–5.  
914 doi:10.1016/j.margen.2017.07.002
- 915 58. Krishnamurthy P, Mohanty B, Wijaya E, Lee D, Lim T, Lin Q, et al. Transcriptomics  
916 analysis of salt stress tolerance in the roots of the mangrove *Avicennia officinalis*. *Nat*  
917 *Sci Reports.* 2017;7: 1–19. doi:10.1038/s41598-017-10730-2
- 918 59. Park S-Y, Yu J-W, Park J-S, Li J, Yoo S-C, Lee N-Y, et al. The Senescence-Induced  
919 Staygreen Protein Regulates Chlorophyll Degradation. *Plant Cell.* 2007;19: 1649–  
920 1664. doi:10.1105/tpc.106.044891
- 921 60. Myouga F, Hosoda C, Umezawa T, Iizumi H, Kuromori T, Motohashi R, et al. A  
922 Heterocomplex of Iron Superoxide Dismutases Defends Chloroplast Nucleoids against  
923 Oxidative Stress and Is Essential for Chloroplast Development in *Arabidopsis*. *Plant*  
924 *Cell Online.* 2008;20: 3148–3162. doi:10.1105/tpc.108.061341
- 925 61. Wang S, Bai G, Wang S, Yang L, Yang F, Wang Y. Chloroplast RNA-Binding Protein

- 926 RBD1 Promotes Chilling Tolerance through 23S rRNA Processing in Arabidopsis.  
927 PLoS Genet. 2016;12: 1–21. doi:10.1371/journal.pgen.1006027
- 928 62. Goulas E, Schubert M, Kieselbach T, Kleczkowski LA, Gardestro P, Schro W. The  
929 chloroplast lumen and stromal proteomes of Arabidopsis thaliana show differential  
930 sensitivity to short- and long-term exposure to low temperature. Plant J. 2006;47: 720–  
931 734. doi:10.1111/j.1365-313X.2006.02821.x
- 932 63. Kim YO, Kim JS, Kang H. Cold-inducible zinc finger-containing glycine-rich RNA-  
933 binding protein contributes to the enhancement of freezing tolerance in Arabidopsis  
934 thaliana. Plant J. 2005;42: 890–900. doi:10.1111/j.1365-313X.2005.02420.x
- 935 64. Hartung F, Suer S, Puchta H. Two closely related RecQ helicases have antagonistic  
936 roles in homologous recombination and DNA repair in Arabidopsis thaliana. Proc Natl  
937 Acad Sci. 2007;104: 18836–18841. doi:10.1073/pnas.0705998104
- 938 65. Michaels SD, Ditta G, Gustafson-Brown C, Pelaz S, Yanofsky M, Amasino RM.  
939 AGL24 acts as a promoter of flowering in Arabidopsis and is positively regulated by  
940 vernalization. Plant J. 2003;33: 867–874. doi:10.1046/j.1365-313X.2003.01671.x
- 941 66. Jung YJ, Melencion SMB, Lee ES, Park JH, Alinapon CV, Oh HT, et al. Universal  
942 Stress Protein Exhibits a Redox-Dependent Chaperone Function in Arabidopsis and  
943 Enhances Plant Tolerance to Heat Shock and Oxidative Stress. Front Plant Sci. 2015;6:  
944 1–11. doi:10.3389/fpls.2015.01141
- 945 67. Ogawa T, Pan L, Kawai-Yamada M, Yu L-H, Yamamura S, Koyama T, et al.  
946 Functional Analysis of Arabidopsis Ethylene-Responsive Element Binding Protein  
947 Conferring Resistance to Bax. Plant Physiol. 2005;138: 1436–1445.  
948 doi:10.1104/pp.105.063586.1436
- 949 68. Lin RC, Park HJ, Wang HY. Role of Arabidopsis RAP2.4 in regulating light- and

- 950 ethylene-mediated developmental processes and drought stress tolerance. *Mol Plant*.  
951 The Authors 2007. All rights reserved.; 2008;1: 42–57. doi:10.1093/mp/ssm004
- 952 69. Rae L, Lao NT, Kavanagh TA. Regulation of multiple aquaporin genes in Arabidopsis  
953 by a pair of recently duplicated DREB transcription factors. *Planta*. 2011;234: 429–  
954 444. doi:10.1007/s00425-011-1414-z
- 955 70. Alexandersson E, Fraysse L, Sjövall-Larsen S, Gustavsson S, Fellert M, Karlsson M, et  
956 al. Whole gene family expression and drought stress regulation of aquaporins. *Plant*  
957 *Mol Biol*. 2005;59: 469–484. doi:10.1007/s11103-005-0352-1
- 958 71. Nishizawa A, Yabuta Y, Shigeoka S. Galactinol and Raffinose Constitute a Novel  
959 Function to Protect Plants from Oxidative Damage. *Plant Physiol*. 2008;147: 1251–  
960 1263. doi:10.1104/pp.108.122465
- 961 72. Zhang A, Ren H-M, Tan Y-Q, Qi G-N, Yao F-Y, Wu G-L, et al. S-Type Anion  
962 Channels SLAC1 and SLAH3 Function as Essential Negative Regulators of Inward K<sup>+</sup>  
963 Channels and Stomatal Opening in Arabidopsis. *Plant Cell*. 2016;28: 949–965.  
964 doi:10.1105/tpc.15.01050
- 965 73. Liepman AH, Olsen LJ. Alanine aminotransferase homologs catalyze the  
966 glutamate:glyoxylate aminotransferase reaction in peroxisomes of Arabidopsis. *Plant*  
967 *Physiol*. 2003;131: 215–27. doi:10.1104/pp.011460
- 968 74. Wolf JBW, Lindell J, Backstrom N. Speciation genetics: current status and evolving  
969 approaches. *Philos Trans R Soc B Biol Sci*. 2010;365: 1717–1733.  
970 doi:10.1098/rstb.2010.0023
- 971 75. Ahrens CW, Rymer PD, Stow A, Bragg J, Dillon S, Umbers KDL, et al. The search for  
972 loci under selection: trends, biases and progress. *Mol Ecol*. 2018;  
973 doi:doi.org/10.1111/mec.14549

- 974 76. Sakamoto H, Araki T, Meshi T, Iwabuchi M. Expression of a subset of the Arabidopsis  
975 Cys2/His2-type zinc-finger protein gene family under water stress. *Gene*. 2000;248:  
976 23–32. doi:10.1016/S0378-1119(00)00133-5
- 977 77. Giuntoli B, Lee SC, Licausi F, Kosmacz M, Oosumi T, van Dongen JT, et al. A  
978 Trihelix DNA Binding Protein Counterbalances Hypoxia-Responsive Transcriptional  
979 Activation in Arabidopsis. *PLoS Biol*. 2014;12. doi:10.1371/journal.pbio.1001950
- 980 78. Tohge T, Nishiyama Y, Hirai MY, Yano M, Nakajima JI, Awazuhara M, et al.  
981 Functional genomics by integrated analysis of metabolome and transcriptome of  
982 Arabidopsis plants over-expressing an MYB transcription factor. *Plant J*. 2005;42:  
983 218–235. doi:10.1111/j.1365-313X.2005.02371.x
- 984 79. Bohne A V., Schwenkert S, Grimm B, Nickelsen J. Roles of Tetratricopeptide Repeat  
985 Proteins in Biogenesis of the Photosynthetic Apparatus [Internet]. *International Review*  
986 *of Cell and Molecular Biology*. Elsevier Inc.; 2016. doi:10.1016/bs.ircmb.2016.01.005
- 987 80. Reef R, Lovelock CE. Regulation of water balance in Mangroves. *Ann Bot*. 2015;115:  
988 385–395. doi:10.1093/aob/mcu174
- 989 81. Steyn WJ, Wand SJE, Holcroft DM, Jacobs G. Anthocyanins in vegetative tissues: a  
990 proposed unified function in photoprotection. *New Phytol*. 2002;155: 349–361.  
991 doi:10.1046/j.1469-8137.2002.00482.x
- 992 82. Menezes MPM de, Berger U, Mehlig U. Mangrove vegetation in Amazonia: a review  
993 of studies from the coast of Pará and Maranhão States, north Brazil. *Acta Amaz*.  
994 2008;38: 403–420. doi:10.1590/S0044-59672008000300004
- 995 83. De Alvarenga AMSB, Botosso PC, Soffiatti P. Stem growth and phenology of three  
996 subtropical mangrove tree species. *Brazilian J Bot*. 2017; doi:10.1007/s40415-017-  
997 0397-9

- 998 84. Kazan K, Lyons R. The link between flowering time and stress tolerance. *J Exp Bot.*  
999 2016;67: 47–60. doi:10.1093/jxb/erv441
- 1000 85. Stuart SA, Choat B, Martin KC, Holbrook NM, Ball MC. The role of freezing in  
1001 setting the latitudinal limits of mangrove forests. *New Phytol.* 2006;173: 576–583.  
1002 doi:10.1111/j.1469-8137.2006.01938.x
- 1003 86. Carlson JE, Holsinger KE, Prunier R. Plant responses to climate in the cape floristic  
1004 region of South Africa: Evidence for adaptive differentiation in the proteaceae.  
1005 *Evolution (N Y).* 2011;65: 108–124. doi:10.1111/j.1558-5646.2010.01131.x
- 1006 87. Saenger P, Snedaker SC. Pantropical trends in mangrove above-ground biomass and  
1007 annual litterfall. *Oecologia.* 1993;96: 293–299. doi:10.1007/BF00317496
- 1008 88. Krishnamurthy P, Jyothi-Prakash PA, Qin L, He J, Lin Q, Loh CS, et al. Role of root  
1009 hydrophobic barriers in salt exclusion of a mangrove plant *Avicennia officinalis*. *Plant,*  
1010 *Cell Environ.* 2014;37: 1656–1671. doi:10.1111/pce.12272
- 1011 89. Maurel C, Verdoucq L, Luu D-T, Santoni V. Plant Aquaporins: Membrane Channels  
1012 with Multiple Integrated Functions. *Annu Rev Plant Biol.* 2008;59: 595–624.  
1013 doi:10.1146/annurev.arplant.59.032607.092734
- 1014 90. Gall H Le, Philippe F, Domon J-M, Gillet F, Pelloux J, Rayon C. Cell Wall  
1015 Metabolism in Response to Abiotic Stress. *Plants.* 2015;4: 112–166.  
1016 doi:10.3390/plants4010112
- 1017 91. Pecot SD, Horsley SB, Battaglia MA, Mitchell RJ. The influence of canopy, sky  
1018 condition, and solar angle on light quality in a longleaf pine woodland. *Can J For Res.*  
1019 2005;35: 1356–1366. doi:10.1139/x05-069
- 1020 92. Kimura M, Yamamoto YY, Seki M, Sakurai T, Sato M, Abe T, et al. Identification of  
1021 *Arabidopsis* Genes Regulated by High Light – Stress Using cDNA Microarray.

- 1022 Photochem Photobiol. 2003;77: 226–233. doi:<https://doi.org/10.1562/0031-8655>
- 1023 93. Murchie EH, Hubbart S, Peng S, Horton P. Acclimation of photosynthesis to high  
1024 irradiance in rice: Gene expression and interactions with leaf development. *J Exp Bot.*  
1025 2005;56: 449–460. doi:10.1093/jxb/eri100
- 1026 94. Wang D, Pan Y, Zhao X, Zhu L, Fu B, Li Z. Genome-wide temporal-spatial gene  
1027 expression profiling of drought responsiveness in rice. *BMC Genomics.* 2011;12.  
1028 doi:10.1186/1471-2164-12-149
- 1029 95. Moumeni A, Satoh K, Kondoh H, Asano T, Hosaka A, Venuprasad R, et al.  
1030 Comparative analysis of root transcriptome profiles of two pairs of drought-tolerant  
1031 and susceptible rice near-isogenic lines under different drought stress. *BMC Plant Biol.*  
1032 2011;11. doi:10.1186/1471-2229-11-174
- 1033 96. Bray EA. Genes commonly regulated by water-deficit stress in *Arabidopsis thaliana*. *J*  
1034 *Exp Bot.* 2004;55: 2331–2341. doi:10.1093/jxb/erh270
- 1035 97. Zhang C, Zhang L, Zhang S, Zhu S, Wu P, Chen Y, et al. Global analysis of gene  
1036 expression profiles in physic nut (*Jatropha curcas* L.) seedlings exposed to drought  
1037 stress. *BMC Plant Biol.* 2015;15: 1–14. doi:10.1186/s12870-014-0397-x
- 1038 98. Hasanuzzaman M, Nahar K, Alam MM, Roychowdhury R, Fujita M. Physiological,  
1039 biochemical, and molecular mechanisms of heat stress tolerance in plants. *Int J Mol*  
1040 *Sci.* 2013;14: 9643–9684. doi:10.3390/ijms14059643
- 1041 99. Han F, Chen H, Li XJ, Yang MF, Liu GS, Shen SH. A comparative proteomic analysis  
1042 of rice seedlings under various high-temperature stresses. *Biochim Biophys Acta.*  
1043 Elsevier B.V.; 2009;1794: 1625–1634. doi:10.1016/j.bbapap.2009.07.013
- 1044 100. Wong CE, Li Y, Labbe A, Guevara D, Nuin P, Whitty B, et al. Transcriptional  
1045 profiling implicates novel interactions between abiotic stress and hormonal responses

- 1046           in *Thellungiella*, a close relative of *Arabidopsis*. *Plant Physiol.* 2006;140: 1437–1450.  
1047           doi:10.1104/pp.105.070508
- 1048   101. Munné-Bosch S, Alegre L. Die and let live: Leaf senescence contributes to plant  
1049           survival under drought stress. *Funct Plant Biol.* 2004;31: 203–216.  
1050           doi:10.1071/FP03236
- 1051   102. Millar AH, Whelan J, Soole KL, Day DA. Organization and Regulation of  
1052           Mitochondrial Respiration in Plants. *Annu Rev Plant Biol.* 2011;62: 79–104.  
1053           doi:10.1146/annurev-arplant-042110-103857
- 1054   103. Raghavendra AS, Padmasree K. Beneficial interactions of mitochondrial metabolism  
1055           with photosynthetic carbon assimilation. *Trends Plant Sci.* 2003;8: 546–553.  
1056           doi:10.1016/j.tplants.2003.09.015
- 1057   104. Atkin OK, Macherel D. The crucial role of plant mitochondria in orchestrating drought  
1058           tolerance. *Ann Bot.* 2009;103: 581–597. doi:10.1093/aob/mcn094
- 1059   105. Schaeffer-Novelli Y, Cintrón-Molero G, Adaime RR, de Camargo TM. Variability of  
1060           mangrove ecosystems along the Brazilian coast. *Estuaries.* 1990;13: 204–218.  
1061           doi:10.1007/BF02689854
- 1062   106. Godoy MDP, De Lacerda LD. Mangroves Response to Climate Change: A Review of  
1063           Recent Findings on Mangrove Extension and Distribution. *Ann Brazilian Acad Sci.*  
1064           2015;87: 651–667. doi:10.1590/0001-3765201520150055
- 1065   107. Ellison JC. Vulnerability assessment of mangroves to climate change and sea-level rise  
1066           impacts. *Wetl Ecol Manag.* 2015;23: 115–137. doi:10.1007/s11273-014-9397-8
- 1067   108. Saenger P, Moverly J. Vegetative phenology along the Queensland coastline. *Proc Ecol*  
1068           *Soc Aust.* 1985;13: 257–265.
- 1069   109. Doughty CE, Metcalfe DB, Girardin CAJ, Amézquita FF, Cabrera DG, Huasco WH, et



- 1070 al. Drought impact on forest carbon dynamics and fluxes in Amazonia. *Nature*.  
1071 2015;519: 78–82. doi:10.1038/nature14213
- 1072 110. Rowland L, da Costa ACL, Galbraith DR, Oliveira RS, Binks OJ, Oliveira AAR, et al.  
1073 Death from drought in tropical forests is triggered by hydraulics not carbon starvation.  
1074 *Nature*. 2015;528: 119–122. doi:<https://doi.org/10.1038/nature15539>
- 1075 111. Moritz C. Defining “Evolutionarily Significant Units” for conservation. *Trends Ecol*  
1076 *Evol*. 1994;9: 373–375. doi:10.1016/0169-5347(94)90057-4
- 1077 112. Wee AKS, Mori GM, Lira-Medeiros CF, Núñez-Farfán J, Takayama K, Faulks L, et al.  
1078 The integration and application of genomic information in mangrove conservation.  
1079 *Conserv Biol*. 2018; 1–40. doi:10.1111/cobi.13140
- 1080 113. Ikeda DH, Max TL, Allan GJ, Lau MK, Shuster SM, Whitham TG. Genetically  
1081 informed ecological niche models improve climate change predictions. *Glob Chang*  
1082 *Biol*. 2017;23: 164–176. doi:10.1111/gcb.13470
- 1083 114. Alvares CA, Stape JL, Sentelhas PC, Gonçalves JL de M, Sparovek G. Köppen’s  
1084 climate classification map for Brazil. *Meteorol Zeitschrift*. 2013;22: 711–728.  
1085 doi:10.1127/0941-2948/2013/0507
- 1086 115. Forsythe WC, Rykiel EJ, Stahl RS, Wu H i., Schoolfield RM. A model comparison for  
1087 daylength as a function of latitude and day of year. *Ecol Modell*. 1995;80: 87–95.  
1088 doi:10.1016/0304-3800(94)00034-F
- 1089 116. McRae GJ. A Simple Procedure for Calculating Atmospheric Water Vapor  
1090 Concentration. *J Air Pollut Control Assoc*. 1980;30: 394–394.  
1091 doi:10.1080/00022470.1980.10464362
- 1092

1093 **6. Supporting information captions**

1094

1095 **S1 Fig. Climate characterisation of Equatorial and Subtropical sampling sites.** Points  
1096 represent the monthly means of climate variables (2008-2017). Red line: Equatorial site  
1097 (Tracuateua automatic station); blue line: Subtropical site (Santa Marta automatic station).  
1098 Source: Brazilian National Institute of Meteorology (INMET). (A) Average temperature; (B)  
1099 average maximum temperature; (C) average minimum temperature; (D) average solar  
1100 irradiance; (E) total precipitation; (F) average air humidity; (G) average air vapour pressure  
1101 deficit (VPD), estimated according to McRae(McRae, 1980).

1102

1103 **S2 Fig. Daily curves of gas exchange in leaves of seven-months-old *Avicennia***  
1104 ***schaueriana* seedlings grown in a common-garden.** Points represent the means  $\pm$  standard  
1105 error bars. Stars (\*) represent rejection of the null hypothesis of the absence of a difference  
1106 based on the unpaired Student's t-test at a significance threshold of 0.05 (n = 10 plants per  
1107 group). Red line: equatorial origin; blue line: Subtropical origin. (A) Transpiration rate; (B)  
1108 stomatal conductance; (C) rate of net CO<sub>2</sub> assimilation.

1109

1110 **S3 Fig. *Avicennia schaueriana* from Equatorial and Subtropical sites grown in common-**  
1111 **garden.** (A) Geographical distribution of the species (green shaded zone) and location of the  
1112 Equatorial (red dot) and the Subtropical (blue dot) sampling sites of propagules used in the  
1113 experiment conducted in a green house (black square); (B) propagules germinating in trays  
1114 filled with mangrove soil; (C-D) seedlings from the Equatorial and from the Subtropical  
1115 sampling sites on the 80th day of the experiment; (E-F) seedlings from the Equatorial and  
1116 Subtropical sampling sites on the 225th day of the experiment; (G) seven-months-old

1117 *Avicennia schaueriana* from the Equatorial sampling site presenting flower buds and flowers;  
1118 (H-I) micrographs of stem transverse sections from pith to the outermost growth section of  
1119 one representative seedling from the Equatorial and Subtropical sampling sites  
1120 (magnification = 10x); stem sections were stained with Astra Blue and Safranin O; V: xylem  
1121 vessels; Ph: phloem; CCC: vascular cambium.

1122

1123 **S4 Fig. Sampling of *Avicennia schaueriana* plant material used for RNA-Sequencing.**

1124 (A) Geographical distribution of the species (green zone) and locations of the Equatorial (red  
1125 dot) and Subtropical (blue dot) sampling sites; (B) sampling in the native environment (top)  
1126 and plant organs used for RNA extraction and sequencing (bottom).

1127

1128 **S5 Fig. Characterisation of the *de novo* assembly of the *Avicennia schaueriana* reference**

1129 **transcriptome.** (A) Histogram of the length of putative protein-coding and putative non-  
1130 coding transcripts; (B) classification of all predicted open reading frames (ORF) in the  
1131 reference transcriptome: complete, partial 3' (missing stop codon), partial 5' (missing start  
1132 codon), internal (missing both start and stop codons); (C) annotation of transcripts via blastx  
1133 using The *Arabidopsis* Information Resource (TAIR) protein database and The National  
1134 Center for Biotechnology Information (NCBI) RefSeq Plant protein database; (D) blastx top-  
1135 hit species distribution of transcripts annotations using NCBI RefSeq Plant protein database  
1136 as reference.

1137

1138 **S6 Fig. Detection of differentially expressed transcripts (DET) and Gene Ontology (GO)**

1139 **enrichment analysis.** (A-C) Two-dimensional scatterplot of distances among transcript  
1140 expression profiles in leaf, stem and flower samples (left to right) of *Avicennia schaueriana*  
1141 trees under field conditions; points represent individual samples, and distances are

1142 approximately the log<sub>2</sub>-transformed fold changes between samples; red points represent  
1143 samples from the Equatorial site and blue points represent samples from the Subtropical site.  
1144 (D-F) MA-plots of transcript expression in leaves, stems and flowers; red points represent  
1145 DET overexpressed in Equatorial samples; blue points represent DET overexpressed in  
1146 Subtropical samples; black points represent non-differentially expressed transcripts; grey  
1147 horizontal lines represent  $\pm 1$  log fold-change threshold. (G-H) Proportion of DET used in the  
1148 GO enrichment analysis represented in blue and red bars. Annotation of putative coding  
1149 genes was obtained using the blastx algorithm with *Arabidopsis thaliana* proteins as a  
1150 reference; grey bars represent putative non-coding transcripts that are differentially  
1151 expressed, and black bars represent putative coding transcripts that are differentially  
1152 expressed but not annotated. (I-L) Examples of Gene Ontology (GO) terms enriched among  
1153 overexpressed transcripts (DET) in Subtropical leaf samples; in Equatorial leaf samples; in  
1154 Subtropical stem samples and in Equatorial stem samples. GO terms are ordered from the top  
1155 down based on the P- value of enrichment (low to high, all < 0.05). Coloured bars represent  
1156 the percentage of all DET that belong to each of the listed categories. Black bars represent the  
1157 percentage of all transcripts in the reference transcriptome belonging to each category. Plant  
1158 material of adult trees was sampled under field conditions, during the end of winter in the  
1159 Subtropical site and in the beginning of the dry season in the Equatorial site. The complete  
1160 lists of enriched GO terms are presented in S5-S8 Tables.

1161

1162 **S7 Fig. Validation of RNA-Sequencing-based differential expression of transcripts by**  
1163 **reverse transcription real time PCR (qRT-PCR).** Each bar represents the relative  
1164 expression of one sequenced sample. Error bars represent the standard deviation of the mean  
1165 from three technical replicates of the same individual sample. Red bars represent samples  
1166 from the Equatorial sampling site and blue bars, samples from the Subtropical sampling site.

1167 Non-parametric unpaired Mann-Whitney Wilcoxon U-tests were used to compare the  
1168 distributions. The differential expression detected *in silico* was confirmed *in vitro* for all  
1169 putative genes, at a significance threshold of 0.05. Putative genes selected for the validation  
1170 of the RNA-Seq data and primers sequences are described in S10 Table.

1171

1172 **S8 Fig. Population structure of *A. schaueriana*, inferred from genome-wide genotyping**  
1173 **of single nucleotide polymorphic (SNP) loci.** (A) Density of individuals on the discriminant  
1174 function, calculated using a multivariate method, the discriminant analysis of principal  
1175 components (DAPC); different colours represent different inferred populations; (B) map  
1176 showing the distribution of the species (green shaded area), the geographical location of  
1177 sampling sites (points) and barplots in which each colour denotes an ancestral cluster and  
1178 each line represents an individual as inferred by the method implemented in Admixture 1.3.0.

1179

1180 **S9 Fig. Environmental data in the glasshouse and at the source sites of propagules used**  
1181 **in the common-garden experiment.** Green line: glasshouse; red line: Equatorial site  
1182 (Tracuateua automatic station, source: Brazilian National Institute of Meteorology  
1183 (INMET)); blue line: Subtropical site (Santa Marta automatic station, source: INMET).  
1184 Multiple comparisons of periodic data of each environmental variable measured during the  
1185 experiment were performed using ANOVA and post-hoc Tukey HSD tests with a  
1186 significance threshold of 0.05. \* represents significant difference and hyphen (-) represents  
1187 an absence of a significant difference. (A) Average temperature; (B) average maximum  
1188 temperature; (C) average minimum temperature; (D) average air humidity; (E) average air  
1189 vapour pressure deficit (VPD).

1190

1191 **S1 Table. Morphological traits analysed in *Avicennia schaueriana* saplings from**  
1192 **Equatorial and Subtropical sites, grown under the same environmental conditions in a**  
1193 **glasshouse.**

1194

1195 **S2 Table. Transcriptome quality parameters assessed in this work.**

1196

1197 **S3 Table. Transcriptome size characterisation.**

1198

1199 **S4 Table. Putative orthologous expressed sequences between the *Avicennia schaueriana***  
1200 **transcriptome sequenced in this work and publicly available transcriptomes from other**  
1201 **congeneric.**

1202

1203 **S5 Table. Enriched Gene Ontology (GO) terms among differentially expressed**  
1204 **transcripts (DET) that presented higher expression in Subtropical stem samples than in**  
1205 **Equatorial stem samples.**

1206

1207 **S6 Table. Enriched Gene Ontology (GO) terms among differentially expressed**  
1208 **transcripts (DET) that presented higher expression in Equatorial stem samples than in**  
1209 **Subtropical stem samples.**

1210

1211 **S7 Table. Enriched Gene Ontology (GO) terms among differentially expressed**  
1212 **transcripts (DET) that presented higher expression in Subtropical leaf samples than in**  
1213 **Equatorial leaf samples.**

1214

1215 **S8 Table. Enriched Gene Ontology (GO) terms among differentially expressed**  
1216 **transcripts (DET) that presented higher expression in Equatorial leaf samples than in**  
1217 **Subtropical leaf samples.**

1218

1219 **S9 Table. Differentially expressed transcripts of *Avicennia schaueriana* involved in the**  
1220 **response to contrasting climate conditions between Equatorial and Subtropical sites.**

1221

1222 **S10 Table. Oligonucleotides used in qRT-PCR reactions in this work.**

1223

1224 **S11 Table. Sampling sites for plant material used in nextRAD sequencing.**

1225

1226 **S12 Table. Single Nucleotide Polymorphic loci (SNP) with signature of selection present**  
1227 **in putative protein-coding regions of the genome of *Avicennia schaueriana*.**

1228

1229 **S1 Method. Propagules and RNA sampling sites characterization.**

1230

1231 **S2 Method. RNA-sequencing data verification through qRT-PCR.**

1232

1233 **S1 Result. Validation of RNA-Seq data through qRT-PCR.**

1234

1235 **S1 Data. Morphological traits analysed in *Avicennia schaueriana* saplings from**  
1236 **Equatorial and Subtropical sites, grown under the same environmental conditions in a**  
1237 **glasshouse.**

1238

1239 **S2 Data. Stem light reflectance data.**

1240

1241 **S3 Data.** Variant Call Format (VCF) file required for all genome-wide SNP diversity

1242 analyses.

1243

1244 **S4 Data.** Text file complementary to S3 Data file required for all genome-wide SNP diversity

1245 analyses.
